# Supplementary material for: Cytokine production by activated plasmacytoid dendritic cells and natural killer cells is suppressed by an IRAK4 inhibitor
Source: PubMed Central journal article supplement (PMC6235225; doi:10.1186/s13075-018-1702-0), 2018-10-24
Supplement: 13075_2018_1702_MOESM11_ESM.pdf [file 13075_2018_1702_MOESM11_ESM.pdf]

## Additional file 11. Enriched signal processing pathways

**Table S5.** Significantly enriched signal processing pathways\* based on differentially expressed genes (FDR<0.05) for RNAIC vs MOCK stimulated pDCs and for RNAIC HCQ vs RNAIC I92 (n=125) \* total number of entities/genes annotated within pathway. \*Pathway Studio  
\*\* One-sided Mann-Whitney U-test

| Signaling Target                  | Entities (n)* | Expanded entities (n) | Overlapping entities (n) | Overlap (%) | Name of overlapping entities | p-value** | Jaccard similarity |
|-----------------------------------|---------------|-----------------------|--------------------------|-------------|------------------------------|-----------|--------------------|
| PTPRJ -> CTNND Signaling          | 2             | 2                     | 1                        | 50          | CTNND1                       | 0.01      | 0.01               |
| KIT -> STAT Signaling             | 6             | 6                     | 1                        | 16          | KIT                          | 0.03      | 0.01               |
| CCL15 Expression Targets          | 7             | 7                     | 1                        | 14          | CCR1                         | 0.04      | 0.01               |
| IL4R -> STAT Signaling            | 7             | 7                     | 1                        | 14          | IL2RG                        | 0.04      | 0.01               |
| IL13R -> STAT6 Signaling          | 7             | 7                     | 1                        | 14          | IL2RG                        | 0.04      | 0.01               |
| VEGFR -> CTNND Signaling          | 7             | 7                     | 1                        | 14          | CTNND1                       | 0.04      | 0.01               |
| CCL7 Expression Targets           | 8             | 8                     | 1                        | 12          | CCR1                         | 0.04      | 0.01               |
| PTPRC -> STAT6 Expression Targets | 8             | 8                     | 1                        | 12          | LGALS1                       | 0.04      | 0.01               |
| IL21R -> STAT Signaling           | 8             | 8                     | 1                        | 12          | IL2RG                        | 0.04      | 0.01               |
| IL9R -> STAT Signaling            | 8             | 8                     | 1                        | 12          | IL2RG                        | 0.04      | 0.01               |
| NF-kB Canonical Signaling         | 62            | 151                   | 3                        | 1           | LTB;PSMB8;PSMB9              | 0.04      | 0.01               |
| CCL8 Expression Targets           | 9             | 9                     | 1                        | 11          | CCR1                         | 0.046     | 0.01               |
| IL3R -> STAT Signaling            | 9             | 9                     | 1                        | 11          | IL3RA                        | 0.046     | 0.01               |
| IL7R -> STAT Signaling            | 9             | 9                     | 1                        | 11          | IL2RG                        | 0.046     | 0.01               |
