# Supplementary material for: Cytokine production by activated plasmacytoid dendritic cells and natural killer cells is suppressed by an IRAK4 inhibitor
Source: Springer Nature journal article supplement (doi:10.1186/s13075-018-1702-0), 2018-10-24
Supplement: MOESM1 [file 16222790]

## Additional file 1. Patient clinical characteristics

**Table S1** Clinical characteristics of SLE patients and their treatment at the time of blood sampling.

| <b>Patient characteristics</b>         |            |
|----------------------------------------|------------|
| Female n (%)                           | 13 (86)    |
| Male n (%)                             | 2 (14)     |
| Age years, median (range)              | 53 (32-81) |
| Disease duration years, median (range) | 15 (1-46)  |
| SLEDAI 2K* 0p                          | 9 (60)     |
| SLEDAI 2K 1-3p                         | 3 (20)     |
| SLEDAI 2K >4p                          | 3 (20)     |
| Anti-malarials n (%)                   | 8 (53)     |
| Mycophenolate mophetil n (%)           | 4 (27)     |
| Azathioprine n (%)                     | 3 (20)     |
| Prednisone n (%)                       | 9 (60)     |
| Methotrexate n (%)                     | 2 (14)     |
| No immunosuppression n (%)             | 2 (14)     |

\*SLEDAI 2K SLE Disease Activity Index 2000 <sup>1</sup>

1. Gladman DD, Ibanez D, Urowitz MB. Systemic lupus erythematosus disease activity index 2000. *J Rheumatol* 2002;**29**:288-91.
