# Supplementary material for: Cytokine production by activated plasmacytoid dendritic cells and natural killer cells is suppressed by an IRAK4 inhibitor
Source: Springer Nature journal article supplement (doi:10.1186/s13075-018-1702-0), 2018-10-24
Supplement: MOESM7 [file 16222790]

## Additional file 7 Gene list 975 differentially expressed genes

**Table S2.** Gene list 975 differentially expressed genes (DEGs) in pDCs stimulated by RNA-IC vs mock stimulated pDCs (FDR<0.05). Effects of I92 and HCQ on gene expression in RNA-IC stimulated pDCs. Chr; chromosome, FC; Fold Change (of gene expression between compared conditions), padj; adjusted p-value, FDR. \*FDR; False Discovery Rate, Benjamini Hochberg. List sorted in declining order according to log2FC of gene expression in RNA-IC compared to mock treated pDCs.

| EnsemblGeneID   | Gene, name   | Chr | log2FC<br>RNAIC vs<br>MOCK | padj<br>RNAIC vs<br>MOCK | log2FC<br>RNAIC_I92 vs<br>RNAIC | padj<br>RNAIC_I92<br>vs RNAIC | log2FC<br>RNAIC_HCQ<br>vs RNAIC | padj<br>RNAIC_HCQ<br>vs RNAIC | Gene, description                                           | Gene, type      |
|-----------------|--------------|-----|----------------------------|--------------------------|---------------------------------|-------------------------------|---------------------------------|-------------------------------|-------------------------------------------------------------|-----------------|
| ENSG00000120217 | CD274        | 9   | 3.32                       | 1.46E-05                 | -3.29                           | 1.11E-06                      | -2.75                           | 3.02E-03                      | CD274 molecule                                              | protein coding  |
| ENSG00000123685 | BATF3        | 1   | 3.23                       | 1.71E-06                 | -3.16                           | 7.64E-08                      | -1.89                           | NA                            | basic leucine zipper ATF-like transcription factor 3        | protein coding  |
| ENSG00000110848 | CD69         | 12  | 3.08                       | 8.85E-05                 | -3.33                           | 1.05E-06                      | -2.91                           | 1.15E-03                      | CD69 molecule                                               | protein coding  |
| ENSG00000275302 | CCL4         | 17  | 3.06                       | 1.11E-04                 | -2.91                           | 2.76E-05                      | -1.89                           | 0.06                          | C-C motif chemokine ligand 4                                | protein coding  |
| ENSG00000175183 | CSRP2        | 12  | 3.05                       | 2.09E-05                 | -2.65                           | 2.85E-05                      | -2.03                           | NA                            | cysteine and glycine rich protein 2                         | protein coding  |
| ENSG00000119922 | IFIT2        | 10  | 3.03                       | 1.37E-06                 | -2.08                           | 3.31E-04                      | -2.40                           | 1.15E-03                      | interferon induced protein with tetratricopeptide repeats 2 | protein coding  |
| ENSG00000101017 | CD40         | 20  | 2.87                       | 1.46E-05                 | -2.16                           | 3.34E-04                      | -1.86                           | 0.03                          | CD40 molecule                                               | protein coding  |
| ENSG00000188379 | IFNA2        | 9   | 2.79                       | 7.37E-04                 | -2.80                           | 1.02E-04                      | -2.79                           | 4.02E-03                      | interferon alpha 2                                          | protein coding  |
| ENSG00000169245 | CXCL10       | 4   | 2.73                       | 1.12E-03                 | -2.79                           | 1.15E-04                      | -2.68                           | 0.01                          | C-X-C motif chemokine ligand 10                             | protein coding  |
| ENSG00000129514 | FOXA1        | 14  | 2.72                       | 1.04E-03                 | -2.29                           | 1.73E-03                      | -2.31                           | NA                            | forkhead box A1                                             | protein coding  |
| ENSG00000185338 | SOCS1        | 16  | 2.65                       | 1.04E-04                 | -2.61                           | 1.33E-05                      | -2.14                           | 0.01                          | suppressor of cytokine signaling 1                          | protein coding  |
| ENSG00000112149 | CD83         | 6   | 2.64                       | 6.33E-04                 | -2.45                           | 3.03E-04                      | -1.95                           | 0.05                          | CD83 molecule                                               | protein coding  |
| ENSG00000081041 | CXCL2        | 4   | 2.61                       | 1.45E-03                 | -1.23                           | 0.12                          | -1.56                           | NA                            | C-X-C motif chemokine ligand 2                              | protein coding  |
| ENSG00000101670 | LIPG         | 18  | 2.61                       | 1.27E-03                 | -2.74                           | 7.99E-05                      | -2.30                           | NA                            | lipase G, endothelial type                                  | protein coding  |
| ENSG00000135114 | OASL         | 12  | 2.60                       | 9.55E-04                 | -2.86                           | 2.10E-05                      | -2.28                           | 0.02                          | 2'-5'-oligoadenylate synthetase like                        | protein coding  |
| ENSG00000221963 | APOL6        | 22  | 2.55                       | 1.32E-03                 | -3.49                           | 1.33E-07                      | -2.15                           | 0.03                          | apolipoprotein L6                                           | protein coding  |
| ENSG00000162772 | ATF3         | 1   | 2.54                       | 1.12E-03                 | -2.68                           | 6.75E-05                      | -2.21                           | 0.02                          | activating transcription factor 3                           | protein coding  |
| ENSG00000162654 | GBP4         | 1   | 2.51                       | 8.25E-04                 | -3.38                           | 7.43E-08                      | -2.16                           | 0.02                          | guanylate binding protein 4                                 | protein coding  |
| ENSG00000168811 | IL12A        | 3   | 2.47                       | 3.66E-03                 | -2.56                           | 4.68E-04                      | -2.55                           | NA                            | interleukin 12A                                             | protein coding  |
| ENSG00000231105 | RP5-1071N3,1 | 1   | 2.47                       | 1.28E-03                 | -2.64                           | 5.81E-05                      | -2.07                           | NA                            |                                                             | antisense       |
| ENSG00000104951 | IL4I1        | 19  | 2.44                       | 1.55E-03                 | -3.30                           | 3.54E-07                      | -1.81                           | 0.06                          | interleukin 4 induced 1                                     | protein coding  |
| ENSG00000140379 | BCL2A1       | 15  | 2.44                       | 3.16E-03                 | -2.48                           | 4.97E-04                      | -1.88                           | 0.07                          | BCL2 related protein A1                                     | protein coding  |
| ENSG00000121858 | TNFSF10      | 3   | 2.40                       | 1.98E-03                 | -2.30                           | 6.41E-04                      | -2.03                           | 0.03                          | tumor necrosis factor superfamily member 10                 | protein coding  |
| ENSG00000119917 | IFIT3        | 10  | 2.38                       | 1.92E-03                 | -2.70                           | 3.56E-05                      | -2.17                           | 0.02                          | interferon induced protein with tetratricopeptide repeats 3 | protein coding  |
| ENSG00000140511 | HAPLN3       | 15  | 2.36                       | 2.23E-03                 | -2.69                           | 4.34E-05                      | -1.56                           | 0.10                          | hyaluronan and proteoglycan link protein 3                  | protein coding  |
| ENSG00000141753 | IGFBP4       | 17  | 2.32                       | 4.12E-03                 | -3.35                           | 5.19E-07                      | -2.41                           | 0.01                          | insulin like growth factor binding protein 4                | protein coding  |
| ENSG00000254030 | IGLC5        | 22  | 2.26                       | 2.36E-03                 | -3.15                           | 5.19E-07                      | -1.95                           | NA                            | immunoglobulin lambda constant 5 (pseudogene)               | IG C pseudogene |
| ENSG00000090339 | ICAM1        | 19  | 2.19                       | 1.46E-05                 | -1.88                           | 3.31E-05                      | -1.53                           | 0.02                          | intercellular adhesion molecule 1                           | protein coding  |
| ENSG00000075618 | FSCN1        | 7   | 2.19                       | 1.28E-03                 | -2.35                           | 5.61E-05                      | -1.15                           | 0.15                          | fascin actin-bundling protein 1                             | protein coding  |
| ENSG00000162783 | IER5         | 1   | 2.15                       | 2.65E-04                 | -1.60                           | 2.51E-03                      | -1.58                           | 0.03                          | immediate early response 5                                  | protein coding  |
| ENSG00000188820 | FAM26F       | 6   | 2.14                       | 1.02E-04                 | -2.30                           | 1.40E-06                      | -1.38                           | NA                            | family with sequence similarity 26 member F                 | protein coding  |
| ENSG00000101438 | SLC32A1      | 20  | 2.14                       | 9.34E-07                 | -1.71                           | 1.28E-05                      | -1.05                           | 0.07                          | solute carrier family 32 member 1                           | protein coding  |
| ENSG00000184557 | SOCS3        | 17  | 2.12                       | 3.11E-03                 | -2.37                           | 1.03E-04                      | -1.83                           | 0.04                          | suppressor of cytokine signaling 3                          | protein coding  |
| ENSG00000143333 | RGS16        | 1   | 2.12                       | 0.01                     | -2.79                           | 4.20E-05                      | -2.51                           | NA                            | regulator of G-protein signaling 16                         | protein coding  |
| ENSG00000136514 | RTP4         | 3   | 2.12                       | 2.52E-03                 | -1.98                           | 9.40E-04                      | -2.11                           | NA                            | receptor transporter protein 4                              | protein coding  |
| ENSG00000277632 | CCL3         | 17  | 2.11                       | 0.02                     | -2.00                           | 0.01                          | -1.45                           | NA                            | C-C motif chemokine ligand 3                                | protein coding  |
| ENSG00000276085 | CCL3L3       | 17  | 2.10                       | 0.01                     | -2.11                           | 3.18E-03                      | -1.73                           | NA                            | C-C motif chemokine ligand 3 like 3                         | protein coding  |
| ENSG00000168334 | XIRP1        | 3   | 2.10                       | 0.01                     | -2.63                           | 7.43E-05                      | -1.81                           | NA                            | xin actin binding repeat containing 1                       | protein coding  |

|                 |                |    |      |          |       |          |       |      |                                                                           |                      |
|-----------------|----------------|----|------|----------|-------|----------|-------|------|---------------------------------------------------------------------------|----------------------|
| ENSG00000118946 | PCDH17         | 13 | 2.10 | 0.01     | -3.10 | 6.77E-06 | -2.72 | NA   | protocadherin 17                                                          | protein coding       |
| ENSG00000272463 | RP11-532F6,3   | 6  | 2.05 | 0.01     | -2.58 | 1.06E-04 | -1.41 | NA   |                                                                           | lincRNA              |
| ENSG00000124762 | CDKN1A         | 6  | 2.04 | 1.58E-03 | -1.62 | 4.90E-03 | -1.39 | 0.08 | cyclin dependent kinase inhibitor 1A                                      | protein coding       |
| ENSG00000204389 | HSPA1A         | 6  | 2.03 | 0.02     | -2.07 | 4.60E-03 | -1.92 | NA   | heat shock protein family A (Hsp70) member 1A                             | protein coding       |
| ENSG00000117228 | GBP1           | 1  | 2.01 | 0.02     | -2.25 | 2.37E-03 | -1.91 | NA   | guanylate binding protein 1                                               | protein coding       |
| ENSG00000278195 | SSTR3          | 22 | 2.01 | 0.02     | -2.40 | 4.95E-04 | -2.12 | NA   | somatostatin receptor 3                                                   | protein coding       |
| ENSG00000138755 | CXCL9          | 4  | 2.01 | 0.02     | -2.01 | 0.01     | -1.79 | 0.08 | C-X-C motif chemokine ligand 9                                            | protein coding       |
| ENSG00000119508 | NR4A3          | 9  | 2.01 | 0.02     | -2.83 | 3.68E-05 | -1.94 | 0.06 | nuclear receptor subfamily 4 group A member 3                             | protein coding       |
| ENSG00000254704 | RP11-1036E20,7 | 11 | 2.01 | 1.45E-03 | -3.75 | 1.89E-12 | -2.26 | NA   |                                                                           | processed pseudogene |
| ENSG00000159166 | LAD1           | 1  | 2.00 | 9.80E-04 | -3.14 | 1.56E-09 | -0.99 | NA   | ladinin 1                                                                 | protein coding       |
| ENSG00000185215 | TNFAIP2        | 14 | 2.00 | 0.01     | -2.35 | 5.39E-04 | -1.84 | 0.06 | TNF alpha induced protein 2                                               | protein coding       |
| ENSG00000185745 | IFIT1          | 10 | 1.99 | 0.02     | -2.63 | 1.70E-04 | -2.33 | 0.02 | interferon induced protein with tetratricopeptide repeats 1               | protein coding       |
| ENSG00000163273 | NPPC           | 2  | 1.99 | 0.02     | -1.35 | 0.09     | -1.94 | NA   | natriuretic peptide C                                                     | protein coding       |
| ENSG00000104368 | PLAT           | 8  | 1.98 | 0.02     | -3.04 | 1.46E-05 | -1.69 | NA   | plasminogen activator, tissue type                                        | protein coding       |
| ENSG00000158050 | DUSP2          | 2  | 1.97 | 0.01     | -1.87 | 4.96E-03 | -1.28 | NA   | dual specificity phosphatase 2                                            | protein coding       |
| ENSG00000107201 | DDX58          | 9  | 1.96 | 0.01     | -2.49 | 1.09E-04 | -1.83 | 0.05 | DExD/H-box helicase 58                                                    | protein coding       |
| ENSG00000118976 | OTUD4P1        | 12 | 1.96 | 0.01     | -2.63 | 2.55E-05 | -1.60 | NA   | OTUD4 pseudogene 1                                                        | processed pseudogene |
| ENSG00000126353 | CCR7           | 17 | 1.95 | 2.13E-03 | -2.59 | 1.01E-06 | -1.51 | 0.06 | C-C motif chemokine receptor 7                                            | protein coding       |
| ENSG00000073756 | PTGS2          | 1  | 1.93 | 0.02     | -2.10 | 2.20E-03 | -2.04 | NA   | prostaglandin-endoperoxide synthase 2                                     | protein coding       |
| ENSG00000079215 | SLC1A3         | 5  | 1.92 | 0.01     | -2.23 | 4.37E-04 | -1.17 | NA   | solute carrier family 1 member 3                                          | protein coding       |
| ENSG00000226979 | LTA            | 6  | 1.92 | 0.02     | -2.25 | 6.22E-04 | -1.82 | NA   | lymphotoxin alpha                                                         | protein coding       |
| ENSG00000169136 | ATF5           | 19 | 1.91 | 3.77E-03 | -2.63 | 1.52E-06 | -1.47 | 0.07 | activating transcription factor 5                                         | protein coding       |
| ENSG00000125347 | IRF1           | 5  | 1.90 | 2.27E-06 | -1.42 | 1.31E-04 | -1.38 | 0.01 | interferon regulatory factor 1                                            | protein coding       |
| ENSG00000056558 | TRAF1          | 9  | 1.90 | 0.01     | -2.62 | 1.42E-05 | -1.55 | 0.08 | TNF receptor associated factor 1                                          | protein coding       |
| ENSG00000143344 | RGL1           | 1  | 1.89 | 1.58E-03 | -2.58 | 2.56E-07 | -1.50 | 0.04 | ral guanine nucleotide dissociation stimulator like 1                     | protein coding       |
| ENSG00000102096 | PIM2           | X  | 1.87 | 6.51E-05 | -0.67 | 0.16     | -1.17 | 0.06 | Pim-2 proto-oncogene, serine/threonine kinase                             | protein coding       |
| ENSG00000109320 | NFKB1          | 4  | 1.85 | 2.48E-04 | -1.62 | 2.78E-04 | -1.42 | 0.02 | nuclear factor kappa B subunit 1                                          | protein coding       |
| ENSG00000104312 | RIPK2          | 8  | 1.84 | 1.94E-04 | -1.40 | 1.65E-03 | -1.37 | 0.03 | receptor interacting serine/threonine kinase 2                            | protein coding       |
| ENSG00000115267 | IFIH1          | 2  | 1.84 | 0.01     | -1.63 | 0.01     | -1.46 | 0.07 | interferon induced with helicase C domain 1                               | protein coding       |
| ENSG00000260314 | MRC1           | 10 | 1.83 | 0.03     | -1.47 | 0.05     | -1.39 | NA   | mannose receptor C-type 1                                                 | protein coding       |
| ENSG00000118971 | CCND2          | 12 | 1.83 | 0.01     | -1.59 | 0.01     | -1.85 | 0.03 | cyclin D2                                                                 | protein coding       |
| ENSG00000100906 | NFKBIA         | 14 | 1.81 | 1.46E-05 | -0.99 | 0.01     | -1.21 | 0.02 | NFKB inhibitor alpha                                                      | protein coding       |
| ENSG00000111846 | GCNT2          | 6  | 1.80 | 0.01     | -1.71 | 3.38E-03 | -1.51 | NA   | glucosaminyl (N-acetyl) transferase 2, I-branching enzyme (I blood group) | protein coding       |
| ENSG00000171855 | IFNB1          | 9  | 1.80 | 0.04     | -1.80 | 0.01     | -1.79 | 0.07 | interferon beta 1                                                         | protein coding       |
| ENSG00000170340 | B3GNT2         | 2  | 1.79 | 1.46E-05 | -1.29 | 7.00E-04 | -1.29 | 0.02 | UDP-GlcNAc:betaGal beta-1,3-N-acetylglucosaminyltransferase 2             | protein coding       |
| ENSG00000120280 | CXorf21        | X  | 1.78 | 8.85E-05 | -2.31 | 1.83E-09 | -1.45 | 0.01 | chromosome X open reading frame 21                                        | protein coding       |
| ENSG00000087085 | ACHE           | 7  | 1.77 | 0.01     | -1.80 | 9.67E-04 | -0.99 | NA   | acetylcholinesterase (Cartwright blood group)                             | protein coding       |
| ENSG00000152778 | IFIT5          | 10 | 1.75 | 7.63E-04 | -1.32 | 4.83E-03 | -1.39 | 0.03 | interferon induced protein with tetratricopeptide repeats 5               | protein coding       |
| ENSG00000232810 | TNF            | 6  | 1.75 | 0.02     | -1.70 | 0.01     | -2.01 | 0.02 | tumor necrosis factor                                                     | protein coding       |
| ENSG00000131669 | NINJ1          | 9  | 1.74 | 3.98E-03 | -1.22 | 0.03     | -1.31 | 0.08 | ninjurin 1                                                                | protein coding       |

|                 |            |    |      |          |       |          |       |      |                                                        |                |
|-----------------|------------|----|------|----------|-------|----------|-------|------|--------------------------------------------------------|----------------|
| ENSG00000137193 | PIM1       | 6  | 1.74 | 1.01E-03 | -1.28 | 0.01     | -1.00 | 0.12 | Pim-1 proto-oncogene, serine/threonine kinase          | protein coding |
| ENSG00000171223 | JUNB       | 19 | 1.73 | 4.50E-03 | -1.75 | 7.95E-04 | -1.53 | 0.04 | JunB proto-oncogene, AP-1 transcription factor subunit | protein coding |
| ENSG00000184060 | ADAP2      | 17 | 1.72 | 0.03     | -1.62 | 0.01     | -2.05 | NA   | ArfGAP with dual PH domains 2                          | protein coding |
| ENSG00000164181 | ELOVL7     | 5  | 1.70 | 0.01     | -1.33 | 0.02     | -0.91 | NA   | ELOVL fatty acid elongase 7                            | protein coding |
| ENSG00000141682 | PMAIP1     | 18 | 1.68 | 4.81E-04 | -1.25 | 3.72E-03 | -1.38 | 0.02 | phorbol-12-myristate-13-acetate-induced protein 1      | protein coding |
| ENSG00000026103 | FAS        | 10 | 1.67 | 0.01     | -2.20 | 6.02E-05 | -1.53 | 0.06 | Fas cell surface death receptor                        | protein coding |
| ENSG00000146232 | NFKBIE     | 6  | 1.65 | 2.75E-05 | -1.23 | 6.06E-04 | -1.05 | 0.04 | NFKB inhibitor epsilon                                 | protein coding |
| ENSG00000237181 | AC147651,4 | 7  | 1.65 | 0.04     | -2.06 | 1.94E-03 | -1.15 | NA   |                                                        | antisense      |
| ENSG00000272941 | RP11-      | 7  | 1.64 | 0.03     | -1.64 | 0.01     | -1.40 | NA   |                                                        | antisense      |
| ENSG00000110047 | EHD1       | 11 | 1.63 | 6.74E-04 | -1.03 | 0.02     | -0.98 | 0.10 | EH domain containing 1                                 | protein coding |
| ENSG00000162623 | TYW3       | 1  | 1.62 | 2.15E-03 | -1.20 | 0.01     | -1.12 | 0.08 | tRNA-yW synthesizing protein 3 homolog                 | protein coding |
| ENSG00000073282 | TP63       | 3  | 1.62 | 0.03     | -2.65 | 7.04E-06 | -1.62 | NA   | tumor protein p63                                      | protein coding |
| ENSG00000107796 | ACTA2      | 10 | 1.61 | 0.02     | -1.04 | 0.09     | -1.29 | NA   | actin, alpha 2, smooth muscle, aorta                   | protein coding |
| ENSG00000185947 | ZNF267     | 16 | 1.60 | 2.33E-04 | -1.21 | 1.99E-03 | -1.31 | 0.02 | zinc finger protein 267                                | protein coding |
| ENSG00000174004 | NRROS      | 3  | 1.60 | 4.09E-05 | -1.50 | 1.17E-05 | -0.92 | 0.07 | negative regulator of reactive oxygen species          | protein coding |
| ENSG00000104371 | DKK4       | 8  | 1.59 | 0.03     | -3.95 | 1.62E-11 | -1.25 | NA   | dickkopf WNT signaling pathway inhibitor 4             | protein coding |
| ENSG00000165997 | ARL5B      | 10 | 1.59 | 0.02     | -1.11 | 0.07     | -1.40 | 0.08 | ADP ribosylation factor like GTPase 5B                 | protein coding |
| ENSG00000124145 | SDC4       | 20 | 1.59 | 3.35E-03 | -1.46 | 1.69E-03 | -0.81 | NA   | syndecan 4                                             | protein coding |
| ENSG00000125657 | TNFSF9     | 19 | 1.59 | 0.02     | -2.17 | 7.27E-05 | -1.40 | NA   | tumor necrosis factor superfamily member 9             | protein coding |
| ENSG00000090104 | RGS1       | 1  | 1.59 | 0.03     | -2.37 | 8.30E-05 | -1.47 | 0.09 | regulator of G-protein signaling 1                     | protein coding |
| ENSG00000136048 | DRAM1      | 12 | 1.59 | 0.01     | -2.12 | 6.70E-05 | -1.44 | NA   | DNA damage regulated autophagy modulator 1             | protein coding |
| ENSG00000105559 | PLEKHA4    | 19 | 1.58 | 0.03     | -1.04 | 0.10     | -1.28 | NA   | pleckstrin homology domain containing A4               | protein coding |
| ENSG00000141837 | CACNA1A    | 19 | 1.57 | 0.04     | -3.34 | 6.21E-08 | -1.97 | NA   | calcium voltage-gated channel subunit alpha1 A         | protein coding |
| ENSG00000117280 | RAB29      | 1  | 1.57 | 1.05E-03 | -1.87 | 4.03E-06 | -1.23 | 0.04 | RAB29, member RAS oncogene family                      | protein coding |
| ENSG00000135925 | WNT10A     | 2  | 1.57 | 5.59E-05 | -1.29 | 2.23E-04 | -0.71 | 0.14 | Wnt family member 10A                                  | protein coding |
| ENSG00000163947 | ARHGEF3    | 3  | 1.56 | 0.02     | -1.41 | 0.01     | -1.26 | 0.10 | Rho guanine nucleotide exchange factor 3               | protein coding |
| ENSG00000171522 | PTGER4     | 5  | 1.56 | 3.90E-04 | -0.89 | 0.03     | -1.13 | 0.04 | prostaglandin E receptor 4                             | protein coding |
| ENSG00000272269 | RP11-      | 6  | 1.55 | 1.58E-03 | -1.39 | 1.09E-03 | -1.26 | NA   |                                                        | antisense      |
| ENSG00000106537 | TSPAN13    | 7  | 1.53 | 4.25E-04 | -1.30 | 6.96E-04 | -0.94 | 0.08 | tetraspanin 13                                         | protein coding |
| ENSG00000198053 | SIRPA      | 20 | 1.53 | 0.01     | -2.13 | 3.84E-06 | -1.32 | 0.05 | signal regulatory protein alpha                        | protein coding |
| ENSG00000132109 | TRIM21     | 11 | 1.53 | 4.81E-04 | -1.10 | 0.01     | -0.93 | 0.09 | tripartite motif containing 21                         | protein coding |
| ENSG00000104856 | RELB       | 19 | 1.53 | 2.27E-06 | -1.27 | 1.49E-05 | -0.91 | 0.03 | RELB proto-oncogene, NF-kB subunit                     | protein coding |
| ENSG00000023445 | BIRC3      | 11 | 1.51 | 0.03     | -2.27 | 2.76E-05 | -1.47 | 0.07 | baculoviral IAP repeat containing 3                    | protein coding |
| ENSG00000169429 | CXCL8      | 4  | 1.50 | 0.03     | -1.41 | 0.02     | -1.23 | 0.12 | C-X-C motif chemokine ligand 8                         | protein coding |
| ENSG00000035720 | STAP1      | 4  | 1.49 | 0.01     | -2.61 | 2.09E-08 | -1.40 | 0.05 | signal transducing adaptor family member 1             | protein coding |
| ENSG00000136867 | SLC31A2    | 9  | 1.49 | 1.03E-03 | -1.07 | 0.01     | -1.18 | NA   | solute carrier family 31 member 2                      | protein coding |
| ENSG00000099968 | BCL2L13    | 22 | 1.48 | 2.09E-03 | -0.98 | 0.02     | -1.08 | 0.07 | BCL2 like 13                                           | protein coding |
| ENSG00000135604 | STX11      | 6  | 1.47 | 2.27E-03 | -1.71 | 2.91E-05 | -0.98 | NA   | syntaxin 11                                            | protein coding |
| ENSG00000077150 | NFKB2      | 10 | 1.47 | 2.70E-04 | -1.35 | 1.58E-04 | -1.12 | 0.03 | nuclear factor kappa B subunit 2                       | protein coding |
| ENSG00000137393 | RNF144B    | 6  | 1.47 | 1.28E-03 | -1.38 | 5.07E-04 | -1.31 | 0.02 | ring finger protein 144B                               | protein coding |
| ENSG00000146425 | DYNLT1     | 6  | 1.46 | 0.01     | -1.49 | 1.27E-03 | -1.19 | 0.07 | dynein light chain Tctex-type 1                        | protein coding |
| ENSG00000149289 | ZC3H12C    | 11 | 1.46 | 0.02     | -1.92 | 2.40E-04 | -0.98 | NA   | zinc finger CCCH-type containing 12C                   | protein coding |
| ENSG00000184378 | ACTRT3     | 3  | 1.46 | 0.02     | -1.55 | 2.38E-03 | -1.23 | NA   | actin related protein T3                               | protein coding |

|                 |           |    |      |          |       |          |       |      |                                                                 |                                  |
|-----------------|-----------|----|------|----------|-------|----------|-------|------|-----------------------------------------------------------------|----------------------------------|
| ENSG0000003402  | CFLAR     | 2  | 1.46 | 0.02     | -1.39 | 0.01     | -1.42 | 0.05 | CASP8 and FADD like apoptosis regulator                         | protein coding                   |
| ENSG00000050344 | NFE2L3    | 7  | 1.45 | 4.81E-04 | -2.14 | 7.13E-10 | -0.85 | 0.10 | nuclear factor, erythroid 2 like 3                              | protein coding                   |
| ENSG00000095794 | CREM      | 10 | 1.44 | 0.02     | -1.63 | 2.23E-03 | -1.23 | 0.10 | cAMP responsive element modulator                               | protein coding                   |
| ENSG00000160013 | PTGIR     | 19 | 1.44 | 4.81E-04 | -2.01 | 6.38E-09 | -1.24 | NA   | prostaglandin I2 (prostacyclin) receptor (IP)                   | protein coding                   |
| ENSG00000135148 | TRAFD1    | 12 | 1.44 | 4.81E-04 | -1.17 | 1.51E-03 | -0.93 | 0.08 | TRAF-type zinc finger domain containing 1                       | protein coding                   |
| ENSG00000166192 | SENP8     | 15 | 1.43 | 0.04     | -0.65 | 0.30     | -0.42 | NA   | SUMO/sentrin peptidase family member, NEDD8 specific            | protein coding                   |
| ENSG00000183386 | FHL3      | 1  | 1.43 | 3.41E-03 | -1.82 | 8.47E-06 | -1.32 | NA   | four and a half LIM domains 3                                   | protein coding                   |
| ENSG00000114737 | CISH      | 3  | 1.42 | 1.44E-03 | -1.65 | 1.30E-05 | -1.26 | NA   | cytokine inducible SH2 containing protein                       | protein coding                   |
| ENSG00000130202 | NECTIN2   | 19 | 1.41 | 0.01     | -1.85 | 1.35E-05 | -1.29 | NA   | nectin cell adhesion molecule 2                                 | protein coding                   |
| ENSG00000103966 | EHD4      | 15 | 1.41 | 0.03     | -1.08 | 0.05     | -1.03 | 0.15 | EH domain containing 4                                          | protein coding                   |
| ENSG00000272016 | NA        | NA | 1.41 | 0.01     | -1.38 | 2.89E-03 | -1.02 | 0.11 | NA                                                              | NA                               |
| ENSG00000123737 | EXOSC9    | 4  | 1.41 | 3.28E-03 | -1.51 | 2.27E-04 | -1.34 | 0.02 | exosome component 9                                             | protein coding                   |
| ENSG00000116663 | FBXO6     | 1  | 1.40 | 2.99E-03 | -1.10 | 0.01     | -0.73 | 0.19 | F-box protein 6                                                 | protein coding                   |
| ENSG00000164611 | PTTG1     | 5  | 1.39 | 1.38E-04 | -1.64 | 1.57E-07 | -0.77 | NA   | pituitary tumor-transforming 1                                  | protein coding                   |
| ENSG00000116791 | CRYZ      | 1  | 1.39 | 6.15E-04 | -2.52 | 3.36E-14 | -0.98 | 0.06 | crystallin zeta                                                 | protein coding                   |
| ENSG00000160050 | CCDC28B   | 1  | 1.39 | 4.81E-04 | -1.03 | 4.00E-03 | -0.55 | 0.25 | coiled-coil domain containing 28B                               | protein coding                   |
| ENSG00000168394 | TAP1      | 6  | 1.38 | 9.55E-04 | -1.06 | 4.84E-03 | -0.62 | 0.21 | transporter 1, ATP binding cassette subfamily B member          | protein coding                   |
| ENSG00000104267 | CA2       | 8  | 1.37 | 0.02     | -2.07 | 8.00E-06 | -1.13 | NA   | carbonic anhydrase 2                                            | protein coding                   |
| ENSG00000103642 | LACTB     | 15 | 1.36 | 4.81E-04 | -1.29 | 1.52E-04 | -1.07 | NA   | lactamase beta                                                  | protein coding                   |
| ENSG00000140464 | PML       | 15 | 1.36 | 2.36E-03 | -1.28 | 1.04E-03 | -1.08 | 0.05 | promyelocytic leukemia                                          | protein coding                   |
| ENSG00000117298 | ECE1      | 1  | 1.36 | 0.01     | -1.36 | 1.72E-03 | -1.15 | 0.06 | endothelin converting enzyme 1                                  | protein coding                   |
| ENSG00000277443 | MARCKS    | 6  | 1.35 | 0.03     | -1.34 | 0.01     | -0.85 | NA   | myristoylated alanine rich protein kinase C substrate           | protein coding                   |
| ENSG00000181359 | HSP90AA6P | 4  | 1.34 | 0.01     | -0.81 | 0.08     | -1.23 | NA   | heat shock protein 90 alpha family class A member 6, pseudogene | transcribed processed pseudogene |
| ENSG00000124201 | ZNFX1     | 20 | 1.34 | 4.68E-03 | -1.31 | 1.41E-03 | -1.15 | 0.05 | zinc finger NFX1-type containing 1                              | protein coding                   |
| ENSG00000112096 | SOD2      | 6  | 1.34 | 0.01     | -1.16 | 0.01     | -0.93 | 0.11 | superoxide dismutase 2                                          | protein coding                   |
| ENSG00000168421 | RHOH      | 4  | 1.34 | 4.66E-05 | -0.94 | 1.68E-03 | -0.82 | 0.06 | ras homolog family member H                                     | protein coding                   |
| ENSG00000123975 | CKS2      | 9  | 1.34 | 4.81E-04 | -0.68 | 0.06     | -0.75 | 0.11 | CDC28 protein kinase regulatory subunit 2                       | protein coding                   |
| ENSG00000064989 | CALCRL    | 2  | 1.34 | 0.04     | -1.55 | 3.27E-03 | -0.99 | 0.17 | calcitonin receptor like receptor                               | protein coding                   |
| ENSG00000087074 | PPP1R15A  | 19 | 1.33 | 0.04     | -1.40 | 0.01     | -1.37 | 0.07 | protein phosphatase 1 regulatory subunit 15A                    | protein coding                   |
| ENSG00000100644 | HIF1A     | 14 | 1.32 | 2.81E-03 | -1.05 | 0.01     | -1.04 | 0.06 | hypoxia inducible factor 1 alpha subunit                        | protein coding                   |
| ENSG00000136810 | TXN       | 9  | 1.32 | 2.36E-03 | -1.60 | 1.28E-05 | -0.81 | 0.12 | thioredoxin                                                     | protein coding                   |
| ENSG00000166128 | RAB8B     | 15 | 1.32 | 1.69E-03 | -1.15 | 1.83E-03 | -0.80 | 0.12 | RAB8B, member RAS oncogene family                               | protein coding                   |
| ENSG00000229644 | NAMPTP1   | 10 | 1.31 | 0.03     | -1.11 | 0.03     | -0.85 | NA   | nicotinamide phosphoribosyltransferase pseudogene 1             | processed pseudogene             |
| ENSG00000186827 | TNFRSF4   | 1  | 1.31 | 3.25E-04 | -1.78 | 5.35E-09 | -0.97 | 0.03 | TNF receptor superfamily member 4                               | protein coding                   |
| ENSG00000128203 | ASPHD2    | 22 | 1.30 | 8.04E-05 | -1.13 | 1.08E-04 | -1.08 | 0.01 | aspartate beta-hydroxylase domain containing 2                  | protein coding                   |
| ENSG00000204482 | LST1      | 6  | 1.29 | 0.01     | -0.63 | 0.16     | -0.68 | NA   | leukocyte specific transcript 1                                 | protein coding                   |
| ENSG00000008516 | MMP25     | 16 | 1.29 | 1.03E-03 | -1.94 | 2.82E-09 | -0.65 | NA   | matrix metalloproteinase 25                                     | protein coding                   |
| ENSG00000105835 | NAMPT     | 7  | 1.27 | 0.02     | -1.25 | 0.01     | -1.08 | 0.09 | nicotinamide phosphoribosyltransferase                          | protein coding                   |
| ENSG00000156675 | RAB11FIP1 | 8  | 1.27 | 4.51E-03 | -0.93 | 0.02     | -0.88 | 0.10 | RAB11 family interacting protein 1                              | protein coding                   |
| ENSG00000162645 | GBP2      | 1  | 1.27 | 0.04     | -3.13 | 1.69E-11 | -1.22 | NA   | guanylate binding protein 2                                     | protein coding                   |

|                 |              |    |      |          |       |          |       |      |                                                                                       |                |
|-----------------|--------------|----|------|----------|-------|----------|-------|------|---------------------------------------------------------------------------------------|----------------|
| ENSG00000103522 | IL21R        | 16 | 1.27 | 0.03     | -1.93 | 6.37E-05 | -1.01 | 0.14 | interleukin 21 receptor                                                               | protein coding |
| ENSG00000123240 | OPTN         | 10 | 1.26 | 0.01     | -1.63 | 5.87E-05 | -1.11 | 0.06 | optineurin                                                                            | protein coding |
| ENSG00000197329 | PELI1        | 2  | 1.26 | 8.46E-04 | -1.03 | 2.19E-03 | -0.96 | NA   | pellino E3 ubiquitin protein ligase 1                                                 | protein coding |
| ENSG00000137747 | TMPRSS13     | 11 | 1.26 | 0.03     | -1.97 | 2.10E-05 | -1.30 | 0.06 | transmembrane protease, serine 13                                                     | protein coding |
| ENSG00000164236 | ANKRD33B     | 5  | 1.26 | 0.03     | -1.56 | 9.60E-04 | -0.76 | NA   | ankyrin repeat domain 33B                                                             | protein coding |
| ENSG00000135821 | GLUL         | 1  | 1.25 | 0.01     | -0.96 | 0.03     | -1.08 | 0.07 | glutamate-ammonia ligase                                                              | protein coding |
| ENSG00000116514 | RNF19B       | 1  | 1.25 | 1.73E-03 | -0.95 | 0.01     | -1.04 | 0.03 | ring finger protein 19B                                                               | protein coding |
| ENSG00000164430 | MB21D1       | 6  | 1.24 | 0.01     | -1.53 | 1.31E-04 | -1.37 | 0.02 | Mab-21 domain containing 1                                                            | protein coding |
| ENSG00000196843 | ARID5A       | 2  | 1.23 | 1.44E-03 | -1.08 | 1.56E-03 | -1.01 | 0.03 | AT-rich interaction domain 5A                                                         | protein coding |
| ENSG00000137947 | GTF2B        | 1  | 1.23 | 1.48E-03 | -0.71 | 0.05     | -0.84 | 0.08 | general transcription factor IIB                                                      | protein coding |
| ENSG00000143384 | MCL1         | 1  | 1.23 | 8.79E-05 | -0.47 | 0.14     | -0.69 | 0.08 | BCL2 family apoptosis regulator                                                       | protein coding |
| ENSG00000262179 | RP1-302G2,5  | 6  | 1.22 | 0.01     | -1.17 | 3.21E-03 | -0.71 | NA   | Homo sapiens uncharacterized LOC101929726 (LOC101929726), transcript variant 2, mRNA, | protein coding |
| ENSG00000235750 | KIAA0040     | 1  | 1.22 | 1.54E-03 | -1.04 | 2.32E-03 | -1.01 | 0.03 | KIAA0040                                                                              | protein coding |
| ENSG00000162616 | DNAJB4       | 1  | 1.22 | 0.03     | -0.96 | 0.06     | -1.06 | 0.11 | DnaJ heat shock protein family (Hsp40) member B4                                      | protein coding |
| ENSG00000204642 | HLA-F        | 6  | 1.22 | 0.01     | -2.08 | 3.25E-09 | -0.77 | 0.14 | major histocompatibility complex, class I, F                                          | protein coding |
| ENSG00000174485 | DENND4A      | 15 | 1.21 | 0.02     | -1.66 | 8.03E-05 | -1.10 | 0.07 | DENN domain containing 4A                                                             | protein coding |
| ENSG00000135070 | ISCA1        | 9  | 1.21 | 4.74E-03 | -0.60 | 0.14     | -0.88 | 0.09 | iron-sulfur cluster assembly 1                                                        | protein coding |
| ENSG00000196735 | HLA-DQA1     | 6  | 1.21 | 0.01     | -1.92 | 1.20E-06 | -0.87 | 0.13 | major histocompatibility complex, class II, DQ alpha 1                                | protein coding |
| ENSG00000131979 | GCH1         | 14 | 1.20 | 0.04     | -1.80 | 1.09E-04 | -1.19 | 0.08 | GTP cyclohydrolase 1                                                                  | protein coding |
| ENSG00000160606 | TLCD1        | 17 | 1.20 | 0.02     | -1.07 | 0.02     | -0.85 | 0.15 | TLC domain containing 1                                                               | protein coding |
| ENSG00000172171 | TEFM         | 17 | 1.20 | 4.39E-03 | -0.52 | 0.19     | -0.65 | NA   | transcription elongation factor, mitochondrial                                        | protein coding |
| ENSG0000038210  | PI4K2B       | 4  | 1.20 | 0.04     | -0.81 | 0.12     | -0.79 | 0.22 | phosphatidylinositol 4-kinase type 2 beta                                             | protein coding |
| ENSG00000115604 | IL18R1       | 2  | 1.20 | 0.01     | -0.99 | 0.01     | -0.90 | 0.09 | interleukin 18 receptor 1                                                             | protein coding |
| ENSG00000166949 | SMAD3        | 15 | 1.20 | 1.18E-03 | -1.25 | 8.49E-05 | -1.00 | 0.03 | SMAD family member 3                                                                  | protein coding |
| ENSG00000182809 | CRIP2        | 14 | 1.20 | 0.01     | -1.46 | 2.97E-04 | -0.52 | NA   | cysteine rich protein 2                                                               | protein coding |
| ENSG00000149131 | SERPING1     | 11 | 1.20 | 3.31E-03 | -1.74 | 2.47E-07 | -0.78 | 0.12 | serpin family G member 1                                                              | protein coding |
| ENSG00000112759 | SLC29A1      | 6  | 1.20 | 5.46E-04 | -0.51 | 0.13     | -0.50 | 0.23 | solute carrier family 29 member 1 (Augustine blood group)                             | protein coding |
| ENSG00000258738 | RP11-73E17,2 | 14 | 1.19 | 1.41E-03 | -1.52 | 1.10E-06 | -0.82 | NA   |                                                                                       | antisense      |
| ENSG00000128641 | MYO1B        | 2  | 1.18 | 0.01     | -1.50 | 1.07E-04 | -0.90 | 0.10 | myosin IB                                                                             | protein coding |
| ENSG0000027075  | PRKCH        | 14 | 1.18 | 9.89E-04 | -1.31 | 1.90E-05 | -0.85 | 0.06 | protein kinase C eta                                                                  | protein coding |
| ENSG0000039068  | CDH1         | 16 | 1.17 | 2.13E-03 | -0.45 | 0.23     | -0.51 | 0.25 | cadherin 1                                                                            | protein coding |
| ENSG00000240065 | PSMB9        | 6  | 1.17 | 0.02     | -1.49 | 1.76E-04 | -0.56 | 0.29 | proteasome subunit beta 9                                                             | protein coding |
| ENSG00000196189 | SEMA4A       | 1  | 1.17 | 3.41E-03 | -1.68 | 3.77E-07 | -0.90 | 0.07 | semaphorin 4A                                                                         | protein coding |
| ENSG00000172785 | CBWD1        | 9  | 1.17 | 0.02     | -0.57 | 0.22     | -1.14 | NA   | COBW domain containing 1                                                              | protein coding |
| ENSG00000106803 | SEC61B       | 9  | 1.16 | 6.82E-04 | -0.52 | 0.12     | -0.47 | 0.25 | Sec61 translocon beta subunit                                                         | protein coding |
| ENSG00000213024 | NUP62        | 19 | 1.15 | 4.51E-03 | -0.97 | 0.01     | -0.86 | 0.08 | nucleoporin 62                                                                        | protein coding |
| ENSG0000057704  | TMCC3        | 12 | 1.14 | 0.03     | -1.63 | 9.99E-05 | -0.68 | 0.24 | transmembrane and coiled-coil domain family 3                                         | protein coding |
| ENSG00000122862 | SRGN         | 10 | 1.14 | 0.01     | -1.21 | 5.00E-04 | -0.63 | 0.18 | serglycin                                                                             | protein coding |
| ENSG0000069399  | BCL3         | 19 | 1.14 | 2.84E-03 | -0.91 | 0.01     | -0.96 | 0.04 | B-cell CLL/lymphoma 3                                                                 | protein coding |
| ENSG00000128335 | APOL2        | 22 | 1.13 | 0.03     | -1.27 | 4.03E-03 | -0.99 | 0.10 | apolipoprotein L2                                                                     | protein coding |

|                 |           |    |      |          |       |          |       |      |                                                                      |                |
|-----------------|-----------|----|------|----------|-------|----------|-------|------|----------------------------------------------------------------------|----------------|
| ENSG00000180992 | MRPL14    | 6  | 1.12 | 4.81E-04 | -0.45 | 0.15     | -0.48 | NA   | mitochondrial ribosomal protein L14                                  | protein coding |
| ENSG0000020633  | RUNX3     | 1  | 1.12 | 3.41E-03 | -1.07 | 1.26E-03 | -1.02 | 0.03 | runt related transcription factor 3                                  | protein coding |
| ENSG0000099860  | GADD45B   | 19 | 1.12 | 0.03     | -0.77 | 0.09     | -1.26 | 0.03 | growth arrest and DNA damage inducible beta                          | protein coding |
| ENSG0000010818  | HIVEP2    | 6  | 1.12 | 0.04     | -1.40 | 1.74E-03 | -1.03 | 0.10 | human immunodeficiency virus type I enhancer binding protein 2       | protein coding |
| ENSG00000119523 | ALG2      | 9  | 1.12 | 0.01     | -0.41 | 0.35     | -0.64 | 0.20 | ALG2, alpha-1,3/1,6-mannosyltransferase                              | protein coding |
| ENSG0000070190  | DAPP1     | 4  | 1.12 | 2.65E-04 | -0.77 | 0.01     | -0.77 | 0.05 | dual adaptor of phosphotyrosine and 3-phosphoinositides 1            | protein coding |
| ENSG00000155760 | FZD7      | 2  | 1.12 | 0.05     | -1.28 | 4.96E-03 | -0.92 | NA   | frizzled class receptor 7                                            | protein coding |
| ENSG00000268804 | LINC02132 | 16 | 1.11 | 0.03     | -1.98 | 4.99E-07 | -0.72 | NA   | long intergenic non-protein coding RNA 2132                          | lincRNA        |
| ENSG00000203760 | CENPW     | 6  | 1.11 | 0.04     | -1.25 | 0.01     | -0.16 | NA   | centromere protein W                                                 | protein coding |
| ENSG00000120526 | NUDCD1    | 8  | 1.11 | 0.02     | -0.88 | 0.04     | -0.89 | 0.11 | NudC domain containing 1                                             | protein coding |
| ENSG0000080371  | RAB21     | 12 | 1.11 | 1.42E-03 | -0.39 | 0.26     | -0.73 | 0.09 | RAB21, member RAS oncogene family                                    | protein coding |
| ENSG00000171552 | BCL2L1    | 20 | 1.10 | 0.01     | -1.44 | 3.07E-05 | -0.86 | 0.08 | BCL2 like 1                                                          | protein coding |
| ENSG00000152749 | GPR180    | 13 | 1.10 | 0.04     | -0.60 | 0.24     | -0.60 | 0.31 | G protein-coupled receptor 180                                       | protein coding |
| ENSG00000155962 | CLIC2     | X  | 1.10 | 0.01     | -1.07 | 1.96E-03 | -0.81 | NA   | chloride intracellular channel 2                                     | protein coding |
| ENSG00000179344 | HLA-DQB1  | 6  | 1.09 | 3.88E-03 | -0.80 | 0.02     | -0.65 | 0.14 | major histocompatibility complex, class II, DQ beta 1                | protein coding |
| ENSG00000117475 | BLZF1     | 1  | 1.09 | 0.03     | -0.93 | 0.03     | -0.87 | 0.12 | basic leucine zipper nuclear factor 1                                | protein coding |
| ENSG00000169604 | ANTXR1    | 2  | 1.09 | 0.05     | -0.92 | 0.04     | -0.33 | NA   | anthrax toxin receptor 1                                             | protein coding |
| ENSG00000160293 | VAV2      | 9  | 1.09 | 0.02     | -0.70 | 0.11     | -0.84 | 0.13 | vav guanine nucleotide exchange factor 2                             | protein coding |
| ENSG00000196116 | TDRD7     | 9  | 1.09 | 0.04     | -1.15 | 0.01     | -0.76 | 0.20 | tudor domain containing 7                                            | protein coding |
| ENSG00000198355 | PIM3      | 22 | 1.09 | 4.75E-03 | -0.58 | 0.11     | -0.65 | 0.15 | Pim-3 proto-oncogene, serine/threonine kinase                        | protein coding |
| ENSG0000025708  | TYMP      | 22 | 1.09 | 0.03     | -1.21 | 3.29E-03 | -0.67 | 0.23 | thymidine phosphorylase                                              | protein coding |
| ENSG00000169181 | GSG1L     | 16 | 1.08 | 0.05     | -0.86 | 0.06     | -0.29 | NA   | GSG1 like                                                            | protein coding |
| ENSG00000108639 | SYNGR2    | 17 | 1.08 | 4.74E-05 | -0.56 | 0.03     | -0.32 | 0.31 | synaptogyrin 2                                                       | protein coding |
| ENSG00000164465 | DCBLD1    | 6  | 1.08 | 0.03     | -0.97 | 0.02     | -1.29 | NA   | discoidin, CUB and LCCL domain containing 1                          | protein coding |
| ENSG00000072682 | P4HA2     | 5  | 1.08 | 0.04     | -1.51 | 4.50E-04 | -0.22 | NA   | prolyl 4-hydroxylase subunit alpha 2                                 | protein coding |
| ENSG00000100220 | RTCB      | 22 | 1.08 | 3.76E-04 | -0.57 | 0.05     | -0.62 | 0.10 | RNA 2',3'-cyclic phosphate and 5'-OH ligase                          | protein coding |
| ENSG00000168672 | FAM84B    | 8  | 1.07 | 0.03     | -1.24 | 2.46E-03 | -0.80 | NA   | family with sequence similarity 84 member B                          | protein coding |
| ENSG00000254087 | LYN       | 8  | 1.07 | 4.09E-04 | -0.46 | 0.12     | -0.52 | 0.15 | LYN proto-oncogene, Src family tyrosine kinase                       | protein coding |
| ENSG0000049449  | RCN1      | 11 | 1.07 | 1.38E-04 | -1.12 | 3.49E-06 | -0.53 | NA   | reticulocalbin 1                                                     | protein coding |
| ENSG00000204264 | PSMB8     | 6  | 1.06 | 0.01     | -1.47 | 8.07E-06 | -0.53 | 0.25 | proteasome subunit beta 8                                            | protein coding |
| ENSG00000105499 | PLA2G4C   | 19 | 1.06 | 0.02     | -1.73 | 1.19E-06 | -0.84 | NA   | phospholipase A2 group IVC                                           | protein coding |
| ENSG00000123609 | NMI       | 2  | 1.05 | 0.05     | -0.94 | 0.04     | -0.93 | 0.12 | N-myc and STAT interactor                                            | protein coding |
| ENSG00000104299 | INTS9     | 8  | 1.05 | 0.01     | -1.42 | 1.28E-05 | -0.86 | 0.07 | integrator complex subunit 9                                         | protein coding |
| ENSG00000204592 | HLA-E     | 6  | 1.04 | 0.02     | -0.66 | 0.09     | -0.60 | 0.22 | major histocompatibility complex, class I, E                         | protein coding |
| ENSG00000076641 | PAG1      | 8  | 1.04 | 1.48E-03 | -0.69 | 0.02     | -0.73 | 0.08 | phosphoprotein membrane anchor with glycosphingolipid microdomains 1 | protein coding |
| ENSG00000137216 | TMEM63B   | 6  | 1.04 | 0.02     | -0.81 | 0.04     | -0.84 | 0.11 | transmembrane protein 63B                                            | protein coding |
| ENSG00000271856 | LINC01215 | 3  | 1.04 | 3.02E-03 | -1.16 | 9.40E-05 | -0.82 | 0.06 | long intergenic non-protein coding RNA 1215                          | lincRNA        |
| ENSG00000105939 | ZC3HAV1   | 7  | 1.04 | 0.01     | -0.26 | 0.52     | -0.94 | 0.04 | zinc finger CCCH-type containing, antiviral 1                        | protein coding |
| ENSG00000262874 | C19orf84  | 19 | 1.03 | 0.03     | -2.54 | 5.47E-11 | -0.81 | NA   | chromosome 19 open reading frame 84                                  | protein coding |
| ENSG00000110324 | IL10RA    | 11 | 1.03 | 0.01     | -0.57 | 0.15     | -0.72 | 0.14 | interleukin 10 receptor subunit alpha                                | protein coding |

|                 |            |    |      |          |       |          |       |      |                                                           |                |
|-----------------|------------|----|------|----------|-------|----------|-------|------|-----------------------------------------------------------|----------------|
| ENSG00000163565 | IFI16      | 1  | 1.03 | 0.05     | -0.90 | 0.04     | -0.77 | 0.18 | interferon gamma inducible protein 16                     | protein coding |
| ENSG00000136816 | TOR1B      | 9  | 1.03 | 0.02     | -0.58 | 0.16     | -0.76 | 0.14 | torsin family 1 member B                                  | protein coding |
| ENSG00000179104 | TMTC2      | 12 | 1.03 | 0.04     | -1.24 | 2.64E-03 | -0.73 | NA   | transmembrane and tetratricopeptide repeat containing 2   | protein coding |
| ENSG00000026751 | SLAMF7     | 1  | 1.03 | 0.02     | -1.48 | 5.26E-05 | -0.79 | 0.13 | SLAM family member 7                                      | protein coding |
| ENSG00000103811 | CTSH       | 15 | 1.03 | 0.01     | -1.60 | 1.79E-07 | -0.47 | 0.28 | cathepsin H                                               | protein coding |
| ENSG00000087253 | LPCAT2     | 16 | 1.02 | 0.02     | -1.32 | 2.86E-04 | -0.60 | NA   | lysophosphatidylcholine acyltransferase 2                 | protein coding |
| ENSG00000168310 | IRF2       | 4  | 1.02 | 4.99E-04 | -1.41 | 1.08E-08 | -0.66 | 0.08 | interferon regulatory factor 2                            | protein coding |
| ENSG00000179840 | PIK3CD-AS1 | 1  | 1.02 | 0.02     | -1.81 | 1.41E-07 | -0.54 | NA   | PIK3CD antisense RNA 1                                    | antisense      |
| ENSG00000154642 | C21orf91   | 21 | 1.02 | 0.01     | -0.67 | 0.06     | -0.64 | 0.16 | chromosome 21 open reading frame 91                       | protein coding |
| ENSG00000197122 | SRC        | 20 | 1.02 | 4.87E-03 | -0.87 | 0.01     | -0.74 | 0.09 | SRC proto-oncogene, non-receptor tyrosine kinase          | protein coding |
| ENSG00000112773 | FAM46A     | 6  | 1.01 | 2.18E-03 | -0.77 | 0.01     | -0.65 | 0.10 | family with sequence similarity 46 member A               | protein coding |
| ENSG00000154640 | BTG3       | 21 | 1.01 | 0.02     | -0.58 | 0.13     | -0.92 | NA   | BTG anti-proliferation factor 3                           | protein coding |
| ENSG00000125898 | FAM110A    | 20 | 1.01 | 1.71E-04 | -0.86 | 2.75E-04 | -0.54 | NA   | family with sequence similarity 110 member A              | protein coding |
| ENSG00000176102 | CSTF3      | 11 | 1.01 | 0.01     | -0.03 | 0.96     | -0.76 | 0.10 | cleavage stimulation factor subunit 3                     | protein coding |
| ENSG00000151651 | ADAM8      | 10 | 1.00 | 0.01     | -1.51 | 6.20E-07 | -0.75 | NA   | ADAM metalloproteinase domain 8                           | protein coding |
| ENSG00000133639 | BTG1       | 12 | 1.00 | 0.01     | -0.29 | 0.45     | -0.74 | 0.10 | BTG anti-proliferation factor 1                           | protein coding |
| ENSG00000137449 | CPEB2      | 4  | 1.00 | 0.04     | -0.87 | 0.04     | -0.52 | NA   | cytoplasmic polyadenylation element binding protein 2     | protein coding |
| ENSG00000064651 | SLC12A2    | 5  | 0.99 | 0.04     | -1.51 | 7.49E-05 | -0.89 | 0.10 | solute carrier family 12 member 2                         | protein coding |
| ENSG00000154721 | JAM2       | 21 | 0.99 | 0.01     | -1.39 | 2.79E-05 | -0.77 | NA   | junctional adhesion molecule 2                            | protein coding |
| ENSG00000145365 | TIFA       | 4  | 0.99 | 8.79E-05 | -0.47 | 0.05     | -0.60 | 0.07 | TRAF interacting protein with forkhead associated domain  | protein coding |
| ENSG00000140548 | ZNF710     | 15 | 0.99 | 3.97E-03 | -1.29 | 5.98E-06 | -0.77 | 0.07 | zinc finger protein 710                                   | protein coding |
| ENSG00000239713 | APOBEC3G   | 22 | 0.98 | 3.12E-04 | -1.30 | 1.29E-08 | -0.73 | 0.03 | apolipoprotein B mRNA editing enzyme catalytic subunit 3G | protein coding |
| ENSG00000067221 | STOML1     | 15 | 0.98 | 0.01     | -0.46 | 0.17     | -0.58 | NA   | stomatin like 1                                           | protein coding |
| ENSG00000172345 | STARD5     | 15 | 0.98 | 0.02     | -0.69 | 0.07     | -1.38 | NA   | StAR related lipid transfer domain containing 5           | protein coding |
| ENSG00000106560 | GIMAP2     | 7  | 0.98 | 4.81E-04 | -0.66 | 0.01     | -0.52 | NA   | GTPase, IMAP family member 2                              | protein coding |
| ENSG00000171631 | P2RY6      | 11 | 0.97 | 0.02     | -1.15 | 6.00E-04 | -0.71 | 0.13 | pyrimidinergic receptor P2Y6                              | protein coding |
| ENSG00000069974 | RAB27A     | 15 | 0.96 | 0.03     | -1.28 | 3.47E-04 | -0.65 | NA   | RAB27A, member RAS oncogene family                        | protein coding |
| ENSG00000140105 | WARS       | 14 | 0.96 | 0.01     | -0.22 | 0.57     | -0.60 | 0.14 | tryptophanyl-tRNA synthetase                              | protein coding |
| ENSG00000124508 | BTN2A2     | 6  | 0.96 | 0.01     | -1.42 | 9.77E-07 | -0.77 | 0.07 | butyrophilin subfamily 2 member A2                        | protein coding |
| ENSG00000102218 | RP2        | X  | 0.95 | 0.01     | -0.46 | 0.20     | -0.53 | 0.22 | retinitis pigmentosa 2 (X-linked recessive)               | protein coding |
| ENSG00000108829 | LRR59      | 17 | 0.95 | 0.02     | -0.33 | 0.41     | -0.53 | 0.24 | leucine rich repeat containing 59                         | protein coding |
| ENSG00000086061 | DNAJA1     | 9  | 0.95 | 0.01     | -0.93 | 2.93E-03 | -0.72 | 0.10 | DnaJ heat shock protein family (Hsp40) member A1          | protein coding |
| ENSG00000072415 | MPP5       | 14 | 0.95 | 3.88E-03 | -0.24 | 0.48     | -0.64 | NA   | membrane palmitoylated protein 5                          | protein coding |
| ENSG00000138670 | RASGEF1B   | 4  | 0.95 | 0.03     | -0.76 | 0.04     | -0.79 | 0.11 | RasGEF domain family member 1B                            | protein coding |
| ENSG00000206503 | HLA-A      | 6  | 0.95 | 2.76E-03 | -1.08 | 6.97E-05 | -0.38 | 0.30 | major histocompatibility complex, class I, A              | protein coding |
| ENSG00000117143 | UAP1       | 1  | 0.95 | 0.05     | -0.59 | 0.18     | -0.93 | 0.10 | UDP-N-acetylglucosamine pyrophosphorylase 1               | protein coding |
| ENSG00000178078 | STAP2      | 19 | 0.94 | 0.03     | -1.18 | 6.50E-04 | -0.34 | NA   | signal transducing adaptor family member 2                | protein coding |
| ENSG00000198369 | SPRED2     | 2  | 0.94 | 0.03     | -1.09 | 2.00E-03 | -0.71 | 0.14 | sprouty related EVH1 domain containing 2                  | protein coding |
| ENSG00000106266 | SNX8       | 7  | 0.94 | 1.18E-03 | -0.98 | 7.49E-05 | -0.29 | NA   | sorting nexin 8                                           | protein coding |
| ENSG00000139180 | NDUFA9     | 12 | 0.94 | 0.02     | -0.45 | 0.23     | -0.67 | NA   | NADH:ubiquinone oxidoreductase subunit A9                 | protein coding |
| ENSG00000171161 | ZNF672     | 1  | 0.93 | 4.81E-04 | -1.03 | 8.51E-06 | -0.53 | 0.11 | zinc finger protein 672                                   | protein coding |

|                 |          |    |      |          |       |          |       |      |                                                     |                |
|-----------------|----------|----|------|----------|-------|----------|-------|------|-----------------------------------------------------|----------------|
| ENSG00000109971 | HSPA8    | 11 | 0.93 | 0.03     | -0.98 | 0.01     | -0.54 | 0.25 | heat shock protein family A (Hsp70) member 8        | protein coding |
| ENSG00000096384 | HSP90AB1 | 6  | 0.93 | 0.02     | -0.59 | 0.09     | -0.58 | 0.19 | heat shock protein 90 alpha family class B member 1 | protein coding |
| ENSG00000065054 | SLC9A3R2 | 16 | 0.93 | 6.74E-04 | -0.59 | 0.02     | -0.55 | 0.10 | SLC9A3 regulator 2                                  | protein coding |
| ENSG00000134802 | SLC43A3  | 11 | 0.93 | 0.01     | -1.15 | 1.52E-04 | -0.55 | 0.19 | solute carrier family 43 member 3                   | protein coding |
| ENSG00000118503 | TNFAIP3  | 6  | 0.92 | 3.10E-03 | -0.85 | 1.69E-03 | -0.78 | 0.04 | TNF alpha induced protein 3                         | protein coding |
| ENSG00000102221 | JADE3    | X  | 0.92 | 4.87E-03 | -0.59 | 0.05     | -0.50 | 0.19 | jade family PHD finger 3                            | protein coding |
| ENSG00000158470 | B4GALT5  | 20 | 0.92 | 2.36E-03 | -0.46 | 0.11     | -0.69 | 0.07 | beta-1,4-galactosyltransferase 5                    | protein coding |
| ENSG00000160710 | ADAR     | 1  | 0.91 | 0.04     | -0.42 | 0.34     | -0.55 | 0.26 | adenosine deaminase, RNA specific                   | protein coding |
| ENSG00000177426 | TGIF1    | 18 | 0.91 | 0.05     | -1.15 | 2.38E-03 | -0.55 | NA   | TGFB induced factor homeobox 1                      | protein coding |
| ENSG00000213516 | RBMXL1   | 1  | 0.91 | 0.02     | -0.57 | 0.11     | -0.39 | NA   | RNA binding motif protein, X-linked like 1          | protein coding |
| ENSG00000085063 | CD59     | 11 | 0.90 | 1.32E-03 | -0.85 | 4.69E-04 | -0.39 | 0.23 | CD59 molecule                                       | protein coding |
| ENSG00000153029 | MR1      | 1  | 0.89 | 0.05     | -0.38 | 0.39     | -0.66 | 0.19 | major histocompatibility complex, class I-related   | protein coding |
| ENSG00000254685 | FPGT     | 1  | 0.89 | 0.01     | -0.75 | 0.01     | -0.33 | NA   | fucose-1-phosphate guanylyltransferase              | protein coding |
| ENSG00000188042 | ARL4C    | 2  | 0.89 | 6.82E-04 | -0.83 | 3.42E-04 | -0.68 | 0.04 | ADP ribosylation factor like GTPase 4C              | protein coding |
| ENSG00000136732 | GYPC     | 2  | 0.89 | 0.01     | -1.07 | 3.81E-04 | -0.31 | NA   | glycophorin C (Gerbich blood group)                 | protein coding |
| ENSG00000115956 | PLEK     | 2  | 0.89 | 2.27E-06 | -0.47 | 0.01     | -0.35 | 0.14 | pleckstrin                                          | protein coding |
| ENSG00000185262 | UBALD2   | 17 | 0.88 | 0.01     | -0.65 | 0.04     | -0.44 | 0.27 | UBA like domain containing 2                        | protein coding |
| ENSG00000161791 | FMNL3    | 12 | 0.87 | 4.35E-03 | -0.38 | 0.20     | -0.64 | 0.09 | formin like 3                                       | protein coding |
| ENSG00000176087 | SLC35A4  | 5  | 0.87 | 0.01     | -0.80 | 3.52E-03 | -0.42 | 0.25 | solute carrier family 35 member A4                  | protein coding |
| ENSG00000106078 | COBL     | 7  | 0.87 | 0.05     | -1.46 | 2.86E-05 | -0.79 | 0.12 | cordon-bleu WH2 repeat protein                      | protein coding |
| ENSG00000100911 | PSME2    | 14 | 0.87 | 0.02     | -0.86 | 0.01     | -0.31 | 0.46 | proteasome activator subunit 2                      | protein coding |
| ENSG00000173926 | MARCH3   | 5  | 0.86 | 0.05     | -1.27 | 2.85E-04 | -1.20 | NA   | membrane associated ring-CH-type finger 3           | protein coding |
| ENSG00000135211 | TMEM60   | 7  | 0.86 | 2.68E-03 | -0.16 | 0.60     | -0.21 | NA   | transmembrane protein 60                            | protein coding |
| ENSG00000197872 | FAM49A   | 2  | 0.86 | 2.32E-03 | -0.14 | 0.67     | -0.61 | 0.08 | family with sequence similarity 49 member A         | protein coding |
| ENSG00000173917 | HOXB2    | 17 | 0.86 | 1.32E-03 | -1.21 | 4.28E-08 | -1.14 | NA   | homeobox B2                                         | protein coding |
| ENSG00000144655 | CSRNP1   | 3  | 0.86 | 0.01     | -0.27 | 0.44     | -0.61 | 0.13 | cysteine and serine rich nuclear protein 1          | protein coding |
| ENSG00000145901 | TNIP1    | 5  | 0.85 | 2.63E-04 | -0.13 | 0.63     | -0.43 | 0.14 | TNFAIP3 interacting protein 1                       | protein coding |
| ENSG00000116670 | MAD2L2   | 1  | 0.85 | 1.46E-05 | -0.72 | 4.12E-05 | -0.38 | 0.12 | MAD2 mitotic arrest deficient-like 2 (yeast)        | protein coding |
| ENSG00000173264 | GPR137   | 11 | 0.85 | 9.80E-04 | -0.84 | 1.49E-04 | -0.16 | 0.61 | G protein-coupled receptor 137                      | protein coding |
| ENSG00000196387 | ZNF140   | 12 | 0.84 | 0.01     | -0.35 | 0.25     | -0.51 | NA   | zinc finger protein 140                             | protein coding |
| ENSG00000174125 | TLR1     | 4  | 0.84 | 1.36E-04 | -0.68 | 5.09E-04 | -0.43 | NA   | toll like receptor 1                                | protein coding |
| ENSG00000167136 | ENDOG    | 9  | 0.84 | 0.03     | -1.29 | 4.91E-05 | -0.54 | 0.22 | endonuclease G                                      | protein coding |
| ENSG00000135363 | LMO2     | 11 | 0.84 | 0.01     | -1.93 | 3.01E-13 | -0.62 | NA   | LIM domain only 2                                   | protein coding |
| ENSG00000173517 | PEAK1    | 15 | 0.84 | 0.05     | -1.44 | 1.85E-05 | -0.89 | 0.07 | pseudopodium enriched atypical kinase 1             | protein coding |
| ENSG00000234745 | HLA-B    | 6  | 0.83 | 2.81E-03 | -0.40 | 0.14     | -0.22 | 0.49 | major histocompatibility complex, class I, B        | protein coding |
| ENSG00000167208 | SNX20    | 16 | 0.83 | 1.44E-04 | -0.94 | 5.19E-07 | -0.49 | 0.08 | sorting nexin 20                                    | protein coding |
| ENSG00000158457 | TSPAN33  | 7  | 0.83 | 0.01     | -0.31 | 0.36     | -0.34 | 0.36 | tetraspanin 33                                      | protein coding |
| ENSG00000100097 | LGALS1   | 22 | 0.82 | 0.01     | -1.34 | 5.13E-07 | -0.14 | 0.73 | galectin 1                                          | protein coding |
| ENSG00000106591 | MRPL32   | 7  | 0.82 | 0.01     | -0.35 | 0.27     | -0.65 | NA   | mitochondrial ribosomal protein L32                 | protein coding |
| ENSG00000100084 | HIRA     | 22 | 0.82 | 0.05     | -0.59 | 0.11     | -0.66 | NA   | histone cell cycle regulator                        | protein coding |
| ENSG00000180817 | PPA1     | 10 | 0.82 | 0.05     | -0.56 | 0.13     | -0.47 | 0.30 | pyrophosphatase (inorganic) 1                       | protein coding |
| ENSG00000173171 | MTX1     | 1  | 0.81 | 0.03     | -0.02 | 0.97     | -0.15 | NA   | metaxin 1                                           | protein coding |



|                 |          |    |      |          |       |          |       |      |                                                              |                                    |
|-----------------|----------|----|------|----------|-------|----------|-------|------|--------------------------------------------------------------|------------------------------------|
| ENSG00000120675 | DNAJC15  | 13 | 0.81 | 0.02     | -0.25 | 0.50     | -0.33 | NA   | DnaJ heat shock protein family (Hsp40) member C15            | protein coding                     |
| ENSG00000087086 | FTL      | 19 | 0.81 | 0.01     | -0.97 | 2.90E-04 | -0.45 | 0.22 | ferritin light chain                                         | protein coding                     |
| ENSG00000128973 | CLN6     | 15 | 0.81 | 0.01     | -1.09 | 4.06E-05 | -0.44 | NA   | ceroid-lipofuscinosis, neuronal 6, late infantile, variant   | protein coding                     |
| ENSG00000143156 | NME7     | 1  | 0.81 | 0.02     | -0.36 | 0.26     | -0.25 | NA   | NME/NM23 family member 7                                     | protein coding                     |
| ENSG00000115919 | KYNU     | 2  | 0.81 | 0.02     | -0.75 | 0.01     | -0.42 | 0.28 | kynureninase                                                 | protein coding                     |
| ENSG00000227507 | LTB      | 6  | 0.81 | 2.91E-05 | -1.28 | 3.21E-15 | -0.25 | 0.30 | lymphotoxin beta                                             | protein coding                     |
| ENSG00000160602 | NEK8     | 17 | 0.81 | 0.05     | -1.06 | 1.43E-03 | -0.77 | 0.10 | NIMA related kinase 8                                        | protein coding                     |
| ENSG00000100403 | ZC3H7B   | 22 | 0.80 | 0.02     | -0.63 | 0.03     | -0.76 | 0.06 | zinc finger CCCH-type containing 7B                          | protein coding                     |
| ENSG00000259431 | THTPA    | 14 | 0.80 | 0.03     | -0.83 | 0.01     | -0.54 | NA   | thiamine triphosphatase                                      | protein coding                     |
| ENSG00000166710 | B2M      | 15 | 0.80 | 0.01     | -0.42 | 0.17     | -0.27 | 0.46 | beta-2-microglobulin                                         | protein coding                     |
| ENSG00000092203 | TOX4     | 14 | 0.80 | 0.03     | -0.75 | 0.02     | -0.60 | 0.14 | TOX high mobility group box family member 4                  | protein coding                     |
| ENSG00000062194 | GPBP1    | 5  | 0.79 | 0.04     | -0.59 | 0.08     | -0.77 | 0.08 | GC-rich promoter binding protein 1                           | protein coding                     |
| ENSG00000115271 | GCA      | 2  | 0.79 | 0.01     | -1.02 | 6.97E-05 | -0.53 | NA   | grancalcin                                                   | protein coding                     |
| ENSG00000173163 | COMMD1   | 2  | 0.79 | 0.01     | -0.59 | 0.02     | -0.30 | NA   | copper metabolism domain containing 1                        | protein coding                     |
| ENSG00000085117 | CD82     | 11 | 0.79 | 0.01     | -0.39 | 0.17     | -0.25 | 0.45 | CD82 molecule                                                | protein coding                     |
| ENSG00000124789 | NUP153   | 6  | 0.79 | 0.01     | -0.76 | 4.40E-03 | -0.58 | 0.11 | nucleoporin 153                                              | protein coding                     |
| ENSG00000213719 | CLIC1    | 6  | 0.79 | 0.04     | -0.56 | 0.10     | -0.26 | 0.53 | chloride intracellular channel 1                             | protein coding                     |
| ENSG00000120533 | ENY2     | 8  | 0.79 | 0.01     | -0.30 | 0.33     | -0.54 | 0.13 | ENY2, transcription and export complex 2 subunit             | protein coding                     |
| ENSG00000198736 | MSRB1    | 16 | 0.79 | 0.01     | -0.29 | 0.32     | -0.42 | 0.21 | methionine sulfoxide reductase B1                            | protein coding                     |
| ENSG00000015475 | BID      | 22 | 0.78 | 0.01     | -0.64 | 0.01     | -0.41 | 0.22 | BH3 interacting domain death agonist                         | protein coding                     |
| ENSG00000196664 | TLR7     | X  | 0.78 | 0.03     | -0.30 | 0.42     | -0.41 | 0.30 | toll like receptor 7                                         | protein coding                     |
| ENSG00000168610 | STAT3    | 17 | 0.78 | 0.02     | -0.88 | 1.32E-03 | -0.62 | 0.11 | signal transducer and activator of transcription 3           | protein coding                     |
| ENSG00000151748 | SAV1     | 14 | 0.78 | 1.07E-03 | -0.50 | 0.02     | -0.47 | 0.11 | salvador family WW domain containing protein 1               | protein coding                     |
| ENSG00000172936 | MYD88    | 3  | 0.78 | 0.05     | -0.54 | 0.13     | -0.41 | 0.33 | myeloid differentiation primary response 88                  | protein coding                     |
| ENSG00000083799 | CYLD     | 16 | 0.78 | 2.68E-03 | -0.58 | 0.01     | -0.59 | 0.07 | CYLD lysine 63 deubiquitinase                                | protein coding                     |
| ENSG00000263563 | UBBP4    | 17 | 0.78 | 0.01     | -0.48 | 0.08     | -0.33 | NA   | ubiquitin B pseudogene 4                                     | transcribed unprocessed pseudogene |
| ENSG00000104825 | NFKBIB   | 19 | 0.78 | 0.02     | -0.51 | 0.09     | -0.60 | 0.12 | NFKB inhibitor beta                                          | protein coding                     |
| ENSG00000276045 | ORAI1    | 12 | 0.77 | 3.34E-03 | -0.43 | 0.08     | -0.07 | 0.84 | ORAI calcium release-activated calcium modulator 1           | protein coding                     |
| ENSG00000132507 | EIF5A    | 17 | 0.77 | 2.76E-03 | -0.35 | 0.16     | -0.24 | 0.42 | eukaryotic translation initiation factor 5A                  | protein coding                     |
| ENSG00000065427 | KARS     | 16 | 0.77 | 0.02     | -0.50 | 0.10     | -0.39 | 0.30 | lysyl-tRNA synthetase                                        | protein coding                     |
| ENSG00000110756 | HPS5     | 11 | 0.77 | 0.01     | -0.54 | 0.04     | -0.57 | 0.10 | HPS5, biogenesis of lysosomal organelles complex 2 subunit 2 | protein coding                     |
| ENSG00000163389 | POGLUT1  | 3  | 0.77 | 0.05     | -1.14 | 2.58E-04 | -0.73 | 0.10 | protein O-glucosyltransferase 1                              | protein coding                     |
| ENSG00000178741 | COX5A    | 15 | 0.77 | 0.04     | -0.64 | 0.05     | -0.31 | 0.45 | cytochrome c oxidase subunit 5A                              | protein coding                     |
| ENSG00000003400 | CASP10   | 2  | 0.76 | 0.03     | -0.99 | 7.55E-04 | -0.67 | 0.10 | caspase 10                                                   | protein coding                     |
| ENSG00000145088 | EAF2     | 3  | 0.76 | 0.03     | -2.27 | 4.52E-16 | -0.20 | NA   | ELL associated factor 2                                      | protein coding                     |
| ENSG00000106153 | CHCHD2   | 7  | 0.76 | 0.02     | -0.16 | 0.65     | -0.13 | 0.73 | coiled-coil-helix-coiled-coil-helix domain containing 2      | protein coding                     |
| ENSG00000253276 | CCDC71L  | 7  | 0.75 | 5.63E-05 | -0.78 | 1.11E-06 | -0.59 | 0.01 | coiled-coil domain containing 71-like                        | protein coding                     |
| ENSG00000138639 | ARHGAP24 | 4  | 0.75 | 0.01     | -1.19 | 7.47E-07 | -0.36 | NA   | Rho GTPase activating protein 24                             | protein coding                     |
| ENSG00000127666 | TICAM1   | 19 | 0.75 | 0.01     | -0.33 | 0.22     | -0.56 | 0.10 | toll like receptor adaptor molecule 1                        | protein coding                     |

|                |          |    |      |          |       |          |       |      |                                                    |                |
|----------------|----------|----|------|----------|-------|----------|-------|------|----------------------------------------------------|----------------|
| ENSG0000067182 | TNFRSF1A | 12 | 0.75 | 0.01     | -0.32 | 0.24     | -0.43 | 0.19 | TNF receptor superfamily member 1A                 | protein coding |
| ENSG0000103018 | CYB5B    | 16 | 0.75 | 3.98E-03 | -0.02 | 0.96     | -0.20 | 0.50 | cytochrome b5 type B                               | protein coding |
| ENSG0000168389 | MFSD2A   | 1  | 0.74 | 0.03     | -0.50 | 0.10     | -0.48 | 0.20 | major facilitator superfamily domain containing 2A | protein coding |
| ENSG0000105518 | TMEM205  | 19 | 0.74 | 0.01     | -0.52 | 0.05     | -0.30 | NA   | transmembrane protein 205                          | protein coding |
| ENSG0000138785 | INTS12   | 4  | 0.74 | 0.05     | -0.64 | 0.05     | -0.71 | 0.10 | integrator complex subunit 12                      | protein coding |
| ENSG0000092820 | EZR      | 6  | 0.74 | 0.03     | -1.05 | 1.37E-04 | -0.53 | 0.16 | ezrin                                              | protein coding |
| ENSG0000132963 | POMP     | 13 | 0.74 | 0.03     | -0.23 | 0.53     | -0.40 | 0.29 | proteasome maturation protein                      | protein coding |
| ENSG0000031081 | ARHGAP31 | 3  | 0.74 | 1.55E-03 | -0.04 | 0.89     | -0.38 | 0.17 | Rho GTPase activating protein 31                   | protein coding |
| ENSG0000176531 | PHLDB3   | 19 | 0.73 | 0.01     | -0.74 | 1.53E-03 | -0.42 | NA   | pleckstrin homology like domain family B member 3  | protein coding |
| ENSG0000162144 | CYB561A3 | 11 | 0.73 | 0.01     | -0.28 | 0.29     | -0.06 | 0.86 | cytochrome b561 family member A3                   | protein coding |
| ENSG0000172115 | CYCS     | 7  | 0.73 | 0.03     | -0.32 | 0.34     | -0.39 | 0.29 | cytochrome c, somatic                              | protein coding |
| ENSG0000129255 | MPDU1    | 17 | 0.73 | 2.17E-03 | -0.64 | 2.02E-03 | -0.29 | 0.28 | mannose-P-dolichol utilization defect 1            | protein coding |
| ENSG0000181026 | AEN      | 15 | 0.73 | 3.61E-03 | 0.10  | 0.72     | -0.31 | 0.28 | apoptosis enhancing nuclease                       | protein coding |
| ENSG0000104325 | DECR1    | 8  | 0.73 | 0.02     | -0.69 | 0.01     | -0.47 | 0.19 | 2,4-dienoyl-CoA reductase 1                        | protein coding |
| ENSG0000183617 | MRPL54   | 19 | 0.73 | 0.02     | -0.14 | 0.69     | -0.09 | NA   | mitochondrial ribosomal protein L54                | protein coding |
| ENSG0000173801 | JUP      | 17 | 0.72 | 0.01     | -1.46 | 1.28E-10 | -0.55 | 0.11 | junction plakoglobin                               | protein coding |
| ENSG0000126457 | PRMT1    | 19 | 0.72 | 5.67E-04 | -0.51 | 0.01     | -0.19 | 0.42 | protein arginine methyltransferase 1               | protein coding |
| ENSG0000131174 | COX7B    | X  | 0.72 | 0.01     | -0.10 | 0.75     | -0.28 | 0.38 | cytochrome c oxidase subunit 7B                    | protein coding |
| ENSG0000150459 | SAP18    | 13 | 0.71 | 0.03     | -0.03 | 0.94     | -0.43 | 0.23 | Sin3A associated protein 18                        | protein coding |
| ENSG0000102393 | GLA      | X  | 0.71 | 0.02     | -0.50 | 0.07     | -0.20 | 0.57 | galactosidase alpha                                | protein coding |
| ENSG0000100226 | GTPBP1   | 22 | 0.71 | 0.05     | -0.80 | 0.01     | -0.55 | 0.17 | GTP binding protein 1                              | protein coding |
| ENSG0000123595 | RAB9A    | X  | 0.71 | 4.75E-03 | -0.36 | 0.13     | -0.37 | 0.19 | RAB9A, member RAS oncogene family                  | protein coding |
| ENSG0000164163 | ABCE1    | 4  | 0.71 | 0.01     | -0.61 | 0.01     | -0.40 | 0.22 | ATP binding cassette subfamily E member 1          | protein coding |
| ENSG0000136560 | TANK     | 2  | 0.70 | 0.03     | -0.60 | 0.03     | -0.64 | 0.08 | TRAF family member associated NFKB activator       | protein coding |
| ENSG0000083635 | NUFIP1   | 13 | 0.70 | 0.01     | -0.02 | 0.95     | -0.38 | NA   | NUFIP1, FMR1 interacting protein 1                 | protein coding |
| ENSG0000100567 | PSMA3    | 14 | 0.70 | 0.03     | -0.59 | 0.03     | -0.42 | 0.23 | proteasome subunit alpha 3                         | protein coding |
| ENSG0000169504 | CLIC4    | 1  | 0.70 | 4.64E-03 | -0.10 | 0.74     | -0.19 | 0.50 | chloride intracellular channel 4                   | protein coding |
| ENSG0000156515 | HK1      | 10 | 0.70 | 0.05     | -0.50 | 0.10     | -0.44 | 0.25 | hexokinase 1                                       | protein coding |
| ENSG0000126945 | HNRNP2   | X  | 0.69 | 0.02     | -1.21 | 3.42E-07 | -0.51 | 0.14 | heterogeneous nuclear ribonucleoprotein H2         | protein coding |
| ENSG0000162734 | PEA15    | 1  | 0.69 | 3.11E-03 | -0.30 | 0.19     | -0.33 | 0.22 | phosphoprotein enriched in astrocytes 15           | protein coding |
| ENSG0000129084 | PSMA1    | 11 | 0.69 | 0.01     | -0.34 | 0.16     | -0.24 | NA   | proteasome subunit alpha 1                         | protein coding |
| ENSG0000109606 | DHX15    | 4  | 0.68 | 0.02     | -0.44 | 0.10     | -0.51 | 0.13 | DEAH-box helicase 15                               | protein coding |
| ENSG0000100804 | PSMB5    | 14 | 0.68 | 0.04     | 0.28  | 0.39     | 0.04  | 0.92 | proteasome subunit beta 5                          | protein coding |
| ENSG0000018699 | TTC27    | 2  | 0.68 | 0.02     | -0.75 | 1.44E-03 | -0.48 | NA   | tetratricopeptide repeat domain 27                 | protein coding |
| ENSG0000147168 | IL2RG    | X  | 0.68 | 4.81E-04 | -1.17 | 2.54E-13 | -0.36 | 0.14 | interleukin 2 receptor subunit gamma               | protein coding |
| ENSG0000013364 | MVP      | 16 | 0.68 | 0.04     | -0.46 | 0.11     | -0.19 | 0.59 | major vault protein                                | protein coding |
| ENSG0000182481 | KPNA2    | 17 | 0.67 | 0.02     | -0.08 | 0.81     | -0.27 | 0.40 | karyopherin subunit alpha 2                        | protein coding |
| ENSG0000137522 | RNF121   | 11 | 0.67 | 0.02     | -0.88 | 2.03E-04 | -0.45 | 0.17 | ring finger protein 121                            | protein coding |
| ENSG0000149547 | EI24     | 11 | 0.67 | 0.01     | -0.21 | 0.45     | -0.37 | 0.23 | EI24, autophagy associated transmembrane protein   | protein coding |
| ENSG0000100749 | VRK1     | 14 | 0.67 | 0.02     | -0.44 | 0.09     | -0.18 | NA   | vaccinia related kinase 1                          | protein coding |
| ENSG0000185291 | IL3RA    | X  | 0.67 | 3.91E-03 | -0.93 | 1.09E-06 | -0.27 | 0.30 | interleukin 3 receptor subunit alpha               | protein coding |
| ENSG0000139505 | MTMR6    | 13 | 0.67 | 0.02     | -0.54 | 0.03     | -0.28 | 0.39 | myotubularin related protein 6                     | protein coding |

|                 |          |    |      |          |       |          |       |      |                                                                    |                |
|-----------------|----------|----|------|----------|-------|----------|-------|------|--------------------------------------------------------------------|----------------|
| ENSG00000133065 | SLC41A1  | 1  | 0.67 | 0.04     | -1.20 | 3.61E-06 | -0.53 | NA   | solute carrier family 41 member 1                                  | protein coding |
| ENSG00000051108 | HERPUD1  | 16 | 0.67 | 0.01     | 0.07  | 0.81     | -0.27 | 0.34 | homocysteine inducible ER protein with ubiquitin like domain 1     | protein coding |
| ENSG00000164305 | CASP3    | 4  | 0.67 | 0.01     | -0.33 | 0.16     | -0.46 | 0.12 | caspase 3                                                          | protein coding |
| ENSG00000138279 | ANXA7    | 10 | 0.66 | 2.47E-04 | -0.65 | 4.12E-05 | -0.34 | 0.12 | annexin A7                                                         | protein coding |
| ENSG00000231925 | TAPBP    | 6  | 0.66 | 2.17E-03 | -0.65 | 4.71E-04 | -0.34 | 0.18 | TAP binding protein                                                | protein coding |
| ENSG00000173812 | EIF1     | 17 | 0.66 | 0.01     | -0.18 | 0.51     | -0.36 | 0.22 | eukaryotic translation initiation factor 1                         | protein coding |
| ENSG00000143106 | PSMA5    | 1  | 0.66 | 0.02     | -0.43 | 0.10     | -0.29 | 0.36 | proteasome subunit alpha 5                                         | protein coding |
| ENSG00000143514 | TP53BP2  | 1  | 0.66 | 0.02     | -0.60 | 0.01     | -0.53 | 0.10 | tumor protein p53 binding protein 2                                | protein coding |
| ENSG00000116473 | RAP1A    | 1  | 0.66 | 4.81E-04 | -0.45 | 0.01     | -0.41 | 0.08 | RAP1A, member of RAS oncogene family                               | protein coding |
| ENSG00000196126 | HLA-DRB1 | 6  | 0.65 | 0.05     | -0.57 | 0.04     | -0.34 | 0.33 | major histocompatibility complex, class II, DR beta 1              | protein coding |
| ENSG00000040531 | CTNS     | 17 | 0.65 | 0.04     | -0.33 | 0.29     | -0.50 | 0.17 | cystinosin, lysosomal cystine transporter                          | protein coding |
| ENSG00000099875 | MKNK2    | 19 | 0.65 | 0.03     | -0.55 | 0.04     | -0.44 | 0.20 | MAP kinase interacting serine/threonine kinase 2                   | protein coding |
| ENSG00000125651 | GTF2F1   | 19 | 0.65 | 3.92E-03 | -0.17 | 0.50     | -0.31 | 0.24 | general transcription factor IIF subunit 1                         | protein coding |
| ENSG00000145780 | FEM1C    | 5  | 0.65 | 0.03     | -0.37 | 0.18     | -0.46 | NA   | fem-1 homolog C                                                    | protein coding |
| ENSG00000043143 | JADE2    | 5  | 0.65 | 0.02     | -1.44 | 8.54E-11 | -0.50 | 0.13 | jade family PHD finger 2                                           | protein coding |
| ENSG00000121774 | KHDRBS1  | 1  | 0.65 | 0.02     | -1.58 | 1.63E-13 | -0.50 | 0.12 | KH RNA binding domain containing, signal transduction associated 1 | protein coding |
| ENSG00000143368 | SF3B4    | 1  | 0.65 | 9.18E-04 | -0.14 | 0.50     | -0.24 | 0.29 | splicing factor 3b subunit 4                                       | protein coding |
| ENSG00000136490 | LIMD2    | 17 | 0.65 | 4.34E-04 | -0.87 | 1.34E-08 | -0.40 | 0.08 | LIM domain containing 2                                            | protein coding |
| ENSG00000143390 | RFX5     | 1  | 0.65 | 0.05     | -1.16 | 6.15E-06 | -0.67 | 0.08 | regulatory factor X5                                               | protein coding |
| ENSG00000108622 | ICAM2    | 17 | 0.64 | 0.01     | -0.50 | 0.03     | -0.30 | 0.30 | intercellular adhesion molecule 2                                  | protein coding |
| ENSG00000205208 | C4orf46  | 4  | 0.64 | 0.05     | -1.31 | 2.89E-07 | -0.34 | NA   | chromosome 4 open reading frame 46                                 | protein coding |
| ENSG00000139496 | NUP58    | 13 | 0.64 | 0.02     | -0.43 | 0.09     | -0.46 | 0.15 | nucleoporin 58                                                     | protein coding |
| ENSG00000109332 | UBE2D3   | 4  | 0.64 | 0.03     | -0.24 | 0.42     | -0.36 | 0.27 | ubiquitin conjugating enzyme E2 D3                                 | protein coding |
| ENSG00000112578 | BYSL     | 6  | 0.64 | 0.01     | 0.50  | 0.02     | -0.27 | NA   | bystin like                                                        | protein coding |
| ENSG00000136908 | DPM2     | 9  | 0.63 | 0.01     | -0.31 | 0.14     | -0.28 | NA   | dolichyl-phosphate mannosyltransferase subunit 2, regulatory       | protein coding |
| ENSG00000277791 | PSMB3    | 17 | 0.63 | 0.02     | -0.02 | 0.95     | -0.13 | 0.68 | proteasome subunit beta 3                                          | protein coding |
| ENSG00000146834 | MEPCE    | 7  | 0.63 | 3.41E-03 | -0.89 | 5.36E-07 | -0.35 | 0.17 | methylphosphate capping enzyme                                     | protein coding |
| ENSG00000181481 | RNF135   | 17 | 0.63 | 0.02     | -0.11 | 0.69     | -0.37 | NA   | ring finger protein 135                                            | protein coding |
| ENSG00000120725 | SIL1     | 5  | 0.63 | 0.02     | -0.65 | 3.08E-03 | -0.36 | NA   | SIL1 nucleotide exchange factor                                    | protein coding |
| ENSG00000139192 | TAPBPL   | 12 | 0.63 | 0.05     | -1.33 | 4.80E-08 | -0.47 | NA   | TAP binding protein like                                           | protein coding |
| ENSG00000154978 | VOPP1    | 7  | 0.63 | 3.16E-03 | -0.39 | 0.05     | -0.06 | 0.83 | vesicular, overexpressed in cancer, prosurvival protein 1          | protein coding |
| ENSG00000111912 | NCOA7    | 6  | 0.63 | 0.03     | -0.67 | 0.01     | -0.68 | 0.05 | nuclear receptor coactivator 7                                     | protein coding |
| ENSG00000133265 | HSPBP1   | 19 | 0.62 | 0.03     | -0.16 | 0.62     | -0.14 | NA   | HSPA (Hsp70) binding protein 1                                     | protein coding |
| ENSG00000122884 | P4HA1    | 10 | 0.62 | 0.03     | -0.32 | 0.24     | -0.39 | 0.23 | prolyl 4-hydroxylase subunit alpha 1                               | protein coding |
| ENSG00000160563 | MED27    | 9  | 0.62 | 0.01     | -0.13 | 0.59     | -0.14 | NA   | mediator complex subunit 27                                        | protein coding |
| ENSG00000104812 | GYS1     | 19 | 0.62 | 0.02     | -1.10 | 3.14E-07 | -0.45 | 0.14 | glycogen synthase 1                                                | protein coding |
| ENSG00000111669 | TPI1     | 12 | 0.62 | 0.03     | -0.60 | 0.01     | -0.14 | 0.65 | triosephosphate isomerase 1                                        | protein coding |
| ENSG00000002919 | SNX11    | 17 | 0.62 | 0.03     | -0.12 | 0.72     | -0.31 | NA   | sorting nexin 11                                                   | protein coding |
| ENSG00000163659 | TIPARP   | 3  | 0.62 | 0.02     | -0.64 | 3.42E-03 | -0.54 | 0.08 | TCDD inducible poly(ADP-ribose) polymerase                         | protein coding |
| ENSG00000170315 | UBB      | 17 | 0.62 | 0.03     | -0.26 | 0.36     | -0.08 | 0.82 | ubiquitin B                                                        | protein coding |

|                 |           |    |      |          |       |          |       |      |                                                                                 |                |
|-----------------|-----------|----|------|----------|-------|----------|-------|------|---------------------------------------------------------------------------------|----------------|
| ENSG00000103274 | NUBP1     | 16 | 0.61 | 7.70E-04 | -0.17 | 0.37     | -0.38 | 0.09 | nucleotide binding protein 1                                                    | protein coding |
| ENSG00000165732 | DDX21     | 10 | 0.61 | 0.04     | -0.24 | 0.43     | -0.51 | 0.14 | DExD-box helicase 21                                                            | protein coding |
| ENSG00000159335 | PTMS      | 12 | 0.61 | 0.03     | -0.99 | 7.57E-06 | -0.36 | 0.24 | parathyrosin                                                                    | protein coding |
| ENSG00000140157 | NIPA2     | 15 | 0.61 | 0.03     | -0.14 | 0.65     | -0.23 | 0.47 | non imprinted in Prader-Willi/Angelman syndrome 2                               | protein coding |
| ENSG00000204574 | ABCF1     | 6  | 0.61 | 2.04E-03 | -0.20 | 0.33     | -0.32 | 0.17 | ATP binding cassette subfamily F member 1                                       | protein coding |
| ENSG00000143575 | HAX1      | 1  | 0.61 | 0.05     | -0.10 | 0.78     | -0.15 | 0.67 | HCLS1 associated protein X-1                                                    | protein coding |
| ENSG00000149136 | SSRP1     | 11 | 0.61 | 0.01     | -0.20 | 0.38     | -0.37 | 0.15 | structure specific recognition protein 1                                        | protein coding |
| ENSG00000171135 | JAGN1     | 3  | 0.61 | 0.01     | -0.10 | 0.70     | -0.08 | 0.78 | jagunal homolog 1                                                               | protein coding |
| ENSG00000165916 | PSMC3     | 11 | 0.60 | 0.01     | -0.41 | 0.03     | -0.26 | 0.29 | proteasome 26S subunit, ATPase 3                                                | protein coding |
| ENSG00000183726 | TMEM50A   | 1  | 0.60 | 0.03     | 0.08  | 0.80     | -0.19 | 0.52 | transmembrane protein 50A                                                       | protein coding |
| ENSG00000157191 | NECAP2    | 1  | 0.60 | 1.44E-03 | -0.26 | 0.15     | -0.12 | 0.60 | NECAP endocytosis associated 2                                                  | protein coding |
| ENSG00000100401 | RANGAP1   | 22 | 0.60 | 0.03     | -0.27 | 0.31     | -0.40 | 0.18 | Ran GTPase activating protein 1                                                 | protein coding |
| ENSG00000272886 | DCP1A     | 3  | 0.60 | 0.05     | -0.13 | 0.70     | -0.43 | 0.21 | decapping mRNA 1A                                                               | protein coding |
| ENSG00000117450 | PRDX1     | 1  | 0.60 | 0.04     | -0.49 | 0.05     | -0.19 | 0.55 | peroxiredoxin 1                                                                 | protein coding |
| ENSG00000163754 | GYG1      | 3  | 0.60 | 0.04     | -0.38 | 0.15     | -0.21 | 0.50 | glycogenin 1                                                                    | protein coding |
| ENSG00000115165 | CYTIP     | 2  | 0.60 | 0.04     | -0.36 | 0.19     | -0.39 | 0.24 | cytohesin 1 interacting protein                                                 | protein coding |
| ENSG00000163154 | TNFAIP8L2 | 1  | 0.60 | 0.02     | -0.68 | 9.11E-04 | -0.05 | NA   | TNF alpha induced protein 8 like 2                                              | protein coding |
| ENSG00000197629 | MPEG1     | 11 | 0.60 | 4.51E-03 | -1.50 | 3.82E-20 | -0.34 | 0.17 | macrophage expressed 1                                                          | protein coding |
| ENSG00000125037 | EMC3      | 3  | 0.60 | 0.03     | 0.17  | 0.57     | -0.17 | 0.59 | ER membrane protein complex subunit 3                                           | protein coding |
| ENSG00000213523 | SRA1      | 5  | 0.60 | 0.01     | -0.11 | 0.67     | -0.10 | NA   | steroid receptor RNA activator 1                                                | protein coding |
| ENSG00000134001 | EIF2S1    | 14 | 0.60 | 0.03     | 0.01  | 0.97     | -0.43 | 0.16 | eukaryotic translation initiation factor 2 subunit alpha                        | protein coding |
| ENSG00000125835 | SNRPB     | 20 | 0.59 | 0.03     | 0.16  | 0.56     | -0.03 | 0.92 | small nuclear ribonucleoprotein polypeptides B and B1                           | protein coding |
| ENSG00000159377 | PSMB4     | 1  | 0.59 | 0.02     | -0.04 | 0.89     | -0.09 | 0.76 | proteasome subunit beta 4                                                       | protein coding |
| ENSG00000142227 | EMP3      | 19 | 0.59 | 0.05     | -0.84 | 5.34E-04 | -0.19 | 0.58 | epithelial membrane protein 3                                                   | protein coding |
| ENSG00000111224 | PARP11    | 12 | 0.59 | 0.04     | -0.72 | 2.38E-03 | -0.36 | 0.25 | poly(ADP-ribose) polymerase family member 11                                    | protein coding |
| ENSG00000105447 | GRWD1     | 19 | 0.59 | 0.01     | -0.03 | 0.93     | -0.16 | 0.57 | glutamate rich WD repeat containing 1                                           | protein coding |
| ENSG00000055070 | SZRD1     | 1  | 0.59 | 0.03     | -0.03 | 0.93     | -0.29 | 0.34 | SUZ RNA binding domain containing 1                                             | protein coding |
| ENSG00000163131 | CTSS      | 1  | 0.59 | 0.02     | -0.77 | 1.37E-04 | -0.21 | 0.43 | cathepsin S                                                                     | protein coding |
| ENSG00000076604 | TRAF4     | 17 | 0.59 | 0.02     | -0.13 | 0.66     | -0.52 | 0.08 | TNF receptor associated factor 4                                                | protein coding |
| ENSG00000153391 | INO80C    | 18 | 0.59 | 0.04     | -0.38 | 0.13     | -0.20 | NA   | INO80 complex subunit C                                                         | protein coding |
| ENSG00000074266 | EED       | 11 | 0.59 | 0.04     | -1.33 | 1.97E-09 | -0.49 | NA   | embryonic ectoderm development                                                  | protein coding |
| ENSG00000162139 | NEU3      | 11 | 0.58 | 0.04     | -0.43 | 0.09     | -0.63 | NA   | neuraminidase 3                                                                 | protein coding |
| ENSG00000131475 | VPS25     | 17 | 0.58 | 0.01     | -0.13 | 0.61     | -0.11 | NA   | vacuolar protein sorting 25 homolog                                             | protein coding |
| ENSG00000164442 | CITED2    | 6  | 0.58 | 0.04     | -0.48 | 0.05     | -0.31 | 0.31 | Cbp/p300 interacting transactivator with Glu/Asp rich carboxy-terminal domain 2 | protein coding |
| ENSG00000174021 | GNG5      | 1  | 0.58 | 0.05     | -0.24 | 0.41     | -0.34 | 0.29 | G protein subunit gamma 5                                                       | protein coding |
| ENSG00000158042 | MRPL17    | 11 | 0.58 | 0.03     | 0.12  | 0.67     | -0.09 | 0.78 | mitochondrial ribosomal protein L17                                             | protein coding |
| ENSG00000147684 | NDUFB9    | 8  | 0.58 | 0.03     | 0.05  | 0.89     | 0.00  | NA   | NADH:ubiquinone oxidoreductase subunit B9                                       | protein coding |
| ENSG00000134250 | NOTCH2    | 1  | 0.58 | 0.01     | -0.60 | 2.75E-03 | -0.28 | 0.29 | notch 2                                                                         | protein coding |
| ENSG00000232119 | MCTS1     | X  | 0.58 | 0.04     | -0.41 | 0.09     | -0.02 | NA   | MCTS1, re-initiation and release factor                                         | protein coding |
| ENSG00000107263 | RAPGEF1   | 9  | 0.58 | 0.03     | -0.77 | 3.47E-04 | -0.49 | 0.11 | Rap guanine nucleotide exchange factor 1                                        | protein coding |

|                 |          |    |      |          |       |          |       |      |                                                             |                |
|-----------------|----------|----|------|----------|-------|----------|-------|------|-------------------------------------------------------------|----------------|
| ENSG00000154582 | ELOC     | 8  | 0.58 | 0.03     | -0.17 | 0.55     | -0.52 | NA   | elongin C                                                   | protein coding |
| ENSG00000143553 | SNAPIN   | 1  | 0.58 | 0.05     | -0.01 | 0.97     | -0.26 | NA   | SNAP associated protein                                     | protein coding |
| ENSG00000168701 | TMEM208  | 16 | 0.57 | 0.04     | 0.20  | 0.48     | -0.08 | NA   | transmembrane protein 208                                   | protein coding |
| ENSG00000155115 | GTF3C6   | 6  | 0.57 | 0.02     | -0.11 | 0.68     | -0.03 | NA   | general transcription factor IIIC subunit 6                 | protein coding |
| ENSG00000138758 | 11-sep   | 4  | 0.57 | 0.02     | -0.22 | 0.35     | -0.24 | 0.36 | septin 11                                                   | protein coding |
| ENSG00000084623 | EIF3I    | 1  | 0.57 | 0.03     | 0.00  | 0.99     | -0.03 | 0.92 | eukaryotic translation initiation factor 3 subunit I        | protein coding |
| ENSG00000047249 | ATP6V1H  | 8  | 0.57 | 0.02     | -0.21 | 0.37     | -0.26 | 0.33 | ATPase H+ transporting V1 subunit H                         | protein coding |
| ENSG00000169567 | HINT1    | 5  | 0.57 | 0.03     | 0.06  | 0.84     | -0.03 | 0.93 | histidine triad nucleotide binding protein 1                | protein coding |
| ENSG00000134352 | IL6ST    | 5  | 0.57 | 0.05     | 0.02  | 0.96     | -0.32 | 0.30 | interleukin 6 signal transducer                             | protein coding |
| ENSG00000231389 | HLA-DPA1 | 6  | 0.56 | 0.02     | -0.43 | 0.04     | -0.12 | 0.66 | major histocompatibility complex, class II, DP alpha 1      | protein coding |
| ENSG00000014138 | POLA2    | 11 | 0.56 | 0.03     | -1.31 | 1.65E-11 | -0.51 | NA   | DNA polymerase alpha 2, accessory subunit                   | protein coding |
| ENSG00000095380 | NANS     | 9  | 0.56 | 0.05     | -0.67 | 4.32E-03 | -0.30 | 0.33 | N-acetylneuraminase synthase                                | protein coding |
| ENSG00000143155 | TIPRL    | 1  | 0.56 | 0.03     | -0.07 | 0.82     | -0.15 | NA   | TOR signaling pathway regulator                             | protein coding |
| ENSG00000065518 | NDUFB4   | 3  | 0.56 | 0.03     | -0.13 | 0.62     | -0.25 | 0.36 | NADH:ubiquinone oxidoreductase subunit B4                   | protein coding |
| ENSG00000156860 | FBRS     | 16 | 0.56 | 3.34E-03 | -0.49 | 3.36E-03 | -0.46 | 0.05 | fibrosin                                                    | protein coding |
| ENSG00000137806 | NDUFAB1  | 15 | 0.56 | 0.04     | -0.63 | 3.78E-03 | -0.38 | NA   | NADH:ubiquinone oxidoreductase complex assembly factor 1    | protein coding |
| ENSG00000115233 | PSMD14   | 2  | 0.56 | 0.02     | -0.01 | 0.96     | -0.17 | 0.50 | proteasome 26S subunit, non-ATPase 14                       | protein coding |
| ENSG00000196924 | FLNA     | X  | 0.56 | 0.02     | -0.10 | 0.71     | -0.22 | 0.39 | filamin A                                                   | protein coding |
| ENSG00000137106 | GRHPR    | 9  | 0.56 | 0.01     | -0.29 | 0.17     | -0.19 | 0.46 | glyoxylate and hydroxypyruvate reductase                    | protein coding |
| ENSG00000123131 | PRDX4    | X  | 0.55 | 0.04     | -0.24 | 0.36     | -0.09 | NA   | peroxiredoxin 4                                             | protein coding |
| ENSG00000168439 | STIP1    | 11 | 0.55 | 0.04     | -0.23 | 0.38     | -0.35 | 0.24 | stress induced phosphoprotein 1                             | protein coding |
| ENSG00000114480 | GBE1     | 3  | 0.55 | 0.03     | -0.47 | 0.03     | -0.26 | 0.34 | 1,4-alpha-glucan branching enzyme 1                         | protein coding |
| ENSG00000115091 | ACTR3    | 2  | 0.55 | 0.05     | -0.36 | 0.15     | -0.24 | 0.41 | ARP3 actin related protein 3 homolog                        | protein coding |
| ENSG00000173786 | CNP      | 17 | 0.55 | 0.03     | -0.20 | 0.43     | -0.38 | 0.17 | 2',3'-cyclic nucleotide 3' phosphodiesterase                | protein coding |
| ENSG00000019582 | CD74     | 5  | 0.55 | 0.01     | -0.13 | 0.61     | -0.11 | 0.68 | CD74 molecule                                               | protein coding |
| ENSG00000144746 | ARL6IP5  | 3  | 0.55 | 0.03     | -0.05 | 0.88     | -0.06 | 0.83 | ADP ribosylation factor like GTPase 6 interacting protein 5 | protein coding |
| ENSG00000132591 | ERAL1    | 17 | 0.55 | 0.02     | 0.19  | 0.42     | -0.06 | NA   | Era like 12S mitochondrial rRNA chaperone 1                 | protein coding |
| ENSG00000113811 | SELENOK  | 3  | 0.55 | 0.03     | -0.02 | 0.94     | -0.26 | NA   | selenoprotein K                                             | protein coding |
| ENSG00000127191 | TRAF2    | 9  | 0.55 | 0.01     | -0.40 | 0.04     | -0.26 | 0.29 | TNF receptor associated factor 2                            | protein coding |
| ENSG00000079931 | MOXD1    | 6  | 0.54 | 0.03     | -1.42 | 6.71E-14 | -0.23 | 0.40 | monooxygenase DBH like 1                                    | protein coding |
| ENSG00000114354 | TFG      | 3  | 0.54 | 0.05     | -0.28 | 0.26     | -0.34 | 0.25 | TRK-fused gene                                              | protein coding |
| ENSG00000265241 | RBM8A    | 1  | 0.54 | 0.02     | 0.03  | 0.93     | -0.24 | 0.32 | RNA binding motif protein 8A                                | protein coding |
| ENSG00000113558 | SKP1     | 5  | 0.54 | 0.03     | 0.08  | 0.78     | -0.03 | 0.92 | S-phase kinase associated protein 1                         | protein coding |
| ENSG00000165283 | STOML2   | 9  | 0.54 | 0.02     | 0.18  | 0.45     | -0.05 | 0.87 | stomatin like 2                                             | protein coding |
| ENSG00000104549 | SQLE     | 8  | 0.54 | 0.02     | -0.43 | 0.03     | -0.24 | NA   | squalene epoxidase                                          | protein coding |
| ENSG00000184162 | NR2C2AP  | 19 | 0.54 | 0.02     | -0.16 | 0.50     | -0.05 | NA   | nuclear receptor 2C2 associated protein                     | protein coding |
| ENSG00000074800 | ENO1     | 1  | 0.53 | 0.04     | -0.05 | 0.89     | -0.04 | 0.90 | enolase 1                                                   | protein coding |
| ENSG00000154719 | MRPL39   | 21 | 0.53 | 0.02     | -0.08 | 0.76     | -0.13 | NA   | mitochondrial ribosomal protein L39                         | protein coding |
| ENSG00000084733 | RAB10    | 2  | 0.53 | 0.03     | 0.01  | 0.97     | -0.19 | 0.50 | RAB10, member RAS oncogene family                           | protein coding |
| ENSG00000101367 | MAPRE1   | 20 | 0.53 | 0.02     | -0.15 | 0.53     | -0.10 | 0.71 | microtubule associated protein RP/EB family member 1        | protein coding |

|                 |         |    |      |          |       |          |       |      |                                                                     |                |
|-----------------|---------|----|------|----------|-------|----------|-------|------|---------------------------------------------------------------------|----------------|
| ENSG00000184209 | SNRNP35 | 12 | 0.53 | 0.04     | -0.30 | 0.20     | -0.30 | NA   | small nuclear ribonucleoprotein U11/U12 subunit 35                  | protein coding |
| ENSG00000074416 | MGLL    | 3  | 0.53 | 0.04     | -1.47 | 3.43E-14 | -0.37 | 0.19 | monoglyceride lipase                                                | protein coding |
| ENSG00000060642 | PIGV    | 1  | 0.53 | 0.04     | -0.66 | 1.57E-03 | -0.23 | NA   | phosphatidylinositol glycan anchor biosynthesis class V             | protein coding |
| ENSG00000102309 | PIN4    | X  | 0.53 | 0.02     | -0.75 | 2.37E-05 | -0.14 | NA   | peptidylprolyl cis/trans isomerase, NIMA-interacting 4              | protein coding |
| ENSG00000117448 | AKR1A1  | 1  | 0.53 | 0.01     | 0.30  | 0.13     | -0.05 | 0.86 | aldo-keto reductase family 1 member A1                              | protein coding |
| ENSG00000198742 | SMURF1  | 7  | 0.53 | 0.03     | -0.40 | 0.07     | -0.65 | 0.02 | SMAD specific E3 ubiquitin protein ligase 1                         | protein coding |
| ENSG00000079246 | XRCC5   | 2  | 0.53 | 0.04     | -0.07 | 0.81     | -0.12 | 0.70 | X-ray repair cross complementing 5                                  | protein coding |
| ENSG00000164053 | ATRIP   | 3  | 0.53 | 0.02     | -0.28 | 0.16     | -0.47 | NA   | ATR interacting protein                                             | protein coding |
| ENSG00000150753 | CCT5    | 5  | 0.52 | 0.01     | -0.21 | 0.29     | -0.24 | 0.29 | chaperonin containing TCP1 subunit 5                                | protein coding |
| ENSG00000155368 | DBI     | 2  | 0.52 | 0.03     | -0.43 | 0.04     | -0.20 | 0.42 | diazepam binding inhibitor, acyl-CoA binding protein                | protein coding |
| ENSG00000133935 | C14orf1 | 14 | 0.52 | 0.02     | 0.05  | 0.86     | -0.11 | NA   | chromosome 14 open reading frame 1                                  | protein coding |
| ENSG00000134287 | ARF3    | 12 | 0.52 | 0.02     | -0.20 | 0.36     | 0.02  | 0.95 | ADP ribosylation factor 3                                           | protein coding |
| ENSG00000141543 | EIF4A3  | 17 | 0.52 | 0.05     | -0.11 | 0.71     | -0.31 | 0.27 | eukaryotic translation initiation factor 4A3                        | protein coding |
| ENSG00000092330 | TINF2   | 14 | 0.52 | 0.04     | 0.12  | 0.67     | -0.22 | 0.42 | TERF1 interacting nuclear factor 2                                  | protein coding |
| ENSG00000165502 | RPL36AL | 14 | 0.52 | 0.04     | -0.11 | 0.70     | -0.18 | 0.52 | ribosomal protein L36a like                                         | protein coding |
| ENSG00000068323 | TFE3    | X  | 0.51 | 0.01     | -0.39 | 0.04     | -0.54 | 0.03 | transcription factor binding to IGHM enhancer 3                     | protein coding |
| ENSG00000170860 | LSM3    | 3  | 0.51 | 0.04     | -0.01 | 0.98     | -0.19 | NA   | LSM3 homolog, U6 small nuclear RNA and mRNA degradation associated  | protein coding |
| ENSG00000087077 | TRIP6   | 7  | 0.51 | 0.03     | -0.25 | 0.25     | -0.27 | 0.28 | thyroid hormone receptor interactor 6                               | protein coding |
| ENSG00000013275 | PSMC4   | 19 | 0.51 | 0.01     | -0.12 | 0.60     | -0.16 | 0.50 | proteasome 26S subunit, ATPase 4                                    | protein coding |
| ENSG00000234127 | TRIM26  | 6  | 0.51 | 0.04     | -0.59 | 3.33E-03 | -0.28 | NA   | tripartite motif containing 26                                      | protein coding |
| ENSG00000117758 | STX12   | 1  | 0.51 | 0.02     | -0.41 | 0.04     | -0.13 | 0.60 | syntaxin 12                                                         | protein coding |
| ENSG00000123444 | KBTBD4  | 11 | 0.51 | 0.03     | -0.19 | 0.40     | -0.10 | NA   | kelch repeat and BTB domain containing 4                            | protein coding |
| ENSG00000149428 | HYOU1   | 11 | 0.51 | 0.01     | 0.11  | 0.62     | -0.26 | 0.25 | hypoxia up-regulated 1                                              | protein coding |
| ENSG00000104320 | NBN     | 8  | 0.51 | 0.04     | -0.40 | 0.07     | -0.40 | 0.15 | nibrin                                                              | protein coding |
| ENSG00000273749 | CYFIP1  | 15 | 0.51 | 2.23E-03 | -0.64 | 3.91E-06 | -0.26 | 0.18 | cytoplasmic FMR1 interacting protein 1                              | protein coding |
| ENSG00000163159 | VPS72   | 1  | 0.51 | 0.03     | 0.03  | 0.93     | -0.27 | NA   | vacuolar protein sorting 72 homolog                                 | protein coding |
| ENSG00000023902 | PLEKHO1 | 1  | 0.51 | 0.01     | -0.48 | 2.51E-03 | -0.48 | 0.03 | pleckstrin homology domain containing O1                            | protein coding |
| ENSG00000132792 | CTNBL1  | 20 | 0.51 | 0.03     | -0.11 | 0.65     | -0.14 | 0.58 | catenin beta like 1                                                 | protein coding |
| ENSG00000186818 | LILRB4  | 19 | 0.50 | 0.04     | -1.09 | 1.86E-08 | -0.36 | 0.20 | leukocyte immunoglobulin like receptor B4                           | protein coding |
| ENSG00000084234 | APLP2   | 11 | 0.50 | 3.41E-03 | 0.25  | 0.12     | -0.19 | 0.32 | amyloid beta precursor like protein 2                               | protein coding |
| ENSG00000116288 | PARK7   | 1  | 0.50 | 0.05     | -0.06 | 0.85     | 0.04  | 0.89 | Parkinsonism associated deglycase                                   | protein coding |
| ENSG00000214717 | ZBED1   | X  | 0.50 | 5.80E-04 | -0.23 | 0.10     | -0.23 | 0.19 | zinc finger BED-type containing 1                                   | protein coding |
| ENSG00000101310 | SEC23B  | 20 | 0.50 | 0.03     | -0.20 | 0.39     | -0.22 | 0.39 | Sec23 homolog B, coat complex II component                          | protein coding |
| ENSG00000198522 | GPN1    | 2  | 0.50 | 0.04     | -0.10 | 0.71     | 0.10  | NA   | GPN-loop GTPase 1                                                   | protein coding |
| ENSG00000136141 | LRCH1   | 13 | 0.50 | 0.03     | -0.45 | 0.02     | -0.30 | NA   | leucine rich repeats and calponin homology domain containing 1      | protein coding |
| ENSG00000163399 | ATP1A1  | 1  | 0.50 | 0.02     | 0.04  | 0.87     | -0.04 | 0.86 | ATPase Na <sup>+</sup> /K <sup>+</sup> transporting subunit alpha 1 | protein coding |
| ENSG00000163468 | CCT3    | 1  | 0.50 | 0.02     | -0.04 | 0.88     | -0.08 | 0.73 | chaperonin containing TCP1 subunit 3                                | protein coding |
| ENSG00000136930 | PSMB7   | 9  | 0.49 | 0.03     | -0.11 | 0.66     | -0.04 | 0.88 | proteasome subunit beta 7                                           | protein coding |
| ENSG00000131507 | NDFIP1  | 5  | 0.49 | 0.04     | 0.00  | 0.99     | -0.04 | 0.88 | Nedd4 family interacting protein 1                                  | protein coding |
| ENSG00000078808 | SDF4    | 1  | 0.49 | 1.65E-03 | 0.17  | 0.28     | -0.12 | 0.52 | stromal cell derived factor 4                                       | protein coding |

|                 |             |    |      |          |       |          |       |      |                                                                      |                |
|-----------------|-------------|----|------|----------|-------|----------|-------|------|----------------------------------------------------------------------|----------------|
| ENSG00000159352 | PSMD4       | 1  | 0.49 | 0.01     | -0.35 | 0.03     | -0.05 | 0.82 | proteasome 26S subunit, non-ATPase 4                                 | protein coding |
| ENSG00000163719 | MTMR14      | 3  | 0.49 | 0.02     | -0.61 | 3.03E-04 | -0.27 | 0.24 | myotubularin related protein 14                                      | protein coding |
| ENSG00000169976 | SF3B5       | 6  | 0.49 | 0.03     | -0.06 | 0.82     | -0.03 | 0.92 | splicing factor 3b subunit 5                                         | protein coding |
| ENSG00000092010 | PSME1       | 14 | 0.49 | 0.05     | -0.38 | 0.08     | -0.10 | 0.72 | proteasome activator subunit 1                                       | protein coding |
| ENSG00000111859 | NEDD9       | 6  | 0.49 | 0.02     | -0.63 | 1.53E-04 | -0.33 | 0.15 | neural precursor cell expressed, developmentally down-regulated 9    | protein coding |
| ENSG00000109790 | KLHL5       | 4  | 0.48 | 0.04     | -0.30 | 0.15     | -0.35 | NA   | kelch like family member 5                                           | protein coding |
| ENSG00000103932 | RPAP1       | 15 | 0.48 | 0.04     | 0.03  | 0.91     | -0.19 | NA   | RNA polymerase II associated protein 1                               | protein coding |
| ENSG00000178719 | GRINA       | 8  | 0.48 | 4.36E-03 | -0.29 | 0.07     | -0.04 | 0.85 | glutamate ionotropic receptor NMDA type subunit associated protein 1 | protein coding |
| ENSG00000205352 | PRR13       | 12 | 0.48 | 0.01     | -0.23 | 0.17     | -0.12 | 0.54 | proline rich 13                                                      | protein coding |
| ENSG00000173418 | NAA20       | 20 | 0.48 | 0.04     | -0.11 | 0.65     | -0.08 | NA   | N(alpha)-acetyltransferase 20, NatB catalytic subunit                | protein coding |
| ENSG00000181924 | COA4        | 11 | 0.48 | 0.03     | 0.13  | 0.56     | -0.14 | NA   | cytochrome c oxidase assembly factor 4 homolog                       | protein coding |
| ENSG0000010270  | STARD3NL    | 7  | 0.48 | 0.04     | 0.18  | 0.44     | -0.18 | 0.47 | STARD3 N-terminal like                                               | protein coding |
| ENSG00000101363 | MANBAL      | 20 | 0.48 | 0.04     | -0.16 | 0.50     | -0.35 | NA   | mannosidase beta like                                                | protein coding |
| ENSG00000163964 | PIGX        | 3  | 0.47 | 0.02     | -0.13 | 0.52     | -0.20 | 0.36 | phosphatidylinositol glycan anchor biosynthesis class X              | protein coding |
| ENSG00000141741 | MIEN1       | 17 | 0.47 | 0.02     | -0.21 | 0.27     | -0.21 | NA   | migration and invasion enhancer 1                                    | protein coding |
| ENSG00000180353 | HCLS1       | 3  | 0.47 | 0.01     | -0.83 | 2.11E-09 | -0.11 | 0.59 | hematopoietic cell-specific Lyn substrate 1                          | protein coding |
| ENSG00000265148 | TSPOAP1-AS1 | 17 | 0.47 | 0.03     | -0.84 | 7.16E-07 | -0.34 | NA   | TSPOAP1 antisense RNA 1                                              | antisense      |
| ENSG00000165168 | CYBB        | X  | 0.47 | 0.05     | -0.40 | 0.05     | -0.07 | 0.82 | cytochrome b-245 beta chain                                          | protein coding |
| ENSG00000116863 | ADPRHL2     | 1  | 0.47 | 0.03     | -0.10 | 0.66     | -0.11 | NA   | ADP-ribosylhydrolase like 2                                          | protein coding |
| ENSG00000102172 | SMS         | X  | 0.46 | 0.04     | -0.51 | 0.01     | -0.16 | 0.52 | spermine synthase                                                    | protein coding |
| ENSG00000185753 | CXorf38     | X  | 0.46 | 0.04     | -0.08 | 0.75     | -0.41 | 0.11 | chromosome X open reading frame 38                                   | protein coding |
| ENSG00000128708 | HAT1        | 2  | 0.46 | 0.02     | -0.03 | 0.89     | -0.09 | NA   | histone acetyltransferase 1                                          | protein coding |
| ENSG00000131467 | PSME3       | 17 | 0.46 | 0.01     | 0.10  | 0.62     | -0.06 | 0.78 | proteasome activator subunit 3                                       | protein coding |
| ENSG00000033050 | ABCF2       | 7  | 0.45 | 0.01     | 0.22  | 0.20     | -0.08 | 0.69 | ATP binding cassette subfamily F member 2                            | protein coding |
| ENSG00000169180 | XPO6        | 16 | 0.45 | 0.02     | -0.44 | 0.01     | -0.18 | 0.39 | exportin 6                                                           | protein coding |
| ENSG00000169813 | HNRNPF      | 10 | 0.45 | 0.03     | -0.06 | 0.79     | -0.12 | 0.61 | heterogeneous nuclear ribonucleoprotein F                            | protein coding |
| ENSG00000097033 | SH3GLB1     | 1  | 0.45 | 0.04     | -0.01 | 0.97     | -0.19 | 0.42 | SH3 domain containing GRB2 like endophilin B1                        | protein coding |
| ENSG00000117395 | EBNA1BP2    | 1  | 0.45 | 0.03     | -0.06 | 0.80     | -0.05 | NA   | EBNA1 binding protein 2                                              | protein coding |
| ENSG00000196419 | XRCC6       | 22 | 0.45 | 0.04     | 0.14  | 0.54     | -0.04 | 0.89 | X-ray repair cross complementing 6                                   | protein coding |
| ENSG00000166925 | TSC22D4     | 7  | 0.45 | 0.02     | -0.30 | 0.08     | -0.22 | 0.30 | TSC22 domain family member 4                                         | protein coding |
| ENSG00000196352 | CD55        | 1  | 0.45 | 0.03     | -0.48 | 4.64E-03 | -0.16 | 0.47 | CD55 molecule (Cromer blood group)                                   | protein coding |
| ENSG00000046653 | GPM6B       | X  | 0.45 | 2.68E-03 | -0.76 | 1.99E-10 | -0.28 | NA   | glycoprotein M6B                                                     | protein coding |
| ENSG00000011132 | APBA3       | 19 | 0.44 | 0.02     | -0.03 | 0.91     | -0.28 | 0.19 | amyloid beta precursor protein binding family A member 3             | protein coding |
| ENSG00000132475 | H3F3B       | 17 | 0.44 | 0.05     | -0.04 | 0.88     | -0.24 | 0.33 | H3 histone family member 3B                                          | protein coding |
| ENSG00000100462 | PRMT5       | 14 | 0.44 | 0.02     | -0.04 | 0.87     | -0.12 | 0.57 | protein arginine methyltransferase 5                                 | protein coding |
| ENSG00000118260 | CREB1       | 2  | 0.44 | 0.01     | -0.19 | 0.24     | -0.14 | 0.45 | cAMP responsive element binding protein 1                            | protein coding |
| ENSG00000182220 | ATP6AP2     | X  | 0.44 | 0.03     | 0.30  | 0.10     | 0.05  | 0.83 | ATPase H+ transporting accessory protein 2                           | protein coding |
| ENSG00000115839 | RAB3GAP1    | 2  | 0.44 | 0.03     | -0.27 | 0.15     | -0.22 | 0.32 | RAB3 GTPase activating protein catalytic subunit 1                   | protein coding |
| ENSG00000197147 | LRRC8B      | 1  | 0.44 | 0.03     | -0.32 | 0.06     | -0.19 | NA   | leucine rich repeat containing 8 family member B                     | protein coding |
| ENSG00000102103 | PQBP1       | X  | 0.43 | 0.01     | -0.06 | 0.77     | -0.05 | 0.80 | polyglutamine binding protein 1                                      | protein coding |

|                 |         |    |      |          |       |          |       |      |                                                                  |                |
|-----------------|---------|----|------|----------|-------|----------|-------|------|------------------------------------------------------------------|----------------|
| ENSG00000135624 | CCT7    | 2  | 0.43 | 0.05     | -0.58 | 1.06E-03 | -0.03 | 0.90 | chaperonin containing TCP1 subunit 7                             | protein coding |
| ENSG00000124226 | RNF114  | 20 | 0.43 | 0.03     | -0.17 | 0.39     | -0.23 | 0.29 | ring finger protein 114                                          | protein coding |
| ENSG00000102144 | PGK1    | X  | 0.43 | 0.05     | -0.20 | 0.35     | 0.02  | 0.93 | phosphoglycerate kinase 1                                        | protein coding |
| ENSG00000100764 | PSMC1   | 14 | 0.43 | 0.03     | 0.13  | 0.53     | -0.22 | 0.29 | proteasome 26S subunit, ATPase 1                                 | protein coding |
| ENSG00000141959 | PFKL    | 21 | 0.43 | 0.02     | -0.27 | 0.10     | -0.16 | 0.42 | phosphofructokinase, liver type                                  | protein coding |
| ENSG00000100225 | FBXO7   | 22 | 0.43 | 0.05     | -0.05 | 0.84     | -0.13 | 0.60 | F-box protein 7                                                  | protein coding |
| ENSG00000129460 | NGDN    | 14 | 0.43 | 0.01     | 0.13  | 0.45     | -0.12 | NA   | neuroguidin                                                      | protein coding |
| ENSG00000148572 | NRBF2   | 10 | 0.43 | 0.03     | 0.04  | 0.86     | -0.10 | NA   | nuclear receptor binding factor 2                                | protein coding |
| ENSG00000143570 | SLC39A1 | 1  | 0.42 | 0.03     | 0.12  | 0.54     | -0.02 | 0.94 | solute carrier family 39 member 1                                | protein coding |
| ENSG00000143420 | ENSA    | 1  | 0.42 | 0.03     | -0.42 | 0.01     | -0.19 | 0.37 | endosulfine alpha                                                | protein coding |
| ENSG00000158796 | DEDD    | 1  | 0.42 | 3.11E-03 | -0.15 | 0.26     | -0.27 | 0.11 | death effector domain containing                                 | protein coding |
| ENSG00000165271 | NOL6    | 9  | 0.42 | 0.05     | 0.28  | 0.13     | -0.27 | 0.25 | nucleolar protein 6                                              | protein coding |
| ENSG00000121067 | SPOP    | 17 | 0.41 | 0.02     | -0.11 | 0.57     | -0.04 | 0.85 | speckle type BTB/POZ protein                                     | protein coding |
| ENSG00000092199 | HNRNPC  | 14 | 0.41 | 0.05     | -0.05 | 0.85     | -0.17 | 0.46 | heterogeneous nuclear ribonucleoprotein C (C1/C2)                | protein coding |
| ENSG00000275700 | AATF    | 17 | 0.41 | 0.05     | -0.31 | 0.09     | -0.04 | NA   | apoptosis antagonizing transcription factor                      | protein coding |
| ENSG00000174173 | TRMT10C | 3  | 0.41 | 0.03     | -0.17 | 0.37     | -0.21 | NA   | tRNA methyltransferase 10C, mitochondrial RNase P subunit        | protein coding |
| ENSG00000141965 | FEM1A   | 19 | 0.41 | 0.02     | 0.06  | 0.76     | -0.20 | 0.30 | fem-1 homolog A                                                  | protein coding |
| ENSG00000173692 | PSMD1   | 2  | 0.41 | 0.03     | 0.02  | 0.92     | -0.12 | 0.59 | proteasome 26S subunit, non-ATPase 1                             | protein coding |
| ENSG00000004455 | AK2     | 1  | 0.41 | 0.04     | 0.20  | 0.31     | 0.01  | 0.98 | adenylate kinase 2                                               | protein coding |
| ENSG00000198561 | CTNND1  | 11 | 0.40 | 0.02     | 0.29  | 0.07     | -0.20 | 0.30 | catenin delta 1                                                  | protein coding |
| ENSG00000126067 | PSMB2   | 1  | 0.40 | 0.03     | 0.04  | 0.84     | -0.10 | 0.64 | proteasome subunit beta 2                                        | protein coding |
| ENSG00000087191 | PSMC5   | 17 | 0.40 | 0.02     | -0.05 | 0.81     | -0.18 | 0.33 | proteasome 26S subunit, ATPase 5                                 | protein coding |
| ENSG00000150977 | RILPL2  | 12 | 0.39 | 0.03     | 0.12  | 0.54     | -0.27 | 0.19 | Rab interacting lysosomal protein like 2                         | protein coding |
| ENSG00000163832 | ELP6    | 3  | 0.39 | 0.03     | -0.35 | 0.03     | -0.04 | NA   | elongator acetyltransferase complex subunit 6                    | protein coding |
| ENSG00000141510 | TP53    | 17 | 0.39 | 0.05     | -0.02 | 0.95     | -0.01 | 0.98 | tumor protein p53                                                | protein coding |
| ENSG00000074319 | TSG101  | 11 | 0.39 | 0.02     | -0.33 | 0.02     | -0.19 | 0.30 | tumor susceptibility 101                                         | protein coding |
| ENSG00000125970 | RALY    | 20 | 0.39 | 9.80E-04 | -0.30 | 4.04E-03 | -0.09 | 0.52 | RALY heterogeneous nuclear ribonucleoprotein                     | protein coding |
| ENSG00000167986 | DDB1    | 11 | 0.39 | 0.05     | 0.21  | 0.27     | 0.01  | 0.97 | damage specific DNA binding protein 1                            | protein coding |
| ENSG00000090273 | NUDC    | 1  | 0.38 | 0.02     | 0.08  | 0.68     | -0.03 | 0.89 | nuclear distribution C, dynein complex regulator                 | protein coding |
| ENSG00000130402 | ACTN4   | 19 | 0.38 | 0.01     | -0.35 | 0.01     | -0.16 | 0.33 | actinin alpha 4                                                  | protein coding |
| ENSG00000183431 | SF3A3   | 1  | 0.38 | 0.04     | -0.16 | 0.36     | -0.13 | 0.50 | splicing factor 3a subunit 3                                     | protein coding |
| ENSG00000140740 | UQCRC2  | 16 | 0.37 | 0.04     | -0.30 | 0.06     | -0.05 | 0.81 | ubiquinol-cytochrome c reductase core protein II                 | protein coding |
| ENSG00000125734 | GPR108  | 19 | 0.37 | 0.03     | -0.21 | 0.20     | -0.12 | 0.54 | G protein-coupled receptor 108                                   | protein coding |
| ENSG00000119203 | CPSF3   | 2  | 0.37 | 0.04     | -0.08 | 0.69     | -0.15 | 0.42 | cleavage and polyadenylation specific factor 3                   | protein coding |
| ENSG00000149182 | ARFGAP2 | 11 | 0.37 | 0.04     | -0.01 | 0.96     | 0.05  | 0.83 | ADP ribosylation factor GTPase activating protein 2              | protein coding |
| ENSG00000115866 | DARS    | 2  | 0.37 | 0.05     | -0.27 | 0.10     | -0.07 | 0.74 | aspartyl-tRNA synthetase                                         | protein coding |
| ENSG00000107862 | GBF1    | 10 | 0.37 | 0.01     | 0.23  | 0.05     | -0.21 | 0.18 | golgi brefeldin A resistant guanine nucleotide exchange factor 1 | protein coding |
| ENSG00000204160 | ZDHC18  | 1  | 0.36 | 0.01     | -0.08 | 0.63     | -0.25 | 0.14 | zinc finger DHHC-type containing 18                              | protein coding |
| ENSG00000161847 | RAVER1  | 19 | 0.36 | 0.02     | 0.19  | 0.19     | -0.19 | 0.29 | ribonucleoprotein, PTB binding 1                                 | protein coding |
| ENSG00000151779 | NBAS    | 2  | 0.36 | 0.03     | -0.26 | 0.09     | -0.06 | 0.74 | neuroblastoma amplified sequence                                 | protein coding |
| ENSG00000164889 | SLC4A2  | 7  | 0.36 | 0.05     | 0.03  | 0.90     | -0.16 | 0.41 | solute carrier family 4 member 2                                 | protein coding |



|                 |          |    |       |      |       |          |       |      |                                                         |                |
|-----------------|----------|----|-------|------|-------|----------|-------|------|---------------------------------------------------------|----------------|
| ENSG00000167881 | SRP68    | 17 | 0.36  | 0.05 | 0.21  | 0.19     | -0.01 | 0.95 | signal recognition particle 68                          | protein coding |
| ENSG00000103496 | STX4     | 16 | 0.36  | 0.05 | -0.37 | 0.01     | -0.38 | 0.07 | syntaxin 4                                              | protein coding |
| ENSG00000119487 | MAPKAP1  | 9  | 0.36  | 0.01 | -0.07 | 0.68     | -0.14 | 0.38 | mitogen-activated protein kinase associated protein 1   | protein coding |
| ENSG00000147654 | EBAG9    | 8  | 0.35  | 0.05 | -0.42 | 3.28E-03 | -0.19 | NA   | estrogen receptor binding site associated, antigen, 9   | protein coding |
| ENSG00000173039 | RELA     | 11 | 0.34  | 0.02 | 0.09  | 0.59     | -0.18 | 0.28 | RELA proto-oncogene, NF-kB subunit                      | protein coding |
| ENSG00000126698 | DNAJC8   | 1  | 0.34  | 0.04 | -0.09 | 0.57     | -0.16 | 0.35 | DnaJ heat shock protein family (Hsp40) member C8        | protein coding |
| ENSG00000204463 | BAG6     | 6  | 0.33  | 0.04 | -0.08 | 0.64     | -0.02 | 0.94 | BCL2 associated athanogene 6                            | protein coding |
| ENSG00000164253 | WDR41    | 5  | 0.33  | 0.03 | -0.08 | 0.64     | -0.06 | 0.73 | WD repeat domain 41                                     | protein coding |
| ENSG00000140350 | ANP32A   | 15 | 0.33  | 0.04 | -0.03 | 0.87     | -0.09 | 0.61 | acidic nuclear phosphoprotein 32 family member A        | protein coding |
| ENSG00000162521 | RBBP4    | 1  | 0.33  | 0.04 | -0.21 | 0.13     | -0.09 | 0.60 | RB binding protein 4, chromatin remodeling factor       | protein coding |
| ENSG00000105401 | CDC37    | 19 | 0.33  | 0.03 | 0.04  | 0.81     | -0.20 | 0.23 | cell division cycle 37                                  | protein coding |
| ENSG00000110497 | AMBRA1   | 11 | 0.33  | 0.04 | 0.25  | 0.05     | -0.10 | 0.58 | autophagy and beclin 1 regulator 1                      | protein coding |
| ENSG00000189091 | SF3B3    | 16 | 0.32  | 0.04 | 0.24  | 0.09     | 0.01  | 0.95 | splicing factor 3b subunit 3                            | protein coding |
| ENSG00000126581 | BECN1    | 17 | 0.32  | 0.01 | 0.24  | 0.02     | -0.12 | 0.36 | beclin 1                                                | protein coding |
| ENSG00000108344 | PSMD3    | 17 | 0.32  | 0.03 | 0.11  | 0.48     | 0.03  | 0.87 | proteasome 26S subunit, non-ATPase 3                    | protein coding |
| ENSG00000132128 | LRRC41   | 1  | 0.32  | 0.05 | 0.01  | 0.95     | -0.11 | 0.51 | leucine rich repeat containing 41                       | protein coding |
| ENSG00000172943 | PHF8     | X  | 0.31  | 0.03 | -0.26 | 0.03     | -0.12 | 0.42 | PHD finger protein 8                                    | protein coding |
| ENSG00000144580 | CNOT9    | 2  | 0.31  | 0.02 | 0.05  | 0.76     | -0.07 | 0.64 | CCR4-NOT transcription complex subunit 9                | protein coding |
| ENSG00000116688 | MFN2     | 1  | 0.31  | 0.05 | -0.04 | 0.82     | -0.12 | 0.48 | mitofusin 2                                             | protein coding |
| ENSG00000101337 | TM9SF4   | 20 | 0.30  | 0.03 | 0.36  | 1.59E-03 | -0.08 | 0.64 | transmembrane 9 superfamily member 4                    | protein coding |
| ENSG00000179562 | GCC1     | 7  | 0.30  | 0.04 | 0.17  | 0.20     | -0.03 | 0.88 | GRIP and coiled-coil domain containing 1                | protein coding |
| ENSG00000105058 | FAM32A   | 19 | 0.29  | 0.05 | 0.24  | 0.06     | -0.10 | 0.52 | family with sequence similarity 32 member A             | protein coding |
| ENSG00000106244 | PDAP1    | 7  | 0.27  | 0.04 | 0.03  | 0.87     | -0.14 | 0.30 | PDGFA associated protein 1                              | protein coding |
| ENSG00000092201 | SUPT16H  | 14 | 0.25  | 0.05 | -0.12 | 0.33     | -0.09 | 0.54 | SPT16 homolog, facilitates chromatin remodeling subunit | protein coding |
| ENSG00000143157 | POGK     | 1  | -0.23 | 0.03 | 0.40  | 8.22E-07 | 0.22  | 0.07 | pogo transposable element with KRAB domain              | protein coding |
| ENSG00000101126 | ADNP     | 20 | -0.25 | 0.05 | 0.03  | 0.86     | 0.05  | 0.73 | activity dependent neuroprotector homeobox              | protein coding |
| ENSG00000225733 | FGD5-AS1 | 3  | -0.26 | 0.05 | 0.53  | 6.98E-08 | 0.11  | 0.41 | FGD5 antisense RNA 1                                    | antisense      |
| ENSG00000067955 | CBFB     | 16 | -0.32 | 0.04 | 0.35  | 0.01     | 0.31  | 0.08 | core-binding factor beta subunit                        | protein coding |
| ENSG00000197102 | DYNC1H1  | 14 | -0.34 | 0.04 | 0.34  | 0.01     | 0.10  | 0.56 | dynein cytoplasmic 1 heavy chain 1                      | protein coding |
| ENSG00000153250 | RBMS1    | 2  | -0.34 | 0.03 | 0.07  | 0.70     | 0.00  | 1.00 | RNA binding motif single stranded interacting protein 1 | protein coding |
| ENSG00000066422 | ZBTB11   | 3  | -0.36 | 0.04 | 0.56  | 4.69E-05 | 0.31  | 0.12 | zinc finger and BTB domain containing 11                | protein coding |
| ENSG00000187257 | RSBN1L   | 7  | -0.37 | 0.04 | 0.27  | 0.10     | 0.13  | 0.51 | round spermatid basic protein 1 like                    | protein coding |
| ENSG00000086102 | NFX1     | 9  | -0.38 | 0.01 | 0.05  | 0.78     | 0.08  | 0.68 | nuclear transcription factor, X-box binding 1           | protein coding |
| ENSG00000110851 | PRDM4    | 12 | -0.39 | 0.02 | 0.20  | 0.23     | 0.08  | NA   | PR/SET domain 4                                         | protein coding |
| ENSG00000188895 | MSL1     | 17 | -0.39 | 0.02 | 0.27  | 0.08     | 0.06  | 0.79 | male specific lethal 1 homolog                          | protein coding |
| ENSG00000163950 | SLBP     | 4  | -0.40 | 0.01 | 0.32  | 0.01     | 0.26  | 0.12 | stem-loop binding protein                               | protein coding |
| ENSG00000102606 | ARHGEF7  | 13 | -0.41 | 0.03 | 0.22  | 0.23     | 0.24  | 0.27 | Rho guanine nucleotide exchange factor 7                | protein coding |
| ENSG00000179456 | ZBTB18   | 1  | -0.42 | 0.01 | 0.03  | 0.90     | 0.10  | 0.59 | zinc finger and BTB domain containing 18                | protein coding |
| ENSG00000110066 | KMT5B    | 11 | -0.42 | 0.03 | 0.21  | 0.25     | 0.31  | 0.17 | lysine methyltransferase 5B                             | protein coding |
| ENSG0000017797  | RALBP1   | 18 | -0.42 | 0.04 | 0.76  | 2.01E-06 | 0.37  | 0.11 | ralA binding protein 1                                  | protein coding |
| ENSG00000138604 | GLCE     | 15 | -0.42 | 0.04 | 0.26  | 0.17     | 0.27  | NA   | glucuronic acid epimerase                               | protein coding |

|                 |          |    |       |          |       |          |      |      |                                                                  |                |
|-----------------|----------|----|-------|----------|-------|----------|------|------|------------------------------------------------------------------|----------------|
| ENSG00000163960 | UBXN7    | 3  | -0.42 | 0.01     | 0.49  | 2.41E-04 | 0.28 | 0.14 | UBX domain protein 7                                             | protein coding |
| ENSG00000215114 | UBXN2B   | 8  | -0.43 | 0.01     | 0.78  | 4.92E-09 | 0.29 | NA   | UBX domain protein 2B                                            | protein coding |
| ENSG00000140577 | CRTC3    | 15 | -0.44 | 0.03     | 0.41  | 0.02     | 0.39 | 0.10 | CREB regulated transcription coactivator 3                       | protein coding |
| ENSG00000165512 | ZNF22    | 10 | -0.45 | 0.03     | -0.04 | 0.87     | 0.19 | 0.39 | zinc finger protein 22                                           | protein coding |
| ENSG00000109787 | KLF3     | 4  | -0.45 | 0.05     | 0.41  | 0.03     | 0.35 | NA   | Kruppel like factor 3                                            | protein coding |
| ENSG00000169967 | MAP3K2   | 2  | -0.45 | 0.02     | 0.40  | 0.02     | 0.20 | 0.36 | mitogen-activated protein kinase kinase kinase 2                 | protein coding |
| ENSG00000083844 | ZNF264   | 19 | -0.46 | 0.02     | 0.65  | 2.87E-05 | 0.23 | NA   | zinc finger protein 264                                          | protein coding |
| ENSG00000152443 | ZNF776   | 19 | -0.46 | 0.04     | 0.53  | 4.77E-03 | 0.24 | NA   | zinc finger protein 776                                          | protein coding |
| ENSG00000107140 | TESK1    | 9  | -0.46 | 0.02     | 0.23  | 0.23     | 0.07 | 0.77 | testis-specific kinase 1                                         | protein coding |
| ENSG00000077684 | JADE1    | 4  | -0.46 | 0.03     | -0.15 | 0.49     | 0.34 | NA   | jade family PHD finger 1                                         | protein coding |
| ENSG00000141298 | SSH2     | 17 | -0.47 | 0.04     | 0.48  | 0.01     | 0.29 | 0.25 | slingshot protein phosphatase 2                                  | protein coding |
| ENSG00000143614 | GATAD2B  | 1  | -0.47 | 0.05     | 0.52  | 0.01     | 0.38 | NA   | GATA zinc finger domain containing 2B                            | protein coding |
| ENSG00000182606 | TRAK1    | 3  | -0.47 | 0.04     | 0.19  | 0.42     | 0.10 | 0.71 | trafficking kinesin protein 1                                    | protein coding |
| ENSG00000152520 | PAN3     | 13 | -0.48 | 0.04     | -0.26 | 0.24     | 0.17 | 0.50 | PAN3 poly(A) specific ribonuclease subunit                       | protein coding |
| ENSG00000130305 | NSUN5    | 7  | -0.48 | 0.02     | 0.68  | 4.17E-05 | 0.46 | NA   | NOP2/Sun RNA methyltransferase family member 5                   | protein coding |
| ENSG00000033867 | SLC4A7   | 3  | -0.48 | 0.04     | -0.19 | 0.42     | 0.43 | NA   | solute carrier family 4 member 7                                 | protein coding |
| ENSG00000095585 | BLNK     | 10 | -0.49 | 0.01     | 0.60  | 2.32E-04 | 0.31 | 0.17 | B-cell linker                                                    | protein coding |
| ENSG00000198363 | ASPH     | 8  | -0.49 | 0.04     | 0.33  | 0.12     | 0.22 | 0.39 | aspartate beta-hydroxylase                                       | protein coding |
| ENSG00000172845 | SP3      | 2  | -0.49 | 1.28E-03 | 0.34  | 0.01     | 0.27 | 0.14 | Sp3 transcription factor                                         | protein coding |
| ENSG00000266094 | RASSF5   | 1  | -0.50 | 0.03     | 0.36  | 0.08     | 0.41 | 0.12 | Ras association domain family member 5                           | protein coding |
| ENSG00000141582 | CBX4     | 17 | -0.50 | 0.05     | -0.08 | 0.78     | 0.29 | 0.29 | chromobox 4                                                      | protein coding |
| ENSG00000177888 | ZBTB41   | 1  | -0.51 | 0.04     | 0.65  | 1.25E-03 | 0.24 | NA   | zinc finger and BTB domain containing 41                         | protein coding |
| ENSG00000121741 | ZMYM2    | 13 | -0.51 | 0.02     | 0.22  | 0.28     | 0.05 | 0.86 | zinc finger MYM-type containing 2                                | protein coding |
| ENSG00000163428 | LRRC58   | 3  | -0.51 | 0.04     | 0.64  | 2.01E-03 | 0.43 | 0.14 | leucine rich repeat containing 58                                | protein coding |
| ENSG00000135974 | C2orf49  | 2  | -0.51 | 0.03     | 0.33  | 0.12     | 0.15 | NA   | chromosome 2 open reading frame 49                               | protein coding |
| ENSG00000170456 | DENND5B  | 12 | -0.51 | 0.04     | 0.35  | 0.11     | 0.24 | 0.37 | DENN domain containing 5B                                        | protein coding |
| ENSG00000141232 | TOB1     | 17 | -0.52 | 0.01     | 0.10  | 0.66     | 0.20 | NA   | transducer of ERBB2, 1                                           | protein coding |
| ENSG00000135966 | TGFBRAP1 | 2  | -0.52 | 0.05     | 0.55  | 0.01     | 0.37 | 0.20 | transforming growth factor beta receptor associated protein 1    | protein coding |
| ENSG00000158158 | CNNM4    | 2  | -0.52 | 0.02     | 0.47  | 0.01     | 0.34 | NA   | cyclin and CBS domain divalent metal cation transport mediator 4 | protein coding |
| ENSG00000166529 | ZSCAN21  | 7  | -0.52 | 0.04     | 0.72  | 4.84E-04 | 0.32 | NA   | zinc finger and SCAN domain containing 21                        | protein coding |
| ENSG00000198894 | CIPC     | 14 | -0.52 | 0.05     | 0.84  | 5.13E-05 | 0.22 | NA   | CLOCK interacting pacemaker                                      | protein coding |
| ENSG00000163602 | RYBP     | 3  | -0.52 | 0.01     | 0.72  | 6.86E-06 | 0.50 | 0.03 | RING1 and YY1 binding protein                                    | protein coding |
| ENSG00000151498 | ACAD8    | 11 | -0.53 | 0.03     | 0.11  | 0.70     | 0.18 | NA   | acyl-CoA dehydrogenase family member 8                           | protein coding |
| ENSG00000081177 | EXD2     | 14 | -0.53 | 0.04     | 0.09  | 0.75     | 0.74 | NA   | exonuclease 3'-5' domain containing 2                            | protein coding |
| ENSG00000108055 | SMC3     | 10 | -0.53 | 0.03     | 0.49  | 0.02     | 0.24 | 0.36 | structural maintenance of chromosomes 3                          | protein coding |
| ENSG00000136108 | CKAP2    | 13 | -0.54 | 0.04     | 1.00  | 1.23E-06 | 0.51 | 0.09 | cytoskeleton associated protein 2                                | protein coding |
| ENSG00000197930 | ERO1A    | 14 | -0.54 | 0.03     | 0.34  | 0.12     | 0.28 | 0.29 | endoplasmic reticulum oxidoreductase 1 alpha                     | protein coding |
| ENSG00000213390 | ARHGAP19 | 10 | -0.54 | 0.03     | 0.04  | 0.91     | 0.45 | NA   | Rho GTPase activating protein 19                                 | protein coding |
| ENSG00000153487 | ING1     | 13 | -0.54 | 0.03     | 0.29  | 0.23     | 0.27 | NA   | inhibitor of growth family member 1                              | protein coding |
| ENSG00000112406 | HECA     | 6  | -0.55 | 0.03     | 0.46  | 0.03     | 0.27 | 0.31 | hdc homolog, cell cycle regulator                                | protein coding |

|                 |         |    |       |          |       |          |       |      |                                                              |                |
|-----------------|---------|----|-------|----------|-------|----------|-------|------|--------------------------------------------------------------|----------------|
| ENSG0000099940  | SNAP29  | 22 | -0.55 | 0.03     | 0.96  | 2.09E-06 | 0.49  | 0.10 | synaptosome associated protein 29                            | protein coding |
| ENSG00000198586 | TLK1    | 2  | -0.55 | 0.02     | -0.19 | 0.43     | 0.09  | 0.75 | tousled like kinase 1                                        | protein coding |
| ENSG00000173011 | TADA2B  | 4  | -0.55 | 0.03     | 1.01  | 1.47E-07 | 0.43  | 0.12 | transcriptional adaptor 2B                                   | protein coding |
| ENSG00000134262 | AP4B1   | 1  | -0.55 | 0.02     | 0.14  | 0.57     | 0.45  | NA   | adaptor related protein complex 4 beta 1 subunit             | protein coding |
| ENSG00000145029 | NICN1   | 3  | -0.55 | 0.03     | -0.22 | 0.41     | 0.10  | NA   | nicolin 1                                                    | protein coding |
| ENSG00000164975 | SNAPC3  | 9  | -0.56 | 0.03     | 0.47  | 0.03     | 0.36  | NA   | small nuclear RNA activating complex polypeptide 3           | protein coding |
| ENSG00000100711 | ZFYVE21 | 14 | -0.56 | 0.04     | 0.58  | 0.01     | 0.32  | NA   | zinc finger FYVE-type containing 21                          | protein coding |
| ENSG00000112234 | FBXL4   | 6  | -0.56 | 0.04     | 0.64  | 4.02E-03 | 0.22  | NA   | F-box and leucine rich repeat protein 4                      | protein coding |
| ENSG00000100485 | SOS2    | 14 | -0.56 | 0.02     | 0.68  | 7.14E-04 | 0.40  | 0.15 | SOS Ras/Rho guanine nucleotide exchange factor 2             | protein coding |
| ENSG00000140455 | USP3    | 15 | -0.57 | 4.81E-04 | 0.53  | 1.28E-04 | 0.49  | NA   | ubiquitin specific peptidase 3                               | protein coding |
| ENSG00000130766 | SESN2   | 1  | -0.57 | 0.03     | 0.55  | 0.01     | 0.66  | NA   | sestrin 2                                                    | protein coding |
| ENSG00000121104 | FAM117A | 17 | -0.57 | 0.04     | 0.19  | 0.51     | 0.33  | 0.28 | family with sequence similarity 117 member A                 | protein coding |
| ENSG00000168936 | TMEM129 | 4  | -0.58 | 0.04     | 0.40  | 0.10     | 0.32  | 0.29 | transmembrane protein 129                                    | protein coding |
| ENSG00000106415 | GLCC1   | 7  | -0.58 | 0.03     | -0.66 | 3.34E-03 | 0.32  | 0.28 | glucocorticoid induced 1                                     | protein coding |
| ENSG00000120868 | APAF1   | 12 | -0.58 | 0.01     | 0.21  | 0.33     | 0.26  | 0.28 | apoptotic peptidase activating factor 1                      | protein coding |
| ENSG00000109118 | PHF12   | 17 | -0.58 | 0.04     | 0.41  | 0.10     | 0.14  | 0.66 | PHD finger protein 12                                        | protein coding |
| ENSG00000108262 | GIT1    | 17 | -0.58 | 0.03     | 0.45  | 0.05     | 0.24  | 0.39 | GIT ArfGAP 1                                                 | protein coding |
| ENSG00000170802 | FOXN2   | 2  | -0.59 | 0.02     | 0.34  | 0.15     | 0.51  | 0.09 | forkhead box N2                                              | protein coding |
| ENSG00000185798 | WDR53   | 3  | -0.59 | 0.04     | 0.74  | 1.16E-03 | 0.18  | NA   | WD repeat domain 53                                          | protein coding |
| ENSG00000181472 | ZBTB2   | 6  | -0.59 | 4.81E-04 | 0.77  | 4.94E-08 | 0.54  | NA   | zinc finger and BTB domain containing 2                      | protein coding |
| ENSG00000057935 | MTA3    | 2  | -0.59 | 0.05     | 0.78  | 1.52E-03 | 0.17  | NA   | metastasis associated 1 family member 3                      | protein coding |
| ENSG00000126775 | ATG14   | 14 | -0.59 | 0.03     | 0.59  | 0.01     | -0.02 | NA   | autophagy related 14                                         | protein coding |
| ENSG0000012983  | MAP4K5  | 14 | -0.60 | 0.02     | 0.57  | 0.01     | 0.04  | NA   | mitogen-activated protein kinase kinase kinase 5             | protein coding |
| ENSG00000163755 | HPS3    | 3  | -0.60 | 0.05     | 0.58  | 0.02     | 0.40  | NA   | HPS3, biogenesis of lysosomal organelles complex 2 subunit 1 | protein coding |
| ENSG00000139718 | SETD1B  | 12 | -0.60 | 0.03     | 1.06  | 1.94E-06 | 0.11  | 0.75 | SET domain containing 1B                                     | protein coding |
| ENSG00000143479 | DYRK3   | 1  | -0.60 | 0.01     | 1.21  | 1.02E-13 | 0.36  | NA   | dual specificity tyrosine phosphorylation regulated kinase 3 | protein coding |
| ENSG00000172530 | BANP    | 16 | -0.61 | 0.01     | -0.08 | 0.78     | 0.34  | NA   | BTG3 associated nuclear protein                              | protein coding |
| ENSG00000113851 | CRBN    | 3  | -0.61 | 3.98E-03 | 0.48  | 0.01     | 0.36  | NA   | cereblon                                                     | protein coding |
| ENSG00000173875 | ZNF791  | 19 | -0.61 | 0.01     | 0.70  | 5.03E-04 | 0.38  | NA   | zinc finger protein 791                                      | protein coding |
| ENSG00000070476 | ZXDC    | 3  | -0.61 | 0.02     | 0.26  | 0.31     | 0.16  | NA   | ZXD family zinc finger C                                     | protein coding |
| ENSG00000122678 | POLM    | 7  | -0.61 | 0.04     | 0.10  | 0.77     | 0.04  | NA   | DNA polymerase mu                                            | protein coding |
| ENSG00000243646 | IL10RB  | 21 | -0.62 | 0.03     | 0.69  | 2.65E-03 | 0.41  | NA   | interleukin 10 receptor subunit beta                         | protein coding |
| ENSG00000117155 | SSX2IP  | 1  | -0.62 | 0.04     | 0.36  | 0.20     | 0.35  | NA   | SSX family member 2 interacting protein                      | protein coding |
| ENSG00000181827 | RFX7    | 15 | -0.62 | 3.31E-03 | 0.64  | 3.90E-04 | 0.50  | 0.06 | regulatory factor X7                                         | protein coding |
| ENSG00000188997 | KCTD21  | 11 | -0.63 | 0.02     | 0.54  | 0.02     | 0.33  | NA   | potassium channel tetramerization domain containing 21       | protein coding |
| ENSG00000108312 | UBTF    | 17 | -0.63 | 0.02     | 0.11  | 0.73     | 0.52  | 0.10 | upstream binding transcription factor, RNA polymerase I      | protein coding |
| ENSG00000132405 | TBC1D14 | 4  | -0.63 | 0.04     | 0.56  | 0.03     | 0.48  | 0.16 | TBC1 domain family member 14                                 | protein coding |
| ENSG00000179918 | SEPHS2  | 16 | -0.63 | 0.05     | 0.40  | 0.18     | 0.67  | 0.07 | selenophosphate synthetase 2                                 | protein coding |
| ENSG00000134698 | AGO4    | 1  | -0.63 | 0.05     | -0.23 | 0.48     | 0.19  | NA   | argonaute 4, RISC catalytic component                        | protein coding |
| ENSG00000184939 | ZFP90   | 16 | -0.63 | 0.02     | 1.39  | 3.26E-12 | 0.42  | NA   | ZFP90 zinc finger protein                                    | protein coding |

|                 |             |    |       |          |       |          |       |      |                                                                     |                   |
|-----------------|-------------|----|-------|----------|-------|----------|-------|------|---------------------------------------------------------------------|-------------------|
| ENSG00000149091 | DGKZ        | 11 | -0.64 | 0.04     | 0.90  | 3.97E-04 | 0.35  | 0.30 | diacylglycerol kinase zeta                                          | protein coding    |
| ENSG00000145990 | GFOD1       | 6  | -0.64 | 0.02     | 0.03  | 0.92     | 0.30  | NA   | glucose-fructose oxidoreductase domain containing 1                 | protein coding    |
| ENSG00000166938 | DIS3L       | 15 | -0.64 | 0.01     | 0.34  | 0.14     | 0.34  | NA   | DIS3 like exosome 3'-5' exoribonuclease                             | protein coding    |
| ENSG00000134324 | LPIN1       | 2  | -0.65 | 0.02     | 0.69  | 2.65E-03 | 0.43  | 0.17 | lipin 1                                                             | protein coding    |
| ENSG00000100027 | YPEL1       | 22 | -0.65 | 0.03     | 0.24  | 0.44     | 0.23  | NA   | yippee like 1                                                       | protein coding    |
| ENSG00000111670 | GNPTAB      | 12 | -0.65 | 0.02     | 0.19  | 0.51     | 0.38  | 0.22 | N-acetylglucosamine-1-phosphate transferase alpha and beta subunits | protein coding    |
| ENSG00000149485 | FADS1       | 11 | -0.65 | 0.04     | 0.37  | 0.22     | 0.62  | NA   | fatty acid desaturase 1                                             | protein coding    |
| ENSG00000173950 | XXYL1       | 3  | -0.65 | 0.01     | 0.44  | 0.04     | 0.50  | NA   | xyloside xylosyltransferase 1                                       | protein coding    |
| ENSG00000162889 | MAPKAPK2    | 1  | -0.65 | 0.03     | 0.39  | 0.16     | 0.52  | 0.12 | mitogen-activated protein kinase-activated protein kinase 2         | protein coding    |
| ENSG00000132334 | PTPRE       | 10 | -0.65 | 0.04     | 0.38  | 0.19     | 0.49  | 0.16 | protein tyrosine phosphatase, receptor type E                       | protein coding    |
| ENSG00000174839 | DENND6A     | 3  | -0.66 | 0.03     | 0.42  | 0.13     | -0.07 | NA   | DENN domain containing 6A                                           | protein coding    |
| ENSG00000181666 | HKR1        | 19 | -0.66 | 0.03     | 0.76  | 1.94E-03 | 0.21  | NA   | HKR1, GLI-Kruppel zinc finger family member                         | protein coding    |
| ENSG00000146281 | PM20D2      | 6  | -0.67 | 0.02     | 1.01  | 2.46E-06 | 0.55  | NA   | peptidase M20 domain containing 2                                   | protein coding    |
| ENSG00000183688 | RFLNB       | 17 | -0.67 | 0.05     | 0.32  | 0.32     | 0.74  | 0.06 | refilin B                                                           | protein coding    |
| ENSG00000146263 | MMS22L      | 6  | -0.67 | 0.01     | 0.05  | 0.90     | 0.22  | NA   | MMS22 like, DNA repair protein                                      | protein coding    |
| ENSG00000159110 | IFNAR2      | 21 | -0.67 | 0.01     | 0.45  | 0.06     | 0.40  | 0.18 | interferon alpha and beta receptor subunit 2                        | protein coding    |
| ENSG00000149212 | SESN3       | 11 | -0.68 | 0.04     | 0.04  | 0.93     | 0.36  | NA   | sestrin 3                                                           | protein coding    |
| ENSG00000182504 | CEP97       | 3  | -0.68 | 0.02     | 0.64  | 0.01     | 0.37  | NA   | centrosomal protein 97                                              | protein coding    |
| ENSG00000178904 | DPY19L3     | 19 | -0.68 | 0.03     | 0.02  | 0.96     | 0.18  | NA   | dpy-19 like 3 (C, elegans)                                          | protein coding    |
| ENSG00000106479 | ZNF862      | 7  | -0.68 | 0.05     | 0.71  | 0.01     | 0.11  | NA   | zinc finger protein 862                                             | protein coding    |
| ENSG00000205730 | ITPRIPL2    | 16 | -0.68 | 0.01     | -0.25 | 0.33     | 0.31  | NA   | inositol 1,4,5-trisphosphate receptor interacting protein like 2    | protein coding    |
| ENSG00000167202 | TBC1D2B     | 15 | -0.68 | 0.04     | 0.38  | 0.23     | 0.34  | 0.35 | TBC1 domain family member 2B                                        | protein coding    |
| ENSG00000162437 | RAVER2      | 1  | -0.68 | 0.03     | 1.14  | 4.30E-06 | 0.42  | NA   | ribonucleoprotein, PTB binding 2                                    | protein coding    |
| ENSG00000153140 | CETN3       | 5  | -0.69 | 0.04     | -0.44 | 0.16     | 0.37  | NA   | centrin 3                                                           | protein coding    |
| ENSG00000162636 | FAM102B     | 1  | -0.70 | 0.01     | 0.16  | 0.59     | 0.61  | NA   | family with sequence similarity 102 member B                        | protein coding    |
| ENSG00000260822 | GS1-358P8,4 | X  | -0.70 | 0.03     | 0.81  | 2.01E-03 | 0.53  | NA   |                                                                     | sense overlapping |
| ENSG00000204859 | ZBTB48      | 1  | -0.70 | 0.05     | 0.42  | 0.20     | 0.21  | NA   | zinc finger and BTB domain containing 48                            | protein coding    |
| ENSG00000136451 | VEZF1       | 17 | -0.70 | 9.96E-09 | 0.52  | 5.81E-06 | 0.38  | 0.02 | vascular endothelial zinc finger 1                                  | protein coding    |
| ENSG00000162378 | ZYG11B      | 1  | -0.70 | 0.04     | 0.97  | 5.90E-04 | 0.58  | NA   | zyg-11 family member B, cell cycle regulator                        | protein coding    |
| ENSG00000082438 | COBLL1      | 2  | -0.70 | 0.02     | 0.35  | 0.20     | 0.37  | 0.26 | cordons-bleu WH2 repeat protein like 1                              | protein coding    |
| ENSG00000189308 | LIN54       | 4  | -0.71 | 0.03     | 0.50  | 0.07     | 0.43  | NA   | lin-54 DREAM MuvB core complex component                            | protein coding    |
| ENSG00000141858 | SAMD1       | 19 | -0.71 | 0.02     | 0.33  | 0.26     | 0.47  | NA   | sterile alpha motif domain containing 1                             | protein coding    |
| ENSG00000167106 | FAM102A     | 9  | -0.71 | 0.04     | -0.05 | 0.90     | 0.59  | NA   | family with sequence similarity 102 member A                        | protein coding    |
| ENSG00000103064 | SLC7A6      | 16 | -0.71 | 0.03     | -0.52 | 0.08     | 0.28  | 0.43 | solute carrier family 7 member 6                                    | protein coding    |
| ENSG00000177084 | POLE        | 12 | -0.71 | 0.01     | -0.05 | 0.89     | 0.33  | 0.29 | DNA polymerase epsilon, catalytic subunit                           | protein coding    |
| ENSG00000196693 | ZNF33B      | 10 | -0.71 | 4.98E-03 | 0.58  | 0.01     | 0.30  | NA   | zinc finger protein 33B                                             | protein coding    |
| ENSG00000186951 | PPARA       | 22 | -0.71 | 0.01     | 0.27  | 0.32     | 0.37  | 0.23 | peroxisome proliferator activated receptor alpha                    | protein coding    |
| ENSG00000101190 | TCFL5       | 20 | -0.72 | 0.05     | 0.76  | 0.01     | 0.24  | NA   | transcription factor like 5                                         | protein coding    |
| ENSG00000167470 | MIDN        | 19 | -0.72 | 2.34E-03 | 0.12  | 0.68     | 0.36  | NA   | midnolin                                                            | protein coding    |
| ENSG00000171492 | LRRRC8D     | 1  | -0.72 | 0.04     | 0.49  | 0.13     | 0.68  | 0.10 | leucine rich repeat containing 8 family member D                    | protein coding    |

|                 |            |    |       |          |       |          |       |      |                                                             |                |
|-----------------|------------|----|-------|----------|-------|----------|-------|------|-------------------------------------------------------------|----------------|
| ENSG00000163818 | LZTFL1     | 3  | -0.73 | 0.01     | 0.67  | 0.01     | 0.44  | NA   | leucine zipper transcription factor like 1                  | protein coding |
| ENSG00000168297 | PXK        | 3  | -0.73 | 0.03     | 0.88  | 1.10E-03 | 0.63  | 0.10 | PX domain containing serine/threonine kinase like           | protein coding |
| ENSG00000160271 | RALGDS     | 9  | -0.73 | 0.02     | 0.05  | 0.89     | -0.01 | NA   | ral guanine nucleotide dissociation stimulator              | protein coding |
| ENSG00000197008 | ZNF138     | 7  | -0.73 | 0.05     | 0.32  | 0.38     | 0.34  | NA   | zinc finger protein 138                                     | protein coding |
| ENSG00000110721 | CHKA       | 11 | -0.73 | 0.02     | 0.32  | 0.30     | 0.51  | NA   | choline kinase alpha                                        | protein coding |
| ENSG00000176014 | TUBB6      | 18 | -0.74 | 0.01     | 0.17  | 0.60     | 0.60  | 0.09 | tubulin beta 6 class V                                      | protein coding |
| ENSG00000178966 | RMI1       | 9  | -0.74 | 0.04     | 0.63  | 0.04     | 0.75  | NA   | RecQ mediated genome instability 1                          | protein coding |
| ENSG00000177169 | ULK1       | 12 | -0.74 | 0.05     | 0.53  | 0.12     | 0.30  | 0.46 | unc-51 like autophagy activating kinase 1                   | protein coding |
| ENSG00000169826 | CSGALNACT2 | 10 | -0.74 | 4.81E-04 | 0.89  | 8.12E-07 | 0.25  | 0.31 | chondroitin sulfate N-acetylgalactosaminyltransferase 2     | protein coding |
| ENSG00000117625 | RCOR3      | 1  | -0.74 | 0.03     | -0.24 | 0.52     | 0.31  | NA   | REST corepressor 3                                          | protein coding |
| ENSG00000085644 | ZNF213     | 16 | -0.75 | 0.05     | 0.48  | 0.16     | 0.43  | NA   | zinc finger protein 213                                     | protein coding |
| ENSG00000133874 | RNF122     | 8  | -0.75 | 0.03     | 0.77  | 0.01     | 0.76  | NA   | ring finger protein 122                                     | protein coding |
| ENSG00000096654 | ZNF184     | 6  | -0.75 | 0.01     | 0.68  | 0.01     | 0.44  | NA   | zinc finger protein 184                                     | protein coding |
| ENSG00000128923 | MINDY2     | 15 | -0.75 | 0.03     | -0.14 | 0.72     | 0.43  | NA   | MINDY lysine 48 deubiquitinase 2                            | protein coding |
| ENSG00000103199 | ZNF500     | 16 | -0.75 | 0.02     | 0.59  | 0.04     | 0.27  | NA   | zinc finger protein 500                                     | protein coding |
| ENSG00000114739 | ACVR2B     | 3  | -0.75 | 0.02     | 0.75  | 0.01     | 0.61  | NA   | activin A receptor type 2B                                  | protein coding |
| ENSG00000059145 | UNKL       | 16 | -0.75 | 0.03     | 0.95  | 1.07E-03 | 0.22  | NA   | unkempt family like zinc finger                             | protein coding |
| ENSG00000164048 | ZNF589     | 3  | -0.76 | 0.05     | 0.29  | 0.45     | 0.06  | 0.89 | zinc finger protein 589                                     | protein coding |
| ENSG00000111554 | MDM1       | 12 | -0.76 | 0.01     | 0.70  | 0.01     | 0.15  | NA   | Mdm1 nuclear protein                                        | protein coding |
| ENSG00000179833 | SERTAD2    | 2  | -0.76 | 0.04     | 0.69  | 0.03     | 0.62  | 0.14 | SERTA domain containing 2                                   | protein coding |
| ENSG00000198825 | INPP5F     | 10 | -0.77 | 0.02     | -0.83 | 2.65E-03 | 0.18  | 0.63 | inositol polyphosphate-5-phosphatase F                      | protein coding |
| ENSG00000140450 | ARRDC4     | 15 | -0.78 | 0.04     | 0.76  | 0.01     | 0.29  | NA   | arrestin domain containing 4                                | protein coding |
| ENSG00000011523 | CEP68      | 2  | -0.78 | 0.02     | 0.60  | 0.04     | 0.67  | 0.08 | centrosomal protein 68                                      | protein coding |
| ENSG00000084093 | REST       | 4  | -0.78 | 0.02     | 0.52  | 0.08     | 0.40  | 0.27 | RE1 silencing transcription factor                          | protein coding |
| ENSG00000105643 | ARRDC2     | 19 | -0.79 | 0.05     | 0.07  | 0.88     | 0.37  | NA   | arrestin domain containing 2                                | protein coding |
| ENSG00000095015 | MAP3K1     | 5  | -0.80 | 4.51E-03 | 0.80  | 8.79E-04 | 0.61  | 0.08 | mitogen-activated protein kinase kinase kinase 1            | protein coding |
| ENSG00000107819 | SFXN3      | 10 | -0.80 | 0.02     | -0.23 | 0.53     | 0.27  | NA   | sideroflexin 3                                              | protein coding |
| ENSG00000181035 | SLC25A42   | 19 | -0.80 | 2.71E-03 | 0.75  | 1.22E-03 | 0.46  | NA   | solute carrier family 25 member 42                          | protein coding |
| ENSG00000165322 | ARHGAP12   | 10 | -0.80 | 0.04     | 0.40  | 0.29     | 0.41  | NA   | Rho GTPase activating protein 12                            | protein coding |
| ENSG00000121989 | ACVR2A     | 2  | -0.80 | 0.03     | 0.40  | 0.24     | 0.43  | NA   | activin A receptor type 2A                                  | protein coding |
| ENSG00000167977 | KCTD5      | 16 | -0.81 | 1.69E-04 | 0.89  | 1.59E-06 | 0.58  | 0.03 | potassium channel tetramerization domain containing 5       | protein coding |
| ENSG00000064999 | ANKS1A     | 6  | -0.81 | 0.01     | 0.53  | 0.05     | 0.64  | 0.08 | ankyrin repeat and sterile alpha motif domain containing 1A | protein coding |
| ENSG00000206560 | ANKRD28    | 3  | -0.82 | 0.02     | -0.28 | 0.42     | 0.33  | NA   | ankyrin repeat domain 28                                    | protein coding |
| ENSG00000118276 | B4GALT6    | 18 | -0.82 | 0.03     | 0.09  | 0.84     | 0.48  | NA   | beta-1,4-galactosyltransferase 6                            | protein coding |
| ENSG00000165813 | CCDC186    | 10 | -0.83 | 4.12E-03 | 0.46  | 0.09     | 0.43  | 0.20 | coiled-coil domain containing 186                           | protein coding |
| ENSG00000134242 | PTPN22     | 1  | -0.83 | 0.02     | -1.12 | 1.20E-04 | 0.41  | NA   | protein tyrosine phosphatase, non-receptor type 22          | protein coding |
| ENSG00000061273 | HDAC7      | 12 | -0.83 | 0.04     | -0.04 | 0.93     | 0.44  | NA   | histone deacetylase 7                                       | protein coding |
| ENSG00000047346 | FAM214A    | 15 | -0.83 | 0.03     | 0.04  | 0.93     | 0.14  | 0.75 | family with sequence similarity 214 member A                | protein coding |
| ENSG00000113369 | ARRDC3     | 5  | -0.83 | 0.05     | 0.84  | 0.02     | 0.51  | NA   | arrestin domain containing 3                                | protein coding |
| ENSG00000198743 | SLC5A3     | 21 | -0.83 | 4.79E-04 | -0.02 | 0.94     | 0.28  | 0.32 | solute carrier family 5 member 3                            | protein coding |

|                 |            |    |       |          |       |          |      |      |                                                                  |                      |
|-----------------|------------|----|-------|----------|-------|----------|------|------|------------------------------------------------------------------|----------------------|
| ENSG00000124496 | TRERF1     | 6  | -0.83 | 0.02     | 0.15  | 0.72     | 0.56 | NA   | transcriptional regulating factor 1                              | protein coding       |
| ENSG00000148411 | NACC2      | 9  | -0.83 | 0.01     | 0.63  | 0.03     | 0.54 | NA   | NACC family member 2                                             | protein coding       |
| ENSG00000047056 | WDR37      | 10 | -0.84 | 0.03     | 0.23  | 0.57     | 0.66 | 0.12 | WD repeat domain 37                                              | protein coding       |
| ENSG00000099992 | TBC1D10A   | 22 | -0.84 | 0.02     | 0.54  | 0.10     | 0.54 | NA   | TBC1 domain family member 10A                                    | protein coding       |
| ENSG00000114120 | SLC25A36   | 3  | -0.84 | 0.01     | 0.88  | 5.86E-04 | 0.66 | NA   | solute carrier family 25 member 36                               | protein coding       |
| ENSG00000198901 | PRC1       | 15 | -0.84 | 0.04     | -0.04 | 0.94     | 0.62 | NA   | protein regulator of cytokinesis 1                               | protein coding       |
| ENSG00000127980 | PEX1       | 7  | -0.85 | 0.04     | 0.24  | 0.58     | 0.15 | NA   | peroxisomal biogenesis factor 1                                  | protein coding       |
| ENSG00000185730 | ZNF696     | 8  | -0.85 | 0.04     | 0.79  | 0.03     | 0.38 | NA   | zinc finger protein 696                                          | protein coding       |
| ENSG00000073060 | SCARB1     | 12 | -0.85 | 2.26E-03 | 0.27  | 0.35     | 0.51 | NA   | scavenger receptor class B member 1                              | protein coding       |
| ENSG00000100055 | CYTH4      | 22 | -0.86 | 0.04     | 1.13  | 8.45E-04 | 0.66 | 0.15 | cytohesin 4                                                      | protein coding       |
| ENSG00000112195 | TREML2     | 6  | -0.86 | 0.04     | 0.37  | 0.37     | 0.76 | 0.11 | triggering receptor expressed on myeloid cells like 2            | protein coding       |
| ENSG00000198324 | FAM109A    | 12 | -0.86 | 0.05     | -0.38 | 0.38     | 0.35 | NA   | family with sequence similarity 109 member A                     | protein coding       |
| ENSG00000175463 | TBC1D10C   | 11 | -0.87 | 0.03     | -0.59 | 0.10     | 0.60 | NA   | TBC1 domain family member 10C                                    | protein coding       |
| ENSG00000133059 | DSTYK      | 1  | -0.87 | 0.02     | 0.84  | 0.01     | 0.74 | NA   | dual serine/threonine and tyrosine protein kinase                | protein coding       |
| ENSG00000111696 | NT5DC3     | 12 | -0.87 | 0.05     | 0.74  | 0.05     | 0.36 | NA   | 5'-nucleotidase domain containing 3                              | protein coding       |
| ENSG00000179859 | AC025335,1 | 17 | -0.88 | 0.03     | 0.59  | 0.11     | 0.34 | NA   |                                                                  | protein coding       |
| ENSG00000147872 | PLIN2      | 9  | -0.88 | 2.18E-03 | 0.06  | 0.88     | 0.34 | NA   | perilipin 2                                                      | protein coding       |
| ENSG00000144161 | ZC3H8      | 2  | -0.88 | 0.03     | 0.51  | 0.17     | 0.03 | NA   | zinc finger CCCH-type containing 8                               | protein coding       |
| ENSG00000125648 | SLC25A23   | 19 | -0.88 | 0.03     | -0.43 | 0.30     | 0.28 | NA   | solute carrier family 25 member 23                               | protein coding       |
| ENSG00000099250 | NRP1       | 10 | -0.88 | 0.05     | 0.46  | 0.28     | 0.88 | 0.09 | neuropilin 1                                                     | protein coding       |
| ENSG00000181908 | AP003774,4 | 11 | -0.88 | 0.05     | 0.65  | 0.10     | 0.65 | NA   |                                                                  | lincRNA              |
| ENSG00000169991 | IFFO2      | 1  | -0.89 | 0.04     | 0.88  | 0.01     | 0.84 | NA   | intermediate filament family orphan 2                            | protein coding       |
| ENSG00000138050 | THUMP2     | 2  | -0.89 | 0.02     | 0.59  | 0.08     | 0.49 | NA   | THUMP domain containing 2                                        | protein coding       |
| ENSG00000229417 | NPM1P25    | 10 | -0.89 | 0.02     | 0.93  | 4.49E-03 | 0.51 | NA   | nucleophosmin 1 pseudogene 25                                    | processed pseudogene |
| ENSG00000118308 | LRMP       | 12 | -0.90 | 0.02     | -0.09 | 0.85     | 0.39 | 0.35 | lymphoid restricted membrane protein                             | protein coding       |
| ENSG00000152133 | GPATCH11   | 2  | -0.91 | 0.02     | 0.28  | 0.50     | 0.64 | 0.15 | G-patch domain containing 11                                     | protein coding       |
| ENSG00000165424 | ZCCHC24    | 10 | -0.91 | 0.01     | 0.81  | 0.01     | 0.69 | NA   | zinc finger CCHC-type containing 24                              | protein coding       |
| ENSG00000198799 | LRIG2      | 1  | -0.92 | 0.05     | 0.53  | 0.22     | 0.21 | NA   | leucine rich repeats and immunoglobulin like domains 2           | protein coding       |
| ENSG00000137414 | FAM8A1     | 6  | -0.92 | 0.04     | -0.10 | 0.85     | 0.56 | NA   | family with sequence similarity 8 member A1                      | protein coding       |
| ENSG00000152409 | JMY        | 5  | -0.92 | 0.02     | 0.71  | 0.04     | 0.62 | NA   | junction mediating and regulatory protein, p53 cofactor          | protein coding       |
| ENSG00000158717 | RNF166     | 16 | -0.93 | 0.02     | 0.30  | 0.45     | 0.55 | 0.21 | ring finger protein 166                                          | protein coding       |
| ENSG00000173621 | LRFN4      | 11 | -0.94 | 0.04     | 0.28  | 0.56     | 0.68 | NA   | leucine rich repeat and fibronectin type III domain containing 4 | protein coding       |
| ENSG00000163328 | GPR155     | 2  | -0.94 | 0.01     | -0.01 | 0.99     | 0.49 | NA   | G protein-coupled receptor 155                                   | protein coding       |
| ENSG00000198551 | ZNF627     | 19 | -0.94 | 0.04     | 0.84  | 0.03     | 0.92 | NA   | zinc finger protein 627                                          | protein coding       |
| ENSG00000132613 | MTSS1L     | 16 | -0.94 | 0.02     | 0.16  | 0.74     | 0.46 | NA   | MTSS1L, I-BAR domain containing                                  | protein coding       |
| ENSG00000143816 | WNT9A      | 1  | -0.94 | 0.03     | 1.21  | 7.00E-04 | 0.74 | NA   | Wnt family member 9A                                             | protein coding       |
| ENSG00000128165 | ADM2       | 22 | -0.96 | 0.04     | -0.24 | 0.64     | 0.78 | NA   | adrenomedullin 2                                                 | protein coding       |
| ENSG00000118263 | KLF7       | 2  | -0.96 | 0.02     | 0.22  | 0.63     | 0.42 | NA   | Kruppel like factor 7                                            | protein coding       |
| ENSG00000176454 | LPCAT4     | 15 | -0.96 | 0.05     | -0.51 | 0.27     | 0.24 | NA   | lysophosphatidylcholine acyltransferase 4                        | protein coding       |
| ENSG00000175087 | PDIK1L     | 1  | -0.96 | 3.41E-03 | 0.69  | 0.02     | 0.67 | NA   | PDLIM1 interacting kinase 1 like                                 | protein coding       |

|                 |           |    |       |          |       |          |       |      |                                                                         |                |
|-----------------|-----------|----|-------|----------|-------|----------|-------|------|-------------------------------------------------------------------------|----------------|
| ENSG00000198740 | ZNF652    | 17 | -0.97 | 0.01     | 1.13  | 3.67E-04 | 0.62  | NA   | zinc finger protein 652                                                 | protein coding |
| ENSG00000251022 | THAP9-AS1 | 4  | -0.98 | 0.01     | 1.16  | 3.22E-04 | -0.12 | NA   | THAP9 antisense RNA 1                                                   | antisense      |
| ENSG00000185432 | METTL7A   | 12 | -0.98 | 0.05     | -0.35 | 0.50     | 0.68  | 0.22 | methyltransferase like 7A                                               | protein coding |
| ENSG00000131791 | PRKAB2    | 1  | -0.98 | 0.01     | 0.76  | 0.02     | 0.19  | NA   | protein kinase AMP-activated non-catalytic subunit beta 2               | protein coding |
| ENSG00000131242 | RAB11FIP4 | 17 | -0.99 | 0.03     | 1.12  | 3.96E-03 | 0.76  | NA   | RAB11 family interacting protein 4                                      | protein coding |
| ENSG00000136931 | NR5A1     | 9  | -1.00 | 0.02     | 0.57  | 0.17     | 0.76  | NA   | nuclear receptor subfamily 5 group A member 1                           | protein coding |
| ENSG00000114796 | KLHL24    | 3  | -1.00 | 0.03     | 1.44  | 1.58E-04 | 0.92  | 0.09 | kelch like family member 24                                             | protein coding |
| ENSG00000176903 | PNMA1     | 14 | -1.00 | 3.86E-03 | 0.72  | 0.02     | 0.61  | NA   | paraneoplastic Ma antigen 1                                             | protein coding |
| ENSG00000180891 | CUEDC1    | 17 | -1.01 | 0.01     | 0.28  | 0.47     | 0.52  | 0.23 | CUE domain containing 1                                                 | protein coding |
| ENSG00000129911 | KLF16     | 19 | -1.01 | 0.02     | 0.96  | 0.01     | 0.80  | 0.10 | Kruppel like factor 16                                                  | protein coding |
| ENSG00000162929 | KIAA1841  | 2  | -1.02 | 0.05     | 0.03  | 0.96     | 0.12  | NA   | KIAA1841                                                                | protein coding |
| ENSG00000105245 | NUMBL     | 19 | -1.02 | 0.02     | 0.81  | 0.03     | 0.67  | NA   | NUMB like, endocytic adaptor protein                                    | protein coding |
| ENSG00000124813 | RUNX2     | 6  | -1.02 | 0.01     | 0.58  | 0.09     | 0.49  | 0.25 | runt related transcription factor 2                                     | protein coding |
| ENSG00000101298 | SNPH      | 20 | -1.02 | 0.05     | 0.39  | 0.45     | 0.90  | NA   | syntaphilin                                                             | protein coding |
| ENSG00000198105 | ZNF248    | 10 | -1.02 | 0.02     | 0.16  | 0.74     | 0.33  | NA   | zinc finger protein 248                                                 | protein coding |
| ENSG00000164938 | TP53INP1  | 8  | -1.02 | 0.02     | 0.54  | 0.21     | 0.65  | NA   | tumor protein p53 inducible nuclear protein 1                           | protein coding |
| ENSG00000178695 | KCTD12    | 13 | -1.04 | 2.34E-03 | 0.63  | 0.05     | 0.96  | 0.02 | potassium channel tetramerization domain containing 12                  | protein coding |
| ENSG00000157404 | KIT       | 4  | -1.05 | 0.03     | -0.03 | 0.97     | 0.93  | NA   | KIT proto-oncogene receptor tyrosine kinase                             | protein coding |
| ENSG00000101751 | POLI      | 18 | -1.06 | 0.03     | 0.20  | 0.72     | -0.14 | NA   | DNA polymerase iota                                                     | protein coding |
| ENSG00000133056 | PIK3C2B   | 1  | -1.06 | 0.02     | -0.16 | 0.77     | 0.62  | NA   | phosphatidylinositol-4-phosphate 3-kinase catalytic subunit type 2 beta | protein coding |
| ENSG00000180539 | C9orf139  | 9  | -1.07 | 0.04     | -1.25 | 0.01     | -0.07 | NA   | chromosome 9 open reading frame 139                                     | antisense      |
| ENSG00000152804 | HHEX      | 10 | -1.07 | 0.03     | 0.95  | 0.03     | 0.88  | 0.12 | hematopoietically expressed homeobox                                    | protein coding |
| ENSG00000120784 | ZFP30     | 19 | -1.07 | 0.01     | 0.62  | 0.12     | 0.35  | NA   | ZFP30 zinc finger protein                                               | protein coding |
| ENSG00000197299 | BLM       | 15 | -1.08 | 0.04     | -0.11 | 0.87     | 0.81  | NA   | Bloom syndrome RecQ like helicase                                       | protein coding |
| ENSG00000146674 | IGFBP3    | 7  | -1.09 | 0.03     | 0.56  | 0.23     | 0.92  | 0.10 | insulin like growth factor binding protein 3                            | protein coding |
| ENSG00000036530 | CYP46A1   | 14 | -1.09 | 0.02     | 1.23  | 1.40E-03 | 0.05  | NA   | cytochrome P450 family 46 subfamily A member 1                          | protein coding |
| ENSG00000152518 | ZFP36L2   | 2  | -1.10 | 0.03     | 0.81  | 0.07     | 0.93  | 0.11 | ZFP36 ring finger protein like 2                                        | protein coding |
| ENSG00000132359 | RAP1GAP2  | 17 | -1.10 | 2.36E-03 | 0.44  | 0.23     | 0.38  | 0.36 | RAP1 GTPase activating protein 2                                        | protein coding |
| ENSG00000165300 | SLITRK5   | 13 | -1.10 | 0.03     | 0.17  | 0.77     | 0.97  | NA   | SLIT and NTRK like family member 5                                      | protein coding |
| ENSG00000185112 | FAM43A    | 3  | -1.11 | 8.79E-05 | 0.24  | 0.45     | 0.70  | NA   | family with sequence similarity 43 member A                             | protein coding |
| ENSG00000128274 | A4GALT    | 22 | -1.12 | 0.01     | 1.12  | 2.02E-03 | 1.08  | NA   | alpha 1,4-galactosyltransferase                                         | protein coding |
| ENSG00000155926 | SLA       | 8  | -1.12 | 0.04     | -0.03 | 0.96     | 0.78  | NA   | Src like adaptor                                                        | protein coding |
| ENSG00000175197 | DDIT3     | 12 | -1.15 | 0.03     | 0.52  | 0.31     | 0.68  | NA   | DNA damage inducible transcript 3                                       | protein coding |
| ENSG00000007968 | E2F2      | 1  | -1.16 | 0.04     | 0.49  | 0.38     | 0.93  | 0.14 | E2F transcription factor 2                                              | protein coding |
| ENSG00000162373 | BEND5     | 1  | -1.17 | 0.03     | 0.48  | 0.38     | 0.63  | NA   | BEN domain containing 5                                                 | protein coding |
| ENSG00000134531 | EMP1      | 12 | -1.17 | 0.03     | -0.58 | 0.29     | -0.02 | NA   | epithelial membrane protein 1                                           | protein coding |
| ENSG00000175155 | YPEL2     | 17 | -1.17 | 1.49E-03 | 0.74  | 0.03     | 0.74  | NA   | yippee like 2                                                           | protein coding |
| ENSG00000255389 | C6orf3    | 6  | -1.17 | 0.03     | 0.63  | 0.21     | 0.71  | NA   |                                                                         | antisense      |
| ENSG00000183496 | MEX3B     | 15 | -1.18 | 0.03     | -0.85 | 0.08     | 0.46  | NA   | mex-3 RNA binding family member B                                       | protein coding |
| ENSG00000177706 | FAM20C    | 7  | -1.18 | 0.05     | 0.44  | 0.48     | 0.97  | NA   | FAM20C, golgi associated secretory pathway kinase                       | protein coding |
| ENSG00000241852 | C8orf58   | 8  | -1.19 | 0.02     | -0.62 | 0.23     | 0.44  | NA   | chromosome 8 open reading frame 58                                      | protein coding |
| ENSG00000105327 | BBC3      | 19 | -1.21 | 0.05     | 0.66  | 0.25     | 0.89  | NA   | BCL2 binding component 3                                                | protein coding |

|                 |                |    |       |          |       |          |       |      |                                                        |                        |
|-----------------|----------------|----|-------|----------|-------|----------|-------|------|--------------------------------------------------------|------------------------|
| ENSG00000131149 | GSE1           | 16 | -1.23 | 0.01     | 0.97  | 0.02     | 0.88  | NA   | Gse1 coiled-coil protein                               | protein coding         |
| ENSG00000163823 | CCR1           | 3  | -1.24 | 0.03     | -0.15 | 0.83     | 1.02  | NA   | C-C motif chemokine receptor 1                         | protein coding         |
| ENSG00000126351 | THRA           | 17 | -1.25 | 0.03     | 0.96  | 0.06     | 0.70  | NA   | thyroid hormone receptor, alpha                        | protein coding         |
| ENSG00000127528 | KLF2           | 19 | -1.25 | 0.03     | 0.04  | 0.96     | 0.27  | NA   | Kruppel like factor 2                                  | protein coding         |
| ENSG00000213626 | LBH            | 2  | -1.26 | 2.20E-03 | -0.35 | 0.43     | 0.88  | NA   | limb bud and heart development                         | protein coding         |
| ENSG00000154856 | APCDD1         | 18 | -1.28 | 0.03     | 0.32  | 0.62     | 1.23  | NA   | APC down-regulated 1                                   | protein coding         |
| ENSG00000198948 | MFAP3L         | 4  | -1.28 | 0.04     | -0.50 | 0.45     | 0.67  | NA   | microfibrillar associated protein 3 like               | protein coding         |
| ENSG00000103066 | PLA2G15        | 16 | -1.28 | 0.02     | 1.41  | 2.05E-03 | 1.19  | 0.07 | phospholipase A2 group XV                              | protein coding         |
| ENSG00000139318 | DUSP6          | 12 | -1.29 | 4.81E-04 | -0.19 | 0.68     | -0.12 | NA   | dual specificity phosphatase 6                         | protein coding         |
| ENSG00000135750 | KCNK1          | 1  | -1.30 | 0.01     | 1.16  | 0.01     | 0.91  | NA   | potassium two pore domain channel subfamily K member 1 | protein coding         |
| ENSG00000276043 | UHRF1          | 19 | -1.31 | 0.02     | -0.41 | 0.47     | 0.76  | NA   | ubiquitin like with PHD and ring finger domains 1      | protein coding         |
| ENSG00000213965 | NUDT19         | 19 | -1.33 | 0.02     | 1.94  | 1.93E-05 | 1.55  | NA   | nudix hydrolase 19                                     | protein coding         |
| ENSG00000277048 | NA             | NA | -1.34 | 0.02     | 0.30  | 0.62     | 0.29  | NA   | NA                                                     | NA                     |
| ENSG00000279496 | NA             | NA | -1.34 | 0.01     | 1.49  | 7.54E-04 | 0.94  | NA   | NA                                                     | NA                     |
| ENSG00000156804 | FBXO32         | 8  | -1.34 | 0.02     | 0.72  | 0.20     | 0.85  | NA   | F-box protein 32                                       | protein coding         |
| ENSG00000185669 | SNAI3          | 16 | -1.35 | 0.04     | 0.46  | 0.49     | 1.07  | NA   | snail family transcriptional repressor 3               | protein coding         |
| ENSG00000116852 | KIF21B         | 1  | -1.35 | 2.09E-04 | -0.42 | 0.29     | 0.62  | NA   | kinesin family member 21B                              | protein coding         |
| ENSG00000123384 | LRP1           | 12 | -1.37 | 0.02     | -0.76 | 0.17     | -0.47 | NA   | LDL receptor related protein 1                         | protein coding         |
| ENSG00000067191 | CACNB1         | 17 | -1.37 | 0.01     | 0.07  | 0.92     | 0.08  | NA   | calcium voltage-gated channel auxiliary subunit beta 1 | protein coding         |
| ENSG00000113758 | DBN1           | 5  | -1.37 | 0.03     | 0.82  | 0.17     | 1.13  | NA   | drebrin 1                                              | protein coding         |
| ENSG00000069702 | TGFBR3         | 1  | -1.40 | 0.01     | 0.83  | 0.12     | 1.11  | NA   | transforming growth factor beta receptor 3             | protein coding         |
| ENSG00000196220 | SRGAP3         | 3  | -1.42 | 0.05     | 1.29  | 0.04     | 0.70  | NA   | SLIT-ROBO Rho GTPase activating protein 3              | protein coding         |
| ENSG00000109881 | CCDC34         | 11 | -1.42 | 0.02     | 0.34  | 0.62     | 1.14  | NA   | coiled-coil domain containing 34                       | protein coding         |
| ENSG00000090447 | TFAP4          | 16 | -1.43 | 0.01     | 1.09  | 0.03     | 1.14  | NA   | transcription factor AP-4                              | protein coding         |
| ENSG00000168010 | ATG16L2        | 11 | -1.44 | 0.05     | 0.36  | 0.65     | -0.57 | NA   | autophagy related 16 like 2                            | protein coding         |
| ENSG00000101695 | RNF125         | 18 | -1.46 | 0.03     | 0.05  | 0.95     | 0.90  | NA   | ring finger protein 125                                | protein coding         |
| ENSG00000166825 | ANPEP          | 15 | -1.47 | 0.02     | -0.17 | 0.83     | 0.17  | NA   | alanyl aminopeptidase, membrane                        | protein coding         |
| ENSG00000198835 | GJC2           | 1  | -1.47 | 0.01     | 0.65  | 0.21     | 0.98  | NA   | gap junction protein gamma 2                           | protein coding         |
| ENSG00000124882 | EREG           | 4  | -1.50 | 0.04     | -1.02 | 0.13     | -1.11 | NA   | epiregulin                                             | protein coding         |
| ENSG00000102760 | RGCC           | 13 | -1.51 | 0.03     | -0.75 | 0.28     | 0.37  | NA   | regulator of cell cycle                                | protein coding         |
| ENSG00000134955 | SLC37A2        | 11 | -1.54 | 1.52E-03 | -0.41 | 0.47     | 0.84  | NA   | solute carrier family 37 member 2                      | protein coding         |
| ENSG00000004399 | PLXND1         | 3  | -1.54 | 3.11E-03 | -0.21 | 0.73     | 0.89  | NA   | plexin D1                                              | protein coding         |
| ENSG00000178732 | GP5            | 3  | -1.58 | 3.11E-03 | -0.18 | 0.79     | 1.23  | NA   | glycoprotein V platelet                                | protein coding         |
| ENSG00000085265 | FCN1           | 9  | -1.63 | 0.04     | 1.14  | 0.11     | 0.36  | NA   | ficolin 1                                              | protein coding         |
| ENSG00000205336 | ADGRG1         | 16 | -1.63 | 0.02     | 0.04  | 0.96     | 0.45  | NA   | adhesion G protein-coupled receptor G1                 | protein coding         |
| ENSG00000099953 | MMP11          | 22 | -1.66 | 0.01     | 0.93  | 0.11     | 1.41  | NA   | matrix metalloproteinase 11                            | protein coding         |
| ENSG00000236717 | RP11-100G15,10 | 9  | -1.69 | 0.03     | -0.35 | 0.69     | 1.03  | NA   |                                                        | unprocessed pseudogene |
| ENSG00000138061 | CYP1B1         | 2  | -1.75 | 1.45E-03 | -1.18 | 0.02     | 0.35  | NA   | cytochrome P450 family 1 subfamily B member 1          | protein coding         |
| ENSG00000187474 | FPR3           | 19 | -1.76 | 0.01     | 0.90  | 0.15     | 0.67  | NA   | formyl peptide receptor 3                              | protein coding         |
| ENSG00000091972 | CD200          | 3  | -1.76 | 0.01     | 0.99  | 0.14     | 1.07  | NA   | CD200 molecule                                         | protein coding         |
| ENSG00000202198 | 7SK            | 6  | -1.80 | 0.02     | -0.34 | 0.69     | 0.02  | NA   | 7SK RNA                                                | misc RNA               |



|                 |        |    |       |          |       |      |       |    |                                        |                |
|-----------------|--------|----|-------|----------|-------|------|-------|----|----------------------------------------|----------------|
| ENSG00000108551 | RASD1  | 17 | -1.90 | 1.41E-05 | 0.94  | 0.02 | 1.38  | NA | ras related dexamethasone induced 1    | protein coding |
| ENSG00000258227 | CLEC5A | 7  | -2.60 | 8.85E-05 | 0.57  | 0.45 | 0.73  | NA | C-type lectin domain family 5 member A | protein coding |
| ENSG00000137801 | THBS1  | 15 | -2.77 | 4.71E-07 | -1.44 | 0.01 | -0.16 | NA | thrombospondin 1                       | protein coding |
| ENSG00000170458 | CD14   | 5  | -2.79 | 3.21E-06 | 1.40  | 0.02 | 0.51  | NA | CD14 molecule                          | protein coding |
| ENSG00000038427 | VCAN   | 5  | -3.66 | 3.73E-11 | -0.47 | 0.51 | -0.01 | NA | versican                               | protein coding |
