# Supplementary material for: Cytokine production by activated plasmacytoid dendritic cells and natural killer cells is suppressed by an IRAK4 inhibitor
Source: Springer Nature journal article supplement (doi:10.1186/s13075-018-1702-0), 2018-10-24
Supplement: MOESM8 [file 16222790]

**Additional file 8. Upstream regulators**

**Table S3.** Significantly enriched upstream regulators\* for RNAIC vs MOCK stimulated pDCs based on all differentially expressed genes (FDR<0.05) with log2FC>1 (n=339). \*Pathway Studio \*\* One-sided Mann-Whitney U-test

| Upstream regulator | Total number of downstream genes (n) | Overlap (n) | Overlap (%) | Overlapping Entities                                                                                                                                                                                                                                                                                                                                                                                                                                                                                                                                                                                                                                                                                                                                                       | p-value** | Jaccard similarity |
|--------------------|--------------------------------------|-------------|-------------|----------------------------------------------------------------------------------------------------------------------------------------------------------------------------------------------------------------------------------------------------------------------------------------------------------------------------------------------------------------------------------------------------------------------------------------------------------------------------------------------------------------------------------------------------------------------------------------------------------------------------------------------------------------------------------------------------------------------------------------------------------------------------|-----------|--------------------|
| IRF1               | 127                                  | 34          | 26          | CXCL9;CXCL10;TNF;CD83;IRF2;IRF1;SOCS1;DDX58;TP53;TAP1;ICAM1;TAPBP;PMAIP1;CYBB;PSMB9;BBC3;HLA-A;IFIT1;NFKBIE;IFIT3;TNFSF10;PTGS2;IFNB1;BIRC3;TLR7;CD274;CDKN1A;OPTN;THBS1;GBP2;GBP1;CXCL8;MYD88;IL12A                                                                                                                                                                                                                                                                                                                                                                                                                                                                                                                                                                       | 2.80E-13  | 0.05               |
| STAT1              | 205                                  | 42          | 20          | HSPA1A;TNF;HSP90AB1;SOCS1;RUNX2;MVP;ICAM1;PML;CYBB;TRIP6;CD14;IFIT2;SOD2;SMAD3;TNFSF10;CD40;SCARB1;IFNB1;FAS;MCL1;CDKN1A;CXCL2;CXCL8;IL12A;CXCL9;CXCL10;IRF1;SOCS3;TAP1;BCL2L1;BCL2A1;PSMB9;ULK1;TYMP;PTGS2;TLR7;CD274;ADAR;GBP2;GBP1;MYD88;SLC1A3                                                                                                                                                                                                                                                                                                                                                                                                                                                                                                                         | 6.97E-12  | 0.05               |
| RELB               | 62                                   | 20          | 31          | IFNB1;PTGS2;BIRC3;TNF;TLR7;RELA;RELB;TP53;BECN1;CXCL2;PSMA5;TRAF2;BCL2L1;BCL2A1;HIF1A;CXCL8;GADD45B;IL12A;NFKBIA;SOD2                                                                                                                                                                                                                                                                                                                                                                                                                                                                                                                                                                                                                                                      | 7.58E-10  | 0.03               |
| NFKB1              | 86                                   | 23          | 26          | CXCL9;PTGS2;IFNB1;BIRC3;CXCL10;FAS;TNFAIP3;TNF;MCL1;OPTN;BCL2L1;BCL2A1;CREB1;BCL3;CD82;FSCN1;CXCL8;HIF1A;IL12A;ATF3;NFKB1;NFKB2;SOD2                                                                                                                                                                                                                                                                                                                                                                                                                                                                                                                                                                                                                                       | 2.32E-09  | 0.03               |
| RELA               | 252                                  | 42          | 16          | TADA2B;HSPA1A;TNFAIP3;TNF;RUNX2;RELA;RELB;TP53;BECN1;ICAM1;PEA15;TRAF1;LTB;NFKBIA;NFKBIE;NFKB1;NFKB2;CD40;IFNB1;BIRC3;FAS;NOTCH2;MCL1;CDKN1A;CXCL2;CXCL8;IL12A;CXCL10;IRF1;DDX58;BCL2L1;BCL2A1;BCL3;HIF1A;HLA-A;CCL4;PTGS2;SDC4;CD274;ACTN4;CREB1;GADD45B                                                                                                                                                                                                                                                                                                                                                                                                                                                                                                                  | 5.64E-09  | 0.05               |
| SP1                | 1358                                 | 130         | 9           | EREG;TNFAIP3;TNFAIP2;TNF;NBN;MFN2;TP53;TP11;MVP;HDAC7;NFKBIA;NFKB1;TSG101;TXN;NPPC;FLNA;NAMPT;MMP11;MRC1;DUSP6;TYMP;MTA3;TGFB3;THBS1;SLC29A1;THRA;PIM1;PLAT;PMAIP1;ANPEP;BBC3;SLC39A1;FAS;PPA1;PPARA;CXCL2;GTF2B;EZR;TNF2;WNT9A;CYCS;IFIH1;XRCC5;NR5A1;AATF;TNIP1;ABCF1;CKAP2;ACHE;ACTA2;KLF2;PRMT5;PLIN2;GCH1;PGK1;HSPA1A;TP63;CASP3;HSPA8;HSP90AB1;RUNX2;RELA;RUNX3;REST;BECN1;ICAM1;CCND2;ICAM2;CD14;IFI16;TNFSF9;TNFSF10;CD40;SCARB1;IGFBP3;PARK7;CDH1;NRP1;CDKN1A;CFLAR;CXCL8;IL12A;ATP1A1;NEU3;BCL2L1;HHEX;HIF1A;CENPW;PTGER4;PTGS2;NECTIN2;CA2;VCAN;LGALS1;SLC12A2;CD83;CSRP2;B4GALT5;CTNS;SLC9A3R2;CTNND1;LRP1;LTB;LTA;FSCN1;CYP1B1;CYLD;IL21R;SMAD3;SOD2;SP3;CD55;DBI;DDB1;SRC;SLC4A7;MCL1;DDIT3;IRF2;IRF1;SOCS3;RGCC;CD82;CCR7;CD274;KIT;CREB1;CREM;PTTG1;SLC1A3 | 3.05E-07  | 0.07               |
| IRF3               | 53                                   | 15          | 27          | IFNA2;TNFSF10;IFNB1;CXCL10;TNF;ZC3HAV1;TP53;CDKN1A;ICAM1;PMAIP1;CXCL8;IL12A;IFIT1;NFKBIE;IFIT2                                                                                                                                                                                                                                                                                                                                                                                                                                                                                                                                                                                                                                                                             | 7.23E-07  | 0.02               |
| STAT3              | 418                                  | 52          | 12          | HSPA1A;CASP3;HSP90AB1;SOCS1;RUNX2;RELA;TP53;ICAM1;CCND2;EECD;CD14;IFIT1;NFKB1;CDH1;IL18R1;CDKN1A;IL2RG;NAMPT;CXCL8;IL6ST;IL12A;BCL2L1;PSMB5;BCL3;PSMB8;HIF1A;PSMB9;ECE1;PTGS2;THBS1;MYD88;DNAJB4;PIM1;PML;FSCN1;SOD2;NR4A3;FAS;MCL1;DDIT3;CXCL2;STAT3;ATF3;IRF1;SOCS3;JUNB;KLF2;CD274;PRMT5;CREM;PTTG1;SLC1A3                                                                                                                                                                                                                                                                                                                                                                                                                                                              | 1.69E-06  | 0.05               |
| JUN                | 421                                  | 52          | 12          | HSPA1A;TP63;CASP3;TNF;RUNX2;TP53;RELB;REST;BECN1;ICAM1;PEA15;CCND2;POLI;NINJ1;IFNB1;TXN;CDKN1A;CFLAR;CXCL8;MMP11;SESN2;BCL2L1;BCL2A1;HIF1A;PPP1R15A;HK1;PTGS2;NECTIN2;THBS1;SLC29A1;TGIF1;GLUL;BBC3;SMAD3;BIRC3;SP3;FAS;PPARA;DDIT3;CXCL2;SMURF1;ATF3;CHKA;EZR;SOCS3;WNT9A;CD82;NR5A1;CCL4;CITED2;DDX21;CREB1                                                                                                                                                                                                                                                                                                                                                                                                                                                              | 2.10E-06  | 0.05               |
| FOXL2              | 21                                   | 9           | 40          | FAS;CDKN1A;PTTG1;ACTA2;TNFRSF1A;CCND2;NR5A1;SOD2;SMAD3                                                                                                                                                                                                                                                                                                                                                                                                                                                                                                                                                                                                                                                                                                                     | 3.52E-06  | 0.01               |
| STAT2              | 27                                   | 10          | 35          | TAP1;ADAR;SCARB1;GBP1;MYD88;IRF1;IFIT3;NFKB2;IFIT2;MCL1                                                                                                                                                                                                                                                                                                                                                                                                                                                                                                                                                                                                                                                                                                                    | 4.30E-06  | 0.02               |
| ATF2               | 104                                  | 20          | 19          | CASP3;TNF;CSRP2;PLAT;RELA;TP53;CBFB;ICAM1;HIF1A;PPP1R15A;HK1;SMAD3;PTGS2;IFNB1;ACHE;DDIT3;CDKN1A;CREB1;CXCL8;ATF3                                                                                                                                                                                                                                                                                                                                                                                                                                                                                                                                                                                                                                                          | 7.22E-06  | 0.03               |
| CYLD               | 18                                   | 8           | 42          | BCL3;STAT3;TNFRSF1A;MYD88;RIPK2;CYLD;DDX58;TRAF2                                                                                                                                                                                                                                                                                                                                                                                                                                                                                                                                                                                                                                                                                                                           | 9.70E-06  | 0.01               |
| CEBPB              | 366                                  | 45          | 12          | TNF;HSP90AB1;TNFRSF1A;PLAT;RUNX2;RELA;TP53;ICAM1;CD14;NFKBIB;NFKB1;SOD2;SCARB1;FAS;IGFBP3;PPARA;ANP32A;CDH1;DDIT3;CDKN1A;BANP;CXCL8;STAT3;IL12A;ATF3;CXCL9;CXCL10;CHKA;MMP11;FBXO32;CD200;SOCS3;HCLS1;SESN2;RGCC;CCR7;CCL3;CCL4;PTGER4;PTGS2;FOXA1;ACTA2;PLIN2;GCH1;GADD45B                                                                                                                                                                                                                                                                                                                                                                                                                                                                                                | 1.18E-05  | 0.05               |
| PSME3              | 6                                    | 5           | 71          | PSME3;PSME1;SMURF1;CDKN1A;KLF2                                                                                                                                                                                                                                                                                                                                                                                                                                                                                                                                                                                                                                                                                                                                             | 1.85E-05  | 0.01               |
| HIF1A              | 328                                  | 41          | 12          | ATRIP;HSPA1A;LGALS1;CASP3;TNF;NBN;RELA;EIF3I;BECN1;PMAIP1;LRP1;CYBB;SOD2;SMAD3;NR4A3;CD55;IGFBP3;PPARA;CDH1;MCL1;JMY;DDIT3;CDKN1A;NAMPT;CXCL8;CHKA;P4HA2;P4HA1;CYP46A1;BCL2L1;TCEB1;CD82;HIF1A;ECE1;PTGS2;ACTA2;CITED2;CD274;PIM2;SLC29A1;PGK1                                                                                                                                                                                                                                                                                                                                                                                                                                                                                                                             | 1.98E-05  | 0.05               |
| KLF6               | 53                                   | 13          | 24          | PPARA;CDH1;TP53;SOCS3;CDKN1A;PMAIP1;CXCL2;COX5A;CXCL8;IL6ST;PTTG1;NFKBIA;ATF3                                                                                                                                                                                                                                                                                                                                                                                                                                                                                                                                                                                                                                                                                              | 2.20E-05  | 0.02               |

|         |     |    |     |                                                                                                                                                                                                                                                                                                                                                 |          |          |
|---------|-----|----|-----|-------------------------------------------------------------------------------------------------------------------------------------------------------------------------------------------------------------------------------------------------------------------------------------------------------------------------------------------------|----------|----------|
| HSPA1A  | 112 | 20 | 17  | PIM1;HSPA1A;TNF;IRF1;RELA;TP53;TAP1;BECN1;CYCS;CYBB;HIF1A;CD14;NFKBIA;APAF1;SOD2;SMAD3;CD40;MCL1;APOBEC3G;ENDOG                                                                                                                                                                                                                                 | 2.25E-05 | 0.03     |
| TRAF6   | 47  | 12 | 25  | CD40;RIPK2;BIRC3;TRAF2;TGFB3;DCP1A;MAP3K1;MAP3K2;HIF1A;STAT3;SRC;SMAD3                                                                                                                                                                                                                                                                          | 3.03E-05 | 0.02     |
| BCL2    | 34  | 10 | 28  | BECN1;AMBRA1;XRCC6;COX5A;HSPA8;XRCC5;TNFRSF1A;APAF1;TP53;MCL1                                                                                                                                                                                                                                                                                   | 4.02E-05 | 0.02     |
| STIP1   | 7   | 5  | 62  | CDC37;STIP1;HSPA8;STAT3;HSPA1A                                                                                                                                                                                                                                                                                                                  | 4.68E-05 | 0.01     |
| NFKB2   | 22  | 8  | 34  | CREB1;FAS;CXCL9;HLA-A;PTGS2;RELA;RELB;NFKB2                                                                                                                                                                                                                                                                                                     | 5.02E-05 | 0.01     |
| AATF    | 17  | 7  | 38  | CDKN1A;BBC3;CASP10;TSG101;PEA15;AATF;TP53                                                                                                                                                                                                                                                                                                       | 6.61E-05 | 0.01     |
| ATF4    | 85  | 16 | 18  | PTGS2;RUNX2;TP53;BECN1;DDIT3;ATF5;PMAIP1;CREB1;GCH1;HIF1A;STAT3;HERPUD1;BBC3;PPP1R15A;ULK1;ATF3                                                                                                                                                                                                                                                 | 7.91E-05 | 0.02     |
| IRF2    | 30  | 9  | 29  | TNFSF10;IFNB1;TAPBP;CYBB;CD83;TLR7;IRF2;NFKBIE;RELA                                                                                                                                                                                                                                                                                             | 8.54E-05 | 0.01     |
| KLF4    | 174 | 25 | 14  | TNF;HSP90AB1;SOCS1;MFN2;RUNX2;RELA;TP53;RUNX3;ICAM1;CCND2;CD14;ULK1;SMAD3;ABCF1;SCARB1;PTGS2;IFNB1;ACTA2;KIT;CDH1;SLC4A7;KPNA2;CDKN1A;CXCL8;ATF3                                                                                                                                                                                                | 9.73E-05 | 0.03     |
| TRAF3   | 19  | 7  | 35  | CREB1;TNFRSF1A;ADAP2;TANK;SRC;TRAF2;MAP3K1                                                                                                                                                                                                                                                                                                      | 1.44E-04 | 0.01     |
| SPI1    | 200 | 27 | 13  | TNF;RUNX3;CTSS;CCND2;CYBB;CD14;IFIT3;TNFSF10;CD40;IFNB1;MCL1;IL12A;CXCL9;IRF1;CLEC5A;MRC1;BCL2L1;PSMB8;PSMB9;CCL3;HLA-DQB1;PTGS2;CITED2;KIT;BLNK;ADAR;DRAM1                                                                                                                                                                                     | 1.50E-04 | 0.03     |
| COMMD1  | 14  | 6  | 40  | SLC12A2;COMMD1;HIF1A;SOCS1;HSPA1A;RELA                                                                                                                                                                                                                                                                                                          | 1.88E-04 | 0.01     |
| DNAJA3  | 9   | 5  | 50  | HSPA8;NFKBIA;STAT3;HSPA1A;TP53                                                                                                                                                                                                                                                                                                                  | 1.89E-04 | 0.01     |
| PMAIP1  | 5   | 4  | 66  | PMAIP1;BCL2L1;BCL2A1;MCL1                                                                                                                                                                                                                                                                                                                       | 2.12E-04 | 0.01     |
| TAPBP   | 5   | 4  | 66  | TAPBP;HLA-B;TAP1;HLA-A                                                                                                                                                                                                                                                                                                                          | 2.12E-04 | 0.01     |
| PSMB8   | 2   | 3  | 100 | POMP;PSMB8;PSMB9                                                                                                                                                                                                                                                                                                                                | 2.50E-04 | 4.82E-03 |
| PIAS1   | 58  | 12 | 20  | CXCL9;CXCL10;STIP1;SP3;TNF;RELA;TP53;CDKN1A;CXCL2;STAT3;NR5A1;NFKBIA                                                                                                                                                                                                                                                                            | 2.57E-04 | 0.02     |
| GTF2B   | 35  | 9  | 25  | CDKN1A;CFLAR;CCND2;SP3;HSPA1A;CREM;GTF2B;RELA;SOD2                                                                                                                                                                                                                                                                                              | 3.00E-04 | 0.01     |
| CTNNA1  | 242 | 30 | 12  | VCAN;RUNX2;TP53;CCND2;PML;FSCN1;DKK4;IFIT1;IFNB1;GLCE;FAS;CDH1;NOTCH2;MCL1;NPPC;CXCL8;STAT3;DUSP6;BCL2L1;HLA-A;NR5A1;CCL4;PTGS2;SMC3;ACTA2;KLF2;CREB1;TGIF1;XIRP1;PTTG1                                                                                                                                                                         | 3.01E-04 | 0.04     |
| REL     | 105 | 17 | 16  | CXCL10;TNF;CD83;ICAM1;BCL2L1;HIF1A;NFKBIA;IFI16;IFIT3;SOD2;TNFSF10;IFNB1;CPSF3;MCL1;GBP2;CXCL8;IL12A                                                                                                                                                                                                                                            | 3.16E-04 | 0.02     |
| FOS     | 188 | 25 | 13  | TNF;TNFRSF1A;MMP11;RELA;RELB;TP53;CBFB;SOCS3;PRDX1;ICAM1;BCL2L1;CD82;NR5A1;PTGS2;SP3;ACHE;FAS;FOXA1;CDH1;DDIT3;CDKN1A;CFLAR;CXCL2;ENO1;CXCL8                                                                                                                                                                                                    | 3.32E-04 | 0.03     |
| RBPJ    | 78  | 14 | 17  | PTGS2;CASP3;ACTA2;NOTCH2;TP53;MCL1;SOCS3;CDKN1A;CTNND1;BCL2A1;HERPUD1;NFKBIA;NFKB1;NFKB2                                                                                                                                                                                                                                                        | 3.70E-04 | 0.02     |
| BCL2L1  | 22  | 7  | 30  | BID;BECN1;MFN2;CYCS;APAF1;BCL2L1;TP53                                                                                                                                                                                                                                                                                                           | 3.86E-04 | 0.01     |
| IRF9    | 16  | 6  | 35  | GBP1;MYD88;IRF1;IFNB1;IFIT3;IFIT2                                                                                                                                                                                                                                                                                                               | 4.17E-04 | 0.01     |
| TRAF1   | 6   | 4  | 57  | BIRC3;TRAF2;TRAF1;TNFRSF1A                                                                                                                                                                                                                                                                                                                      | 4.70E-04 | 0.01     |
| MCM7    | 6   | 4  | 57  | CEP68;ATRIP;TCEB1;HIF1A                                                                                                                                                                                                                                                                                                                         | 4.70E-04 | 0.01     |
| NFKBIB  | 6   | 4  | 57  | NFKBIB;TNF;RELA;NFKB1                                                                                                                                                                                                                                                                                                                           | 4.70E-04 | 0.01     |
| BCL6    | 62  | 12 | 19  | CD69;SOCS1;CDH1;CISH;TP53;SOCS3;ADAR;BAG6;CDKN1A;CCND2;BCL2L1;CCL3                                                                                                                                                                                                                                                                              | 4.86E-04 | 0.02     |
| HSPB1   | 38  | 9  | 23  | BID;CYCS;FAS;CASP3;STAT3;ACTA2;NFKBIA;APAF1;TP53                                                                                                                                                                                                                                                                                                | 5.70E-04 | 0.01     |
| CREB1   | 587 | 57 | 9   | HSPA1A;TNF;HSP90AB1;TP53;REST;RFX5;ICAM1;CCND2;CD14;NFKBIA;CD40;SCARB1;IFNB1;CD69;CPSF3;IGFBP4;CXCL8;GYS1;CHCHD2;BCL2L1;PPP1R15A;HLA-A;HLA-B;PTGER4;PTGS2;HLA-E;FOXA1;NECTIN2;THBS1;PLAT;COX5A;FSCN1;CYP1B1;BBC3;SOD2;SMAD3;NR4A3;SLC39A1;CD55;MCL1;CXCL2;STAT3;GTF2B;ATF3;CXCL10;CYCS;JUNB;CCR7;CCL4;SMC3;ACHE;KPNA2;CREB1;GCH1;CREM;PGK1;SKP1 | 6.75E-04 | 0.05     |
| TCF7L2  | 84  | 14 | 16  | PTGS2;GLCE;SMC3;VCAN;HECA;CDH1;TP53;NUP62;TGIF1;FSCN1;STAT3;IL6ST;PTTG1;DKK4                                                                                                                                                                                                                                                                    | 7.97E-04 | 0.02     |
| DDIT3   | 48  | 10 | 20  | PTGS2;PPARA;IRF1;RELA;DDIT3;CDKN1A;ATF5;CXCL8;BBC3;PPP1R15A                                                                                                                                                                                                                                                                                     | 8.07E-04 | 0.02     |
| NFKBIA  | 18  | 6  | 31  | TNF;CXCL8;NFKBIA;NFKBIE;NFKB1;NFKB2                                                                                                                                                                                                                                                                                                             | 8.19E-04 | 0.01     |
| HIVP1   | 7   | 4  | 50  | IFNB1;IRF1;CDKN1A;TP53                                                                                                                                                                                                                                                                                                                          | 8.93E-04 | 0.01     |
| TRAF5   | 7   | 4  | 50  | TRAF2;TRAF1;IL6ST;MAP3K1                                                                                                                                                                                                                                                                                                                        | 8.93E-04 | 0.01     |
| RNF31   | 7   | 4  | 50  | CYLD;CD40;DDX58;TNFRSF1A                                                                                                                                                                                                                                                                                                                        | 8.93E-04 | 0.01     |
| ATG14   | 3   | 3  | 75  | SNAP29;ATG14;SNAPIN                                                                                                                                                                                                                                                                                                                             | 9.51E-04 | 4.81E-03 |
| DSG3    | 3   | 3  | 75  | JUP;EZR;SRC                                                                                                                                                                                                                                                                                                                                     | 9.51E-04 | 4.81E-03 |
| DNAJA1  | 3   | 3  | 75  | DNAJA1;HSPA8;HSPA1A                                                                                                                                                                                                                                                                                                                             | 9.51E-04 | 4.81E-03 |
| ICAM2   | 3   | 3  | 75  | EZR;ICAM2;ICAM1                                                                                                                                                                                                                                                                                                                                 | 9.51E-04 | 4.81E-03 |
| TNFRSF9 | 3   | 3  | 75  | TRAF2;TRAF1;TNFRSF4                                                                                                                                                                                                                                                                                                                             | 9.51E-04 | 4.81E-03 |
| EIF3I   | 3   | 3  | 75  | GCH1;EZR;EIF3I                                                                                                                                                                                                                                                                                                                                  | 9.51E-04 | 4.81E-03 |
| ZBTB2   | 3   | 3  | 75  | ZBTB2;CDKN1A;TP53                                                                                                                                                                                                                                                                                                                               | 9.51E-04 | 4.81E-03 |
| NRBF2   | 3   | 3  | 75  | NRBF2;BECN1;ATG14                                                                                                                                                                                                                                                                                                                               | 9.51E-04 | 4.81E-03 |
| DNMT3A  | 67  | 12 | 17  | APCDD1;PTGS2;FAS;TNF;CITED2;CDH1;TP53BP2;CDKN1A;IL2RG;TP53INP1;HK1;TNFSF9                                                                                                                                                                                                                                                                       | 9.94E-04 | 0.02     |

|          |     |    |     |                                                                                                                                                                                          |          |          |
|----------|-----|----|-----|------------------------------------------------------------------------------------------------------------------------------------------------------------------------------------------|----------|----------|
| AR       | 180 | 23 | 12  | VCAN;TNF;RUNX2;RELA;TP53;B2M;BCL2L1;NR5A1;IFI16;PTGS2;IGFBP3;PPARA;SNAI3;KLF2;KIT;CDH1;SRC;KPNA2;CDKN1A;CFLAR;CREB1;CXCL8;PTTG1                                                          | 9.96E-04 | 0.03     |
| PARK2    | 19  | 6  | 30  | BECN1;AMBRA1;PARK7;OPTN;TRAF2;HSPA1A                                                                                                                                                     | 1.11E-03 | 0.01     |
| TBP      | 97  | 15 | 15  | HSPA1A;LGALS1;TNF;RELA;ICAM1;SUPT16H;CYP1B1;PTGS2;IFNB1;IGFBP3;TXN;CDKN1A;CXCL2;CXCL8;GTF2B                                                                                              | 1.15E-03 | 0.02     |
| HSP90AB1 | 13  | 5  | 35  | HIF1A;HSP90AB1;LRP1;APAF1;HSPA1A                                                                                                                                                         | 1.22E-03 | 0.01     |
| CIITA    | 13  | 5  | 35  | PSM5;HLA-DRB1;HLA-A;BTN2A2;HLA-DQA1                                                                                                                                                      | 1.22E-03 | 0.01     |
| BCL3     | 27  | 7  | 25  | CRTC3;BIRC3;BCL3;TNF;CXCL8;NFKB1;NFKB2                                                                                                                                                   | 1.41E-03 | 0.01     |
| IRF5     | 20  | 6  | 28  | TNFSF10;TNF;CD83;CDKN1A;IFNB1;IRF1                                                                                                                                                       | 1.47E-03 | 0.01     |
| FBXW7    | 20  | 6  | 28  | KLF2;ENO1;NFE2L3;RUNX2;NFKB2;MCL1                                                                                                                                                        | 1.47E-03 | 0.01     |
| BBC3     | 8   | 4  | 44  | BCL2L1;BBC3;BCL2A1;MCL1                                                                                                                                                                  | 1.53E-03 | 0.01     |
| PIN1     | 90  | 14 | 15  | NR4A3;PIM1;TP63;RUNX2;TP53;MCL1;RUNX3;APOBEC3G;PML;CREB1;PGK1;HIF1A;AATF;SMAD3                                                                                                           | 1.58E-03 | 0.02     |
| SP3      | 293 | 32 | 10  | TNF;PLAT;TP53;REST;SLC9A3R2;MVP;LRP1;IL21R;TNFSF9;SOD2;SMAD3;TNFSF10;CD40;SCARB1;SP3;IGFBP3;SLC4A7;NPPC;CDKN1A;ATF3;NEU3;CYP46A1;SOCS3;RGCC;HHEX;NR5A1;CENPW;TNIP1;PTGS2;GCH1;PGK1;PTTG1 | 1.71E-03 | 0.04     |
| TAF1     | 14  | 5  | 33  | FAS;CDKN1A;IFNB1;SRC;HSPA1A                                                                                                                                                              | 1.73E-03 | 0.01     |
| COPS8    | 14  | 5  | 33  | MAPRE1;SKP1;DDB1;NFKBIA;TP53                                                                                                                                                             | 1.73E-03 | 0.01     |
| MUC1     | 21  | 6  | 27  | JUP;HIF1A;CTNND1;ICAM1;RELA;TP53                                                                                                                                                         | 1.92E-03 | 0.01     |
| HDAC6    | 21  | 6  | 27  | HIF1A;STAT3;CDKN1A;MYD88;MFN2;TP53                                                                                                                                                       | 1.92E-03 | 0.01     |
| HSF1     | 102 | 15 | 14  | DNAJA1;HSPA1A;CDC37;TNF;HSPA8;HSP90AB1;SOCS3;HSPBP1;NFKBIA;SMAD3;PTGS2;STIP1;UBB;CXCL8;STAT3                                                                                             | 1.92E-03 | 0.02     |
| FOXO3    | 124 | 17 | 13  | FBXO32;SESN3;GLUL;SOCS3;CCND2;BBC3;TANK;APAF1;SMAD3;SOD2;TNFSF10;IGFBP3;CITED2;TXN;CDKN1A;CFLAR;NAMPT                                                                                    | 2.12E-03 | 0.02     |
| SUMO1    | 29  | 7  | 23  | PML;FAS;HIF1A;TNFRSF1A;IRF1;TP53;SMAD3                                                                                                                                                   | 2.18E-03 | 0.01     |
| PTGS2    | 4   | 3  | 60  | PTGS2;CYCS;TP53                                                                                                                                                                          | 2.27E-03 | 4.80E-03 |
| ARID3A   | 4   | 3  | 60  | CDKN1A;PML;TP53                                                                                                                                                                          | 2.27E-03 | 4.80E-03 |
| ATP1A1   | 4   | 3  | 60  | PRKCH;ATP1A1;SRC                                                                                                                                                                         | 2.27E-03 | 4.80E-03 |
| TAP1     | 4   | 3  | 60  | TAP1;B2M;HLA-A                                                                                                                                                                           | 2.27E-03 | 4.80E-03 |
| IFIT1    | 4   | 3  | 60  | IFIT1;IFIT3;IFIT2                                                                                                                                                                        | 2.27E-03 | 4.80E-03 |
| HSPBP1   | 4   | 3  | 60  | HSPBP1;HSPA8;HSPA1A                                                                                                                                                                      | 2.27E-03 | 4.80E-03 |
| SSRP1    | 4   | 3  | 60  | SSRP1;SUPT16H;TP53                                                                                                                                                                       | 2.27E-03 | 4.80E-03 |
| GATAD2B  | 4   | 3  | 60  | PTGS2;GATAD2B;CXCL8                                                                                                                                                                      | 2.27E-03 | 4.80E-03 |
| IRF8     | 46  | 9  | 19  | APOBEC3G;CXCL9;IFNB1;PTGS2;CYBB;TNF;IRF1;IL12A;IFIT1                                                                                                                                     | 2.33E-03 | 0.01     |
| BAG3     | 15  | 5  | 31  | HSPA8;MVP;BCL2L1;HSPA1A;MCL1                                                                                                                                                             | 2.39E-03 | 0.01     |
| SMAD2    | 94  | 14 | 14  | PTGS2;CSR2;ACTA2;MMP11;CITED2;CDH1;MFN2;BECN1;CDKN1A;RGCC;JUNB;HHEX;FSCN1;STAT3                                                                                                          | 2.40E-03 | 0.02     |
| CDK9     | 30  | 7  | 22  | CDKN1A;PTGS2;CCND2;TNF;CXCL8;CYP1B1;IL12A                                                                                                                                                | 2.66E-03 | 0.01     |
| BTRC     | 47  | 9  | 18  | REST;JUP;LPIN1;NFKBIB;IL10RA;NFKBIE;NFKB1;TP53;SMAD3                                                                                                                                     | 2.72E-03 | 0.01     |
| CLU      | 16  | 5  | 29  | XRCC6;NFKBIA;MSRB1;BCL2L1;MMP25                                                                                                                                                          | 3.21E-03 | 0.01     |
| CFLAR    | 16  | 5  | 29  | CASP3;CASP10;CFLAR;AATF;TRAF2                                                                                                                                                            | 3.21E-03 | 0.01     |
| CCNT1    | 10  | 4  | 36  | MRC1;TNF;RN7SK;HSPA1A                                                                                                                                                                    | 3.62E-03 | 0.01     |
| HSPD1    | 24  | 6  | 24  | HLA-E;BCL2L1;HSPA1A;CASP3;HLA-A;TP53                                                                                                                                                     | 3.87E-03 | 0.01     |
| ETS1     | 200 | 23 | 11  | EREG;CASP3;TNF;SOCS1;RUNX2;TP53;RUNX3;ICAM1;LTB;ANPEP;PPARA;MCL1;CDKN1A;SRGN;CXCL8;PRDX1;DUSP6;BCL2L1;PIM3;JUNB;ECE1;ZNF267;PTGS2                                                        | 3.94E-03 | 0.03     |
| HLA-B    | 1   | 2  | 100 | HLA-B;HLA-A                                                                                                                                                                              | 3.97E-03 | 3.21E-03 |
| TYMP     | 1   | 2  | 100 | TYMP;LYN                                                                                                                                                                                 | 3.97E-03 | 3.21E-03 |
