# Supplementary material for: Cytokine production by activated plasmacytoid dendritic cells and natural killer cells is suppressed by an IRAK4 inhibitor
Source: Springer Nature journal article supplement (doi:10.1186/s13075-018-1702-0), 2018-10-24
Supplement: MOESM10 [file 16222790]

## Additional file 10. Enriched biological function pathways

**Table S4.** Significantly enriched biological function pathways\* based on differentially expressed genes (FDR<0.05) for RNAiC vs MOCK stimulated pDCs and for RNAiC HCQ vs RNAiC I92 (n=125) \* total number of entities/genes annotated within pathway. \*Pathway Studio  
\*\* One-sided Mann-Whitney U-test

| Biological function                              | Entities (n)* | Expanded entities (n) | Overlapping entities (n) | Overlap (%) | Name of overlapping entities | p-value** | Jaccard similarity |
|--------------------------------------------------|---------------|-----------------------|--------------------------|-------------|------------------------------|-----------|--------------------|
| Macroautophagy Decline                           | 35            | 42                    | 3                        | 7           | ATG14;AMBRA1;BECN1           | 5.16E-04  | 0.02               |
| Metaphase/Anaphase Phase Transition              | 16            | 62                    | 3                        | 4           | PSMB8;PSMB9;PTTG1            | 1.61E-03  | 0.02               |
| Endogenous Peptide Antigen Presentation          | 16            | 46                    | 2                        | 4           | PSMB8;PSMB9                  | 0.01      | 0.01               |
| Protein Folding                                  | 24            | 134                   | 3                        | 2           | CCT7;PSMB8;PSMB9             | 0.01      | 0.01               |
| ER Associated Degradation in Vesicular Transport | 26            | 62                    | 2                        | 3           | PSMB8;PSMB9                  | 0.02      | 0.01               |
| mTOR Signaling Overview                          | 112           | 301                   | 4                        | 1           | AMBRA1;ATG14;PSMB8;PSMB9     | 0.03      | 0.01               |
| Ubiquitin Dependent Protein Degradation          | 13            | 82                    | 2                        | 2           | PSMB8;PSMB9                  | 0.04      | 0.01               |
