# Supplementary material for: Cytokine production by activated plasmacytoid dendritic cells and natural killer cells is suppressed by an IRAK4 inhibitor
Source: Arthritis Res Ther. 2018 Oct 24;20:238. doi: 10.1186/s13075-018-1702-0 (PMC6235225; doi:10.1186/s13075-018-1702-0)
Supplement: Supplementary file 2 — Figure S1. Titration of IRAK4 inhibitor (I92) on cytokine production by cocultured plasmacytoid dendritic cells and NK cells. (PDF 194 kb) [file 13075_2018_1702_MOESM2_ESM.pdf]

**Additional file 2.** Titration of IRAK4 inhibitor (I92) on cytokine production by co-cultured plasmacytoid dendritic cells and NK cells

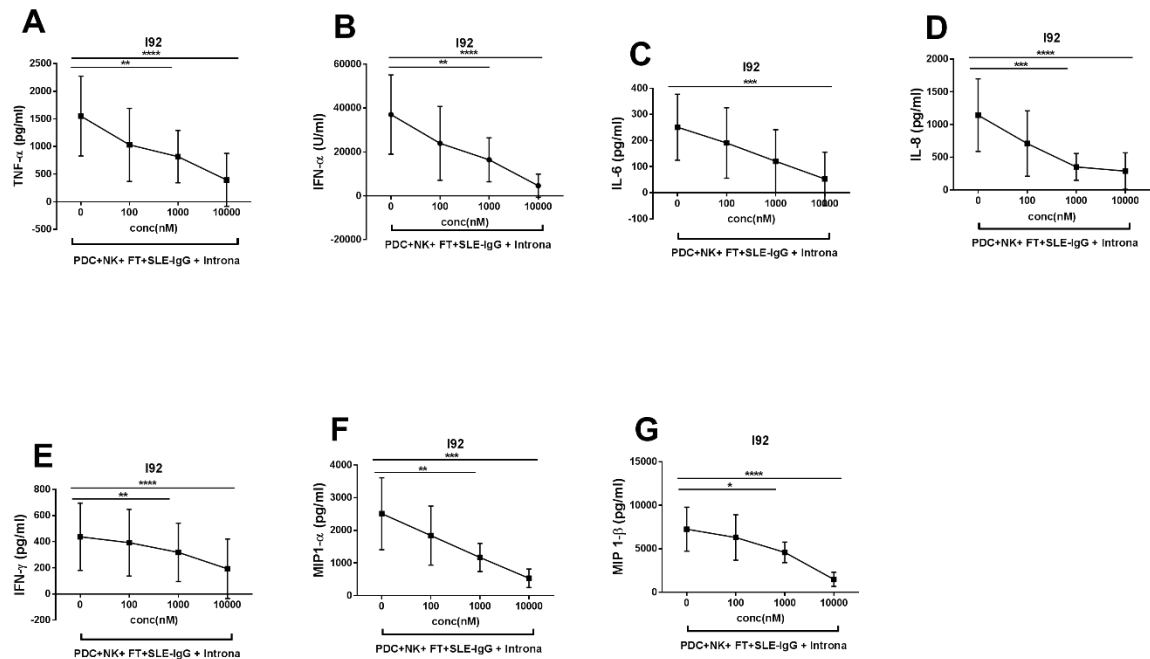

**Additional figure S1.** Effect of different concentrations of IRAK4 inhibitor I92 on cytokine production by activated plasmacytoid dendritic cells (pDCs) and NK cells. The cells from healthy individuals were co-cultured and stimulated with SLE-IgG, freeze-thawed necrotic cell material (FT) and supplemented with IFN- $\alpha$ 2b (Introna) in the presence of Interleukin 1 Receptor Associated Kinase (IRAK) 4 inhibitor I92. The cytokine production in the cell cultures were analyzed after 20 h by immunoassays. A significant reduction of cytokine levels was observed for (A) tumor necrosis factor (TNF)- $\alpha$  (B) interferon (IFN)- $\alpha$  (C) IL-6 (D) IL-8 (E) IFN- $\gamma$  (F) macrophage inflammatory protein (MIP1)- $\alpha$  (G) MIP-1 $\beta$  when using the IRAK4 inhibitor I92 in a concentration range of 1000 to 10000 nM. Based on these results the concentration of 10000nM was chosen for further use. Data represent the mean with standard deviation based on 6 donors in two independent experiments. (Friedman's test, Dunn's test for multiple comparisons, \* refers to  $p < 0.05$ , \*\*  $p < 0.01$ , \*\*\*  $p < 0.001$  and \*\*\*\*  $p < 0.0001$ )
