# Supplementary material for: Cytokine production by activated plasmacytoid dendritic cells and natural killer cells is suppressed by an IRAK4 inhibitor
Source: Arthritis Res Ther. 2018 Oct 24;20:238. doi: 10.1186/s13075-018-1702-0 (PMC6235225; doi:10.1186/s13075-018-1702-0)
Supplement: Supplementary file 4 — Figure S3. Titration of hydroxychloroquine in cocultured plasmacytoid dendritic cells and NK cells. (PDF 221 kb) [file 13075_2018_1702_MOESM4_ESM.pdf]

**Additional file 4.** Titration of hydroxychloroquine in co-cultured plasmacytoid dendritic cells and NK cells

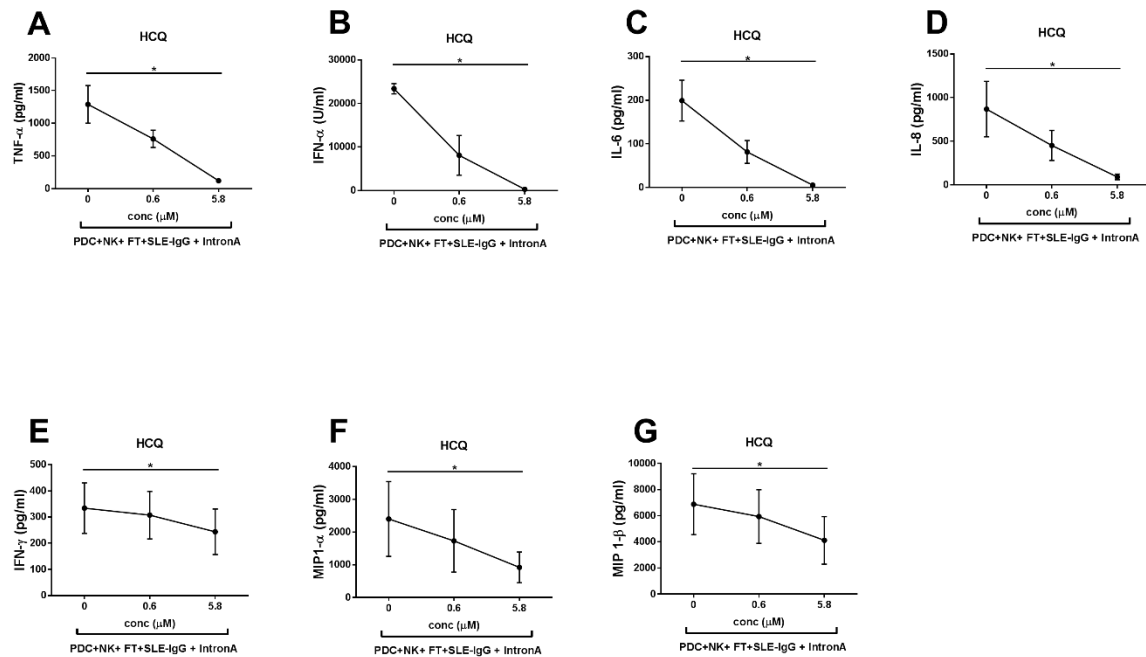

**Additional figure S3.** Effect of different concentrations of hydroxychloroquine (HCQ) on cytokine production by activated plasmacytoid dendritic cells (pDCs) and NK cells. The cells from healthy individuals were stimulated with SLE-IgG, freeze-thawed necrotic cell material and supplemented with IFN- $\alpha$ 2b (IntronA) in the presence of three concentrations of HCQ. The cytokine production in the cell cultures was analyzed after 20 h by immunoassays. A significant reduction of cytokine levels was observed for (A) TNF- $\alpha$  (B) IFN- $\alpha$  (C) IL-6 (D) IL-8 (E) IFN- $\gamma$  (F) macrophage inflammatory protein (MIP)1- $\alpha$  (G) MIP-1 $\beta$  when the cultures were supplemented with 5.8  $\mu$ M HCQ. Data represent the mean with standard deviation based on 3 donors from one experiment. (Friedman's test, Dunn's test for multiple comparisons, \* refers to  $p < 0.05$ )
