# Supplementary material for: Cytokine production by activated plasmacytoid dendritic cells and natural killer cells is suppressed by an IRAK4 inhibitor
Source: Arthritis Res Ther. 2018 Oct 24;20:238. doi: 10.1186/s13075-018-1702-0 (PMC6235225; doi:10.1186/s13075-018-1702-0)
Supplement: Supplementary file 9 — Figure S6. Overlap of differentially expressed genes in plasmacytoid dendritic cells. (PDF 135 kb) [file 13075_2018_1702_MOESM9_ESM.pdf]

**Additional file 9.** Overlap of differentially expressed genes in plasmacytoid dendritic cells

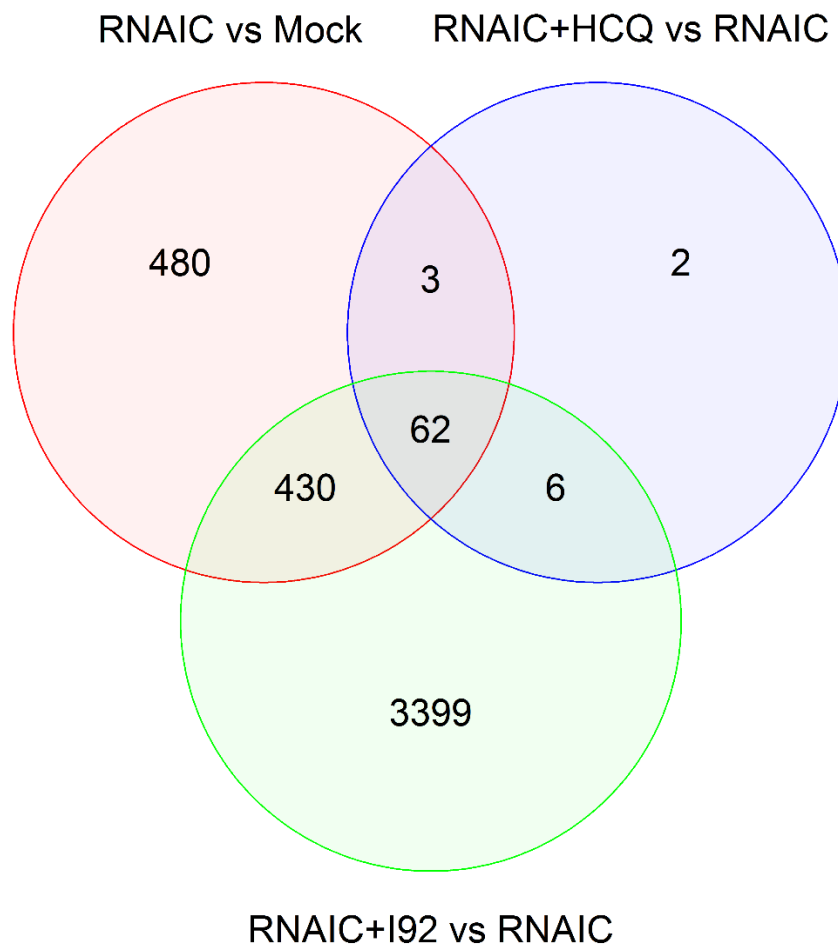

**Additional figure S6.** Venn diagram showing number of overlapping differentially expressed genes (DEGs) between the different plasmacytoid dendritic cell (pDC) treatment conditions. (FDR<0.05) Red: 975 DEGs in RNA-containing immune complexes (RNA-IC) vs mock stimulated pDCs. Blue: 73 DEGs in hydroxychloroquine (HCQ) treated, RNA-IC stimulated vs RNA-IC stimulated pDCs. Green: 3897 DEGs in the IRAK-4 inhibitor (I92) treated, RNA-IC stimulated vs RNA-IC stimulated pDCs.
